# Supplementary material for: Substituent-controlled site-selective silylation of 2H-indazoles to access silylated 1H-indazoles and 2H-indazoles under transition metal-free conditions
Source: Royal Society of Chemistry journal article supplement (doi:10.1039/d3qo01103h), 2023-01-01

# Substituent-Controlled Site-Selective Silylation of 2*H*-indazoles to Access Silylated 1*H*-indazoles and 2*H*-indazoles under Transition Metal Free Conditions

Jia Jia,<sup>a#</sup> Shuai Chen,<sup>b#</sup> Ting Mao,<sup>a</sup> Jinlan Li,<sup>a</sup> Weipiao Li,<sup>a</sup> An-Jun Wang,<sup>a</sup> Dezhi Yang,<sup>a</sup> Zhengli Liu,<sup>b,c\*</sup> Chun-Yang He,<sup>a\*</sup> and Zhang Feng<sup>b,c\*</sup>

<sup>a</sup>Key Laboratory of Biocatalysis & Chiral Drug Synthesis of Guizhou Province, School of Pharmacy, Zunyi Medical University, Zunyi, Guizhou, 563003, P.R. China

<sup>b</sup>Chongqing Key Laboratory of Natural Product Synthesis and Drug Research, School of Pharmaceutical Sciences, Chongqing University, Chongqing 401331, P. R. China

<sup>c</sup>Affiliated Hospital of North Sichuan Medical College and Medical Imaging Key Laboratory of Sichuan Province, Nanchong 637503, China.

## List of Contents

|                                                                                                |     |
|------------------------------------------------------------------------------------------------|-----|
| General Information and Materials.....                                                         | S2  |
| Optimization of Transition-Metal-Free Selective Silylation of Indazoles.....                   | S3  |
| Optimization of Transition-Metal-Free Selective Silylation of Indazoles protected by SEM ..... | S 5 |
| Preparation of Indazole Substrates.....                                                        | S7  |
| General Procedure for Regioselective Silylation of Indazoles.....                              | S9  |
| Gram-scale experimental procedures.....                                                        | S10 |
| Experimental Procedures for Transformations.....                                               | S11 |
| Experimental Procedures and Characterization Data for Products.....                            | S12 |
| References.....                                                                                | S33 |
| Spectra of Products 1-49.....                                                                  | S34 |

**General information:**  $^1\text{H}$  NMR and  $^{13}\text{C}$  NMR spectra were recorded on Agilent 400MR DD2 (400 MHz) or 600MR DD2 (600 MHz) spectrometer at ambient temperature. Chemical shifts ( $\delta$ ) are reported in ppm, and coupling constants ( $J$ ) are in Hertz (Hz). The following abbreviations were used to explain the multiplicities: s = singlet, d = doublet, t = triplet, q = quartet, m = multiplet, sept = septet. NMR yield was determined by  $^1\text{H}$  NMR using mesitylene as an internal standard before working up the reaction.

**Materials:** All reagents that used were from commercial sources, unless otherwise specified. *t*-BuONa (99%) was purchased from TCI. Diglyme and DMF were distilled under reduced pressure from  $\text{CaH}_2$ . Cyclohexane, THF, MTBE, DME, and CPME were distilled from sodium immediately before used.

**Optimization of Transition-Metal-Free Selective Silylation of Indazoles (Table S1-S4):**

**Table S1. Screening of Ligand and Temperature.<sup>a</sup>**

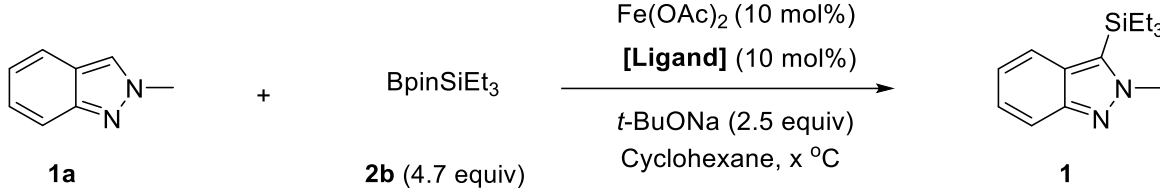

| Entry    | [Fe]                       | Ligand      | Temp (°C) | Yield <sup>b</sup> |
|----------|----------------------------|-------------|-----------|--------------------|
| 1        | Fe(OAc) <sub>2</sub>       | dppe        | 135       | 71%                |
| 2        | Fe(OAc) <sub>2</sub>       | BINAP       | 135       | 30%                |
| 3        | Fe(OAc) <sub>2</sub>       | dpppe       | 135       | 32%                |
| 4        | Fe(OAc) <sub>2</sub>       | dppe        | 130       | 78%                |
| 5        | Fe(OAc) <sub>2</sub>       | dppe        | 120       | 74%                |
| 6        | Fe(OAc) <sub>2</sub>       | dppe        | 100       | 73%                |
| 7        | Fe(OAc) <sub>2</sub>       | dppe        | 90        | 79%                |
| 8        | Fe(OAc) <sub>2</sub>       | dppe        | 80        | 85%                |
| <b>9</b> | <b>Fe(OAc)<sub>2</sub></b> | <b>dppe</b> | <b>70</b> | <b>93%(87%)</b>    |
| 10       | Fe(OAc) <sub>2</sub>       | dppe        | 60        | 87%                |

<sup>a</sup>Reaction conditions (unless otherwise specified): **1a** (0.2 mmol, 1.0 equiv), **2b** (4.7 equiv), *t*-BuONa (2.5 equiv), Fe(OAc)<sub>2</sub> (10 mol%), ligand (10 mol%), cyclohexane (1.0 mL), 16 h, under argon atmosphere. <sup>b</sup>Determined by <sup>1</sup>H NMR using mesitylene as an internal standard.

**Table S2. Control Experiments of Iron-Catalyzed Silylation of Indazoles.<sup>a</sup>**

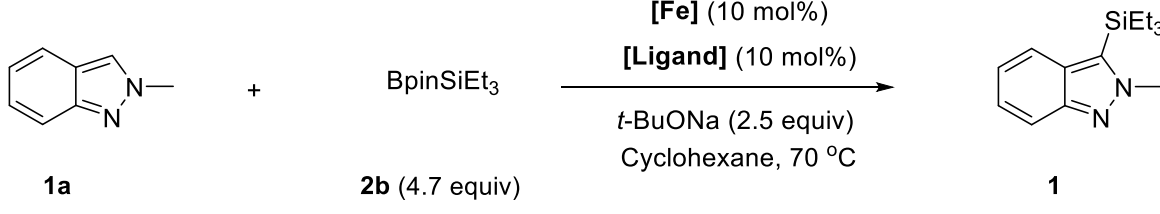

| Entry    | [Fe]                 | Ligand | Base                  | Yield <sup>b</sup> |
|----------|----------------------|--------|-----------------------|--------------------|
| <b>1</b> | -                    | dppe   | <i>t</i> -BuONa       | 88%                |
| 2        | Fe(OAc) <sub>2</sub> | -      | <i>t</i> -BuONa       | 59%                |
| 3        | Fe(OAc) <sub>2</sub> | dppe   | -                     | 2%                 |
| <b>4</b> | -                    | -      | <b><i>t</i>-BuONa</b> | <b>99%(89%)</b>    |

<sup>a</sup>Reaction conditions (unless otherwise specified): **1a** (0.2 mmol, 1.0 equiv), **2b** (4.7 equiv), Fe(OAc)<sub>2</sub> (10 mol%), dppe (10 mol%), *t*-BuONa (2.5 equiv), cyclohexane (1.0 mL), 70 °C, 16 h,

under argon atmosphere. <sup>b</sup>Determined by <sup>1</sup>H NMR using mesitylene as an internal standard.

**Table S3. Screening of Bases.<sup>a</sup>**

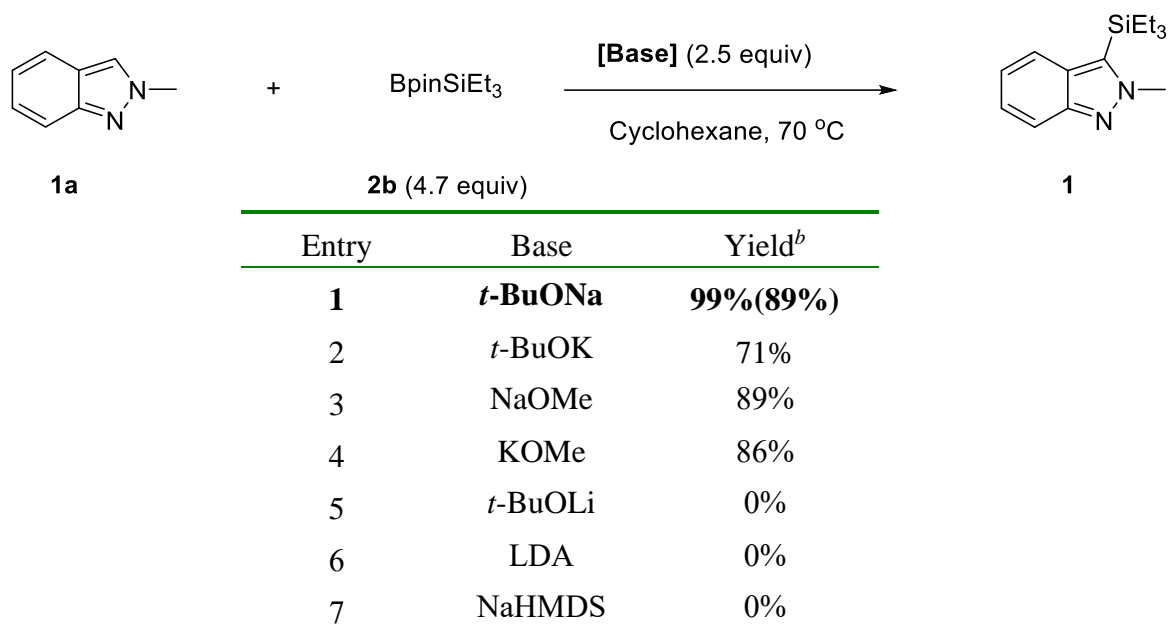

<sup>a</sup>Reaction conditions (unless otherwise specified): **1a** (0.2 mmol, 1.0 equiv), **2b** (4.7 equiv), Base (2.5 equiv), cyclohexane (1.0 mL), 70 °C, 16 h, under argon atmosphere. <sup>b</sup>Determined by <sup>1</sup>H NMR using mesitylene as an internal standard.

**Table S4. Screening of Solvents.<sup>a</sup>**

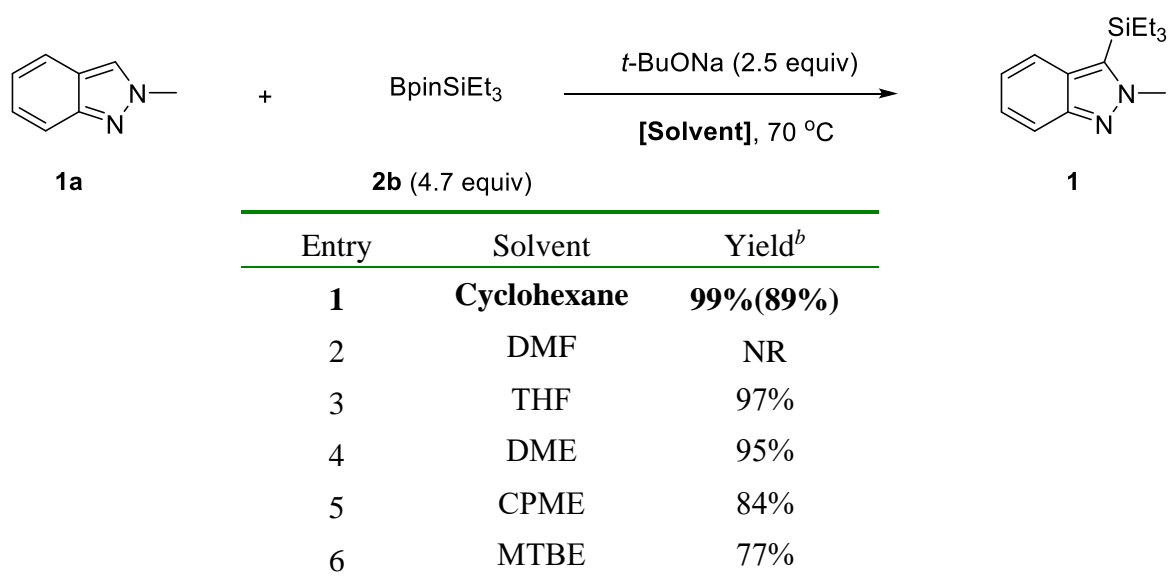

<sup>a</sup>Reaction conditions (unless otherwise specified): **1a** (0.2 mmol, 1.0 equiv), **2b** (4.7 equiv), *t*-BuONa (2.5 equiv), Solvent (1.0 mL), 70 °C, 16 h, under argon atmosphere. <sup>b</sup>Determined by <sup>1</sup>H NMR using mesitylene as an internal standard.

**Optimization of Transition-Metal-Free Selective Silylation of Indazoles Protected by SEM (Table S5-S9):**

**Table S5. Screening of Solvents and Bases.<sup>a</sup>**

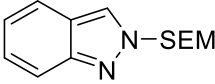

**37a**

+

**2b** (4.7 equiv)

$\xrightarrow[\text{[Solvent], 70 }^\circ\text{C}]{\text{[Base] (2.5 equiv)}}$



**37**

| Entry    | Base                  | Solvent     | Yield <sup>b</sup> |
|----------|-----------------------|-------------|--------------------|
| 1        | <i>t</i> -BuONa       | Cyclohexane | 9%                 |
| 2        | <i>t</i> -BuOK        | Cyclohexane | NR                 |
| 3        | KOMe                  | Cyclohexane | NR                 |
| 4        | NaOMe                 | Cyclohexane | NR                 |
| <b>5</b> | <b><i>t</i>-BuONa</b> | <b>THF</b>  | <b>(22%)</b>       |
| 6        | <i>t</i> -BuONa       | DME         | 10%                |
| 7        | <i>t</i> -BuONa       | MTBE        | NR                 |
| 8        | <i>t</i> -BuONa       | Diglyme     | 18%                |

<sup>a</sup>Reaction conditions (unless otherwise specified): **37a** (0.2 mmol, 1.0 equiv), **2b** (4.7 equiv), Base (2.5 equiv), Solvent (1.0 mL), 70 °C, 16 h, under argon atmosphere. <sup>b</sup>Determined by <sup>1</sup>H NMR using mesitylene as an internal standard.

**Table S6. Screening of Temperature.<sup>a</sup>**

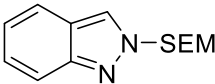

**37a**

+

**2b** (4.7 equiv)

$\xrightarrow[\text{THF, x } ^\circ\text{C}]{t\text{-BuONa (2.5 equiv)}}$



**37**

| Entry    | Temp (°C)  | Yield <sup>b</sup> |
|----------|------------|--------------------|
| 1        | 60         | 8%                 |
| 2        | 70         | 18%                |
| 3        | 90         | 19%                |
| 4        | 100        | 21%                |
| 5        | 110        | 24%                |
| <b>6</b> | <b>130</b> | <b>35%</b>         |

<sup>a</sup>Reaction conditions (unless otherwise specified): **37a** (0.2 mmol, 1.0 equiv), **2b** (4.7 equiv), *t*-BuONa (2.5 equiv), THF (1.0 mL), 16 h, under argon atmosphere. <sup>b</sup>Determined by <sup>1</sup>H NMR using

mesitylene as an internal standard.

**Table S7. Evaluation of the Amount of Bases.<sup>a</sup>**

| Entry    | <i>t</i> -BuONa (equiv) | Yield <sup>b</sup> |
|----------|-------------------------|--------------------|
| 1        | 1.0                     | 6%                 |
| 2        | 2.0                     | 32%                |
| 3        | 2.5                     | 35%                |
| 4        | 3.0                     | 32%                |
| 5        | 4.0                     | 42%                |
| 6        | 5.0                     | 43%                |
| <b>7</b> | <b>6.0</b>              | <b>48%(43%)</b>    |
| 8        | 7.0                     | 32%                |
| 9        | 8.0                     | 33%                |

<sup>a</sup>Reaction conditions (unless otherwise specified): **37a** (0.2 mmol, 1.0 equiv), **2b** (4.7 equiv), *t*-BuONa (x equiv), THF (1.0 mL), 130 °C, 16 h, under argon atmosphere. <sup>b</sup>Determined by <sup>1</sup>H NMR using mesitylene as an internal standard.

**Table S8. Evaluation of the Amount of BpinSiEt<sub>3</sub> 2a.<sup>a</sup>**

| Entry    | <b>2b</b> (equiv) | Yield <sup>b</sup> |
|----------|-------------------|--------------------|
| 1        | 4.7               | 48%                |
| 2        | 5.7               | 45%                |
| 3        | 6.6               | 50%                |
| <b>4</b> | <b>7.5</b>        | <b>(75%)</b>       |

<sup>a</sup>Reaction conditions (unless otherwise specified): **37a** (0.2 mmol, 1.0 equiv), **2b** (x equiv), *t*-BuONa (6.0equiv), THF (1.0 mL), 130 °C, 16 h, under an argon atmosphere. <sup>b</sup>Determined by <sup>1</sup>H NMR using mesitylene as an internal standard.

**Table S9. Optimization of Silylation of Indazoles Protected by SEM.<sup>a</sup>**

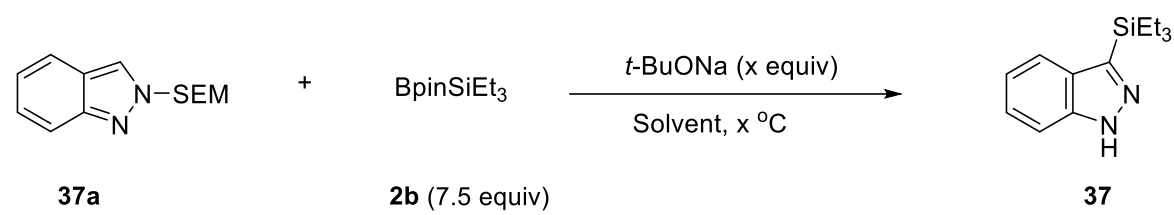

| Entry    | <i>t</i> -BuONa (equiv) | Temp (°C)  | Solvent              | Yield <sup>b</sup> |
|----------|-------------------------|------------|----------------------|--------------------|
| 1        | 4.0                     | 130        | THF                  | 52%                |
| 2        | 5.0                     | 130        | THF                  | 52%                |
| <b>3</b> | <b>6.0</b>              | <b>130</b> | THF                  | <b>(75%)</b>       |
| 4        | 7.0                     | 130        | THF                  | 67%                |
| 5        | 6.0                     | 120        | THF                  | 59%                |
| 6        | 6.0                     | 110        | THF                  | 63%                |
| 7        | 6.0                     | 130        | 2-Methoxyethyl ether | 63%                |
| 8        | 6.0                     | 130        | Cyclohexane          | 40%                |

<sup>a</sup>Reaction conditions (unless otherwise specified): **37a** (0.2 mmol, 1.0 equiv), **2b** (7.5 equiv), *t*-BuONa, Solvent (1.0 mL), 16 h, under an argon atmosphere. <sup>b</sup>Determined by <sup>1</sup>H NMR using mesitylene as an internal standard.

## Preparation of Indazoles

### General Procedure for the Synthesis of Indazoles Protected by Methyl:

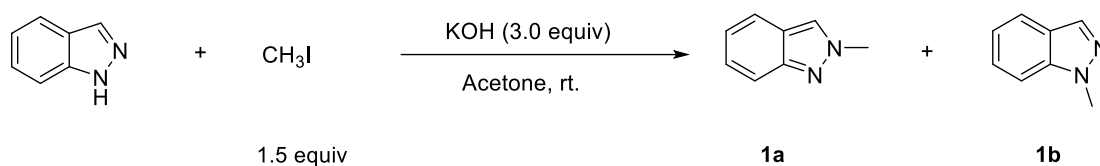

**General procedure:**<sup>[1]</sup> To a stirred of 1*H*-indazole (0.591 g, 5.0 mmol) in acetone (10.0 mL) at 0 °C was added potassium hydroxide (0.842 g, 15.0 mmol). After stirring for 1 h at 0 °C, MeI (0.47 mL, 7.5 mmol) was added to the flask, and the mixture was stirred for 15 h at 25 °C. The reaction mixture was filtered and extracted with ethyl acetate. Then the organic phase was dried over Na<sub>2</sub>SO<sub>4</sub> and concentrated in vacuo. The residue was purified by silica gel flash chromatography to afford the substrates **1a**.

### General Procedure for the Synthesis of *N*-Aryl-protected Indolines:

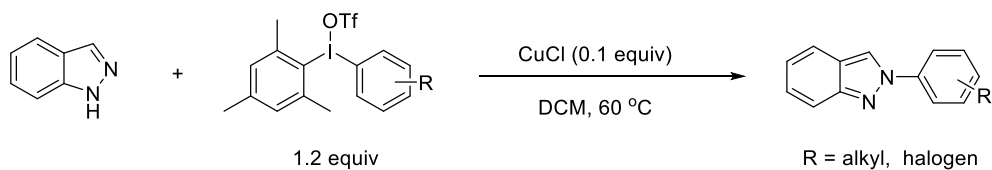

**General procedure:**<sup>[2]</sup> A mixture of corresponding Indazole (2.0 mmol, 1.0 equiv), the hypervalent iodine reagents (1.2 equiv), CuCl (0.1 equiv) in DCM (10.0 mL) under argon atmosphere was stirred for 24 h at 60 °C. The reaction mixture was filtered by diatomite with ethyl acetate. Then the organic phase was concentrated in vacuo and purified by silica gel flash chromatography to afford the substrates.

### General Procedure for the Synthesis of Indazoles protected by SEM with Substituents

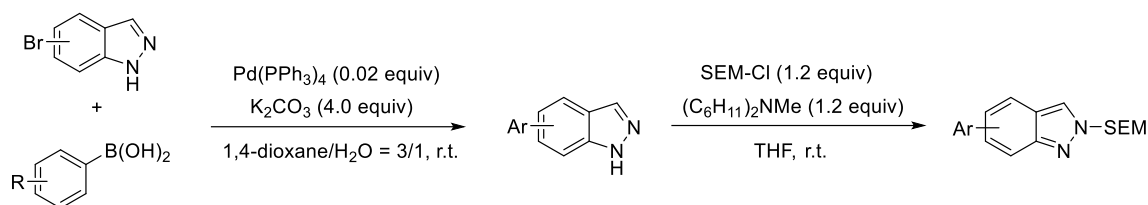

**General procedure:** A mixture of corresponding Bromoindazole (5.0 mmol, 1.0 equiv), Arylboronic acid (1.3 equiv), Pd(PPh<sub>3</sub>)<sub>4</sub> (0.02 equiv) and K<sub>2</sub>CO<sub>3</sub> (4.0 equiv) in 1,4-dioxane/H<sub>2</sub>O = 3/1 under argon atmosphere was stirred for 24 h at 100 °C. The reaction mixture was filtered and extracted with ethyl acetate. Then the organic phase was dried over Na<sub>2</sub>SO<sub>4</sub> and concentrated in vacuo. The residue was purified by silica gel flash chromatography to afford aryl-indazoles.

Dicyclohexyl methylamine (1.2 equiv) was added to the solution of aryl-indazole (1.5 mmol, 1.0 equiv) in THF (15 mL) in an oven-dried flask, followed by SEM-Cl (1.2 equiv) via syringe. The mixture was stirred at room temperature for 3 h and then diluted with ethyl acetate and quenched with 0.5 N NaOH. The organic layer was washed with brine and dried over Na<sub>2</sub>SO<sub>4</sub>. The residue which was concentrated in vacuo was purified by silica gel flash chromatography to obtain the substrates.

### General Procedure for Selective Silylation of Indazoles

A 25 mL flame-dried Schlenk tube equipped with a magnetic stir bar was charged with



*t*-BuONa (48.1 mg, 0.5 mmol, 2.5 equiv) in glove box. 2-Methylindazole (0.2 mmol), fresh distilled silylborane **2b** (250  $\mu$ L, 0.94 mmol, 4.7 equiv), fresh distilled cyclohexane (1.0 mL) was then added under argon atmosphere. The reaction mixture was allowed to stir at 70  $^{\circ}$ C for 16 h. The cooled solution was quenched with saturated NH<sub>4</sub>Cl aqueous solution, then diluted with ethyl acetate and washed with brine. The organic phase was dried over Na<sub>2</sub>SO<sub>4</sub> and concentrated in vacuo. The residue was purified by silica gel flash chromatography to afford the corresponding compound (**1-36**).

**Procedure for The Silylation of Indazoles Protected by SEM:** A 25 mL flame-dried Schlenk tube equipped with a magnetic stir bar was charged with *t*-BuONa (115.3 mg, 1.2 mmol, 6.0 equiv) in glove box. 2-((2-(trimethylsilyl)ethoxy)methyl)-2*H*-indazole (0.2 mmol), fresh distilled silylborane **2b** (400  $\mu$ L, 1.5 mmol, 7.5 equiv), fresh distilled THF (1.0 mL) were then added under argon atmosphere. The reaction mixture was allowed to stir at 130  $^{\circ}$ C for 16 h. The cooled solution was quenched with saturated NH<sub>4</sub>Cl aqueous solution, then diluted with ethyl acetate and washed with brine. The organic phase was dried over Na<sub>2</sub>SO<sub>4</sub> and concentrated in vacuo. The residue was purified by silica gel flash chromatography to afford the corresponding compound (**37-41**).

### Gram-scale experimental procedures

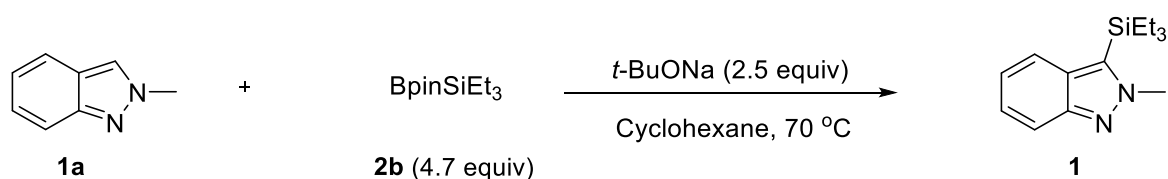

**Procedure:** To a 100 mL of Schlenk tube equipped with a magnetic stir bar, *t*-BuONa (1.826 g, 19.0 mmol) was added in glove box, followed by **1a** (1.0 g, 7.6 mmol) and BpinSiEt<sub>3</sub> (9.5 mL, 35.72 mmol), then fresh distilled cyclohexane (38.0 mL). The reaction mixture was heated at 70  $^{\circ}$ C for 16 h. The cooled solution was quenched with saturated NH<sub>4</sub>Cl aqueous solution, then diluted with ethyl acetate and washed with brine. The organic phase was dried over Na<sub>2</sub>SO<sub>4</sub> and concentrated in vacuum. The crude

mixture can be isolated by silica gel flash chromatography to afford the corresponding products **1** (1.68 g, 90%).

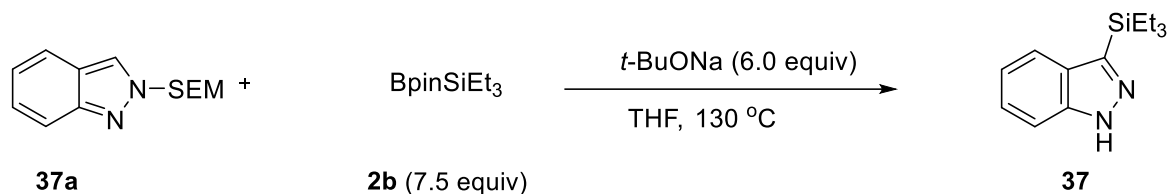

**Procedure:** To a 100 mL of Schlenk tube equipped with a magnetic stir bar, *t*-BuONa (2.324 g, 24.2 mmol) was added in glove box, followed by **37a** (1.0 g, 4.0 mmol) and BpinSiEt<sub>3</sub> (8.0 mL, 30.0 mmol), then fresh distilled THF (20.0 mL). The reaction mixture was heated at 130 °C for 16 h. The cooled solution was quenched with saturated NH<sub>4</sub>Cl aqueous solution, then diluted with ethyl acetate and washed with brine. The organic phase was dried over Na<sub>2</sub>SO<sub>4</sub> and concentrated in vacuum. The crude mixture can be isolated by silica gel flash chromatography to afford the corresponding products **37** (0.648 g, 69%).

### Experimental Procedures for Transformations.

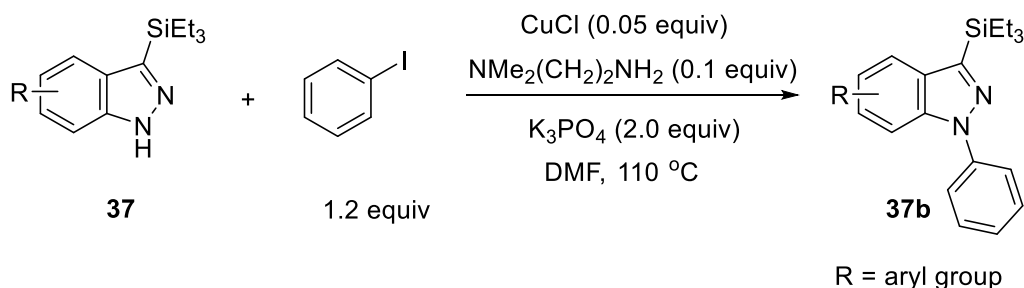

**General Procedure:** To a 25 mL of Schlenk tube equipped with a magnetic stir bar, CuCl (1.0 mg, 0.01 mmol), K<sub>3</sub>PO<sub>4</sub> (84.9 mg, 0.4 mmol) were added in glove box. **37** (46.5 mg, 0.2 mmol), iodobenzene (49.0 mg, 0.24 mmol), N,N-Dimethylethylenediamine (1.8 mg, 0.02 mmol), dry solvent DMF (1.0 mL) were then added under argon atmosphere. The reaction mixture was stirred at 110 °C for 16 h. The cooled solution was quenched with saturated NH<sub>4</sub>Cl aqueous solution, then diluted with ethyl acetate and washed with brine. The organic phase was dried over Na<sub>2</sub>SO<sub>4</sub> and concentrated in vacuo. The residue was purified by silica gel flash chromatography to afford the corresponding compound **37b** in 85% yield.

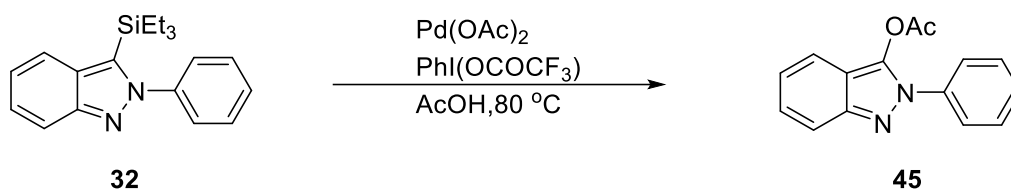

**General Procedure:**<sup>[3]</sup> A 25 mL flame-dried Schlenk tube equipped with a magnetic stir bar was charged with Pd(OAc)<sub>2</sub> (5 mmol%), PhI(OCOCF<sub>3</sub>) (1.5 equiv). **32** (30.8 mg, 0.1 mmol), AcOH (0.5 mL) were then added under argon atmosphere. The reaction mixture was allowed to stir at 80 °C for 17 h. The reaction mixture was poured into aqueous NaHCO<sub>3</sub> solution and extract with ethyl acetate (20 mL×3). The combined organic extract was dried over anhydrous Na<sub>2</sub>SO<sub>4</sub> and concentrated under a reduced pressure. The product **45** was separated by column chromatography on silica gel with petroleum ether/AcOEt eluent (46% yield).

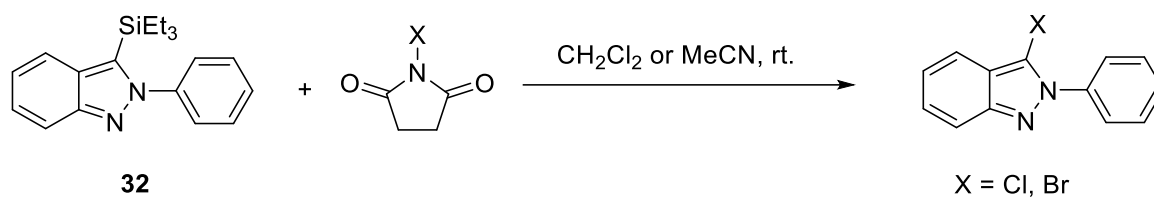

**General Procedure:**<sup>[4]</sup> A 25 mL flame-dried Schlenk tube equipped with a magnetic stir bar was charged with NXS (0.5 mmol, 5.0 equiv). **32** (30.8 mg, 0.1 mmol), fresh distilled CH<sub>2</sub>Cl<sub>2</sub> or MeCN (1.0 mL) were then added under argon atmosphere. The reaction mixture was allowed to stir at room temperature for 24 h. The reaction mixture was diluted with ethyl acetate. The residue was purified by silica gel flash chromatography to afford the corresponding compound **46** in 57% yield and **47** in 89% yield.

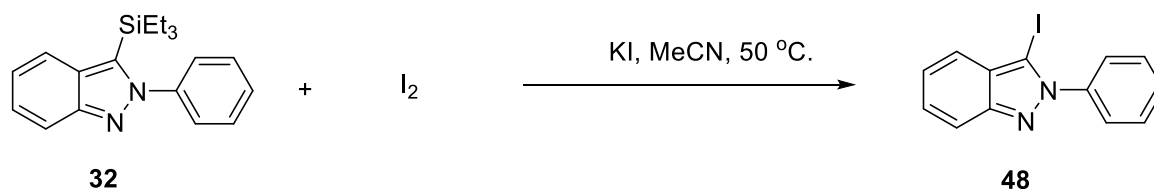

**General Procedure:** A 25 mL flame-dried Schlenk tube equipped with a magnetic stir bar was charged with I<sub>2</sub> (0.5 mmol, 5.0 equiv) and KI (0.2 mmol, 2 equiv). **32** (30.8 mg, 0.1 mmol), fresh distilled MeCN (1.0 mL) were then added under argon atmosphere.

The reaction mixture was allowed to stir at 50 °C for 12 h. The reaction mixture was diluted with ethyl acetate. The residue was purified by silica gel flash chromatography to afford the corresponding compound **48** in 50% yield.

## Mechanistic studies

### Radical inhibition experiments

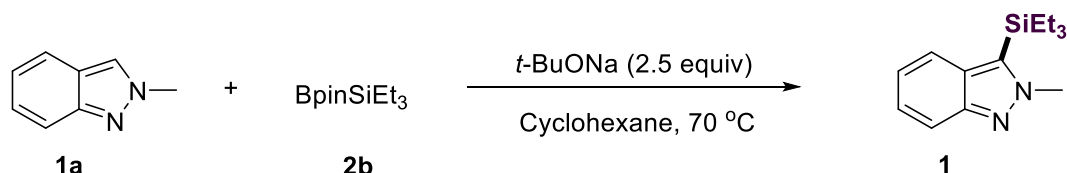

| Entry | Additive (equiv) | Yield <sup>b</sup> |
|-------|------------------|--------------------|
| 1     | TEMPO (2.0)      | 13%                |
| 2     | BHT (1.0)        | trace              |

<sup>a</sup>Reaction conditions: **1a** (0.2 mmol, 1.0 equiv), **2b** (4.7 equiv), TEMPO (2.0 equiv) or BHT (1.0 equiv), *t*-BuONa (2.5 equiv), Cyclohexane (1.0 mL), 70 °C, 16 h, under an argon atmosphere.

<sup>b</sup>Determined by <sup>1</sup>H NMR using mesitylene as an internal standard.

### Radical clock experiments

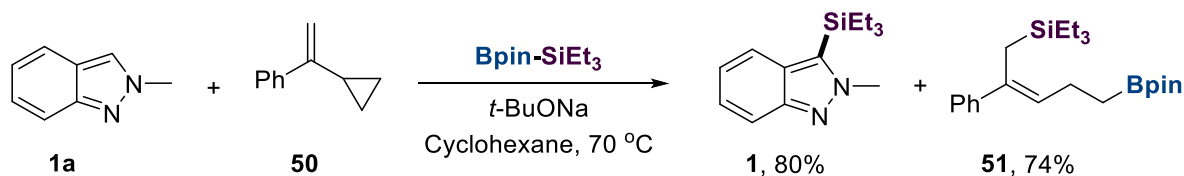

A 25 mL flame-dried Schlenk tube equipped with a magnetic stir bar was charged with *t*-BuONa (48.1 mg, 0.5 mmol, 2.5 equiv) in glove box. 2-Methylindazole (0.2 mmol), (1-Cyclopropylvinyl)benzene **50** (31 μL, 0.2 mmol, 1.0 equiv), fresh distilled silylborane **2b** (250 μL, 0.94 mmol, 4.7 equiv), fresh distilled cyclohexane (1.0 mL) were then added under argon atmosphere. The reaction mixture was allowed to stir at 70 °C for 16 h. The cooled solution was quenched with saturated NH<sub>4</sub>Cl aqueous solution, then diluted with ethyl acetate and washed with brine. The organic phase was dried over Na<sub>2</sub>SO<sub>4</sub> and concentrated in vacuo. The residue was purified by silica gel flash chromatography to afford the silylated ring-opening product **51**.

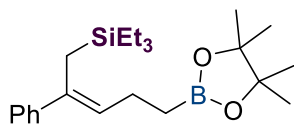

**(Z)-triethyl(2-phenyl-5-(4,4,5,5-tetramethyl-1,3,2-dioxaborolan-2-yl)pent-2-en-1-yl)silane (51).** This compound is known<sup>[7]</sup>. The product **51** (57.1mg, 74% yield) as a light yellow oil was purified with silica gel chromatography. <sup>1</sup>H NMR (400 MHz, CDCl<sub>3</sub>) δ 7.30 (d, *J* = 6.8 Hz, 2 H), 7.21 (t, *J* = 7.2 Hz, 2 H), 7.18 (t, *J* = 7.6 Hz, 1 H), 5.43 (t, *J* = 7.2 Hz, 1 H), 2.24 (q, *J* = 8.0 Hz, 2 H), 1.99 (s, 2 H), 1.24 (s, 12 H), 0.93 (t, *J* = 7.8 Hz, 2 H), 0.81 (t, *J* = 8.0 Hz, 9 H), 0.35 (q, *J* = 8.0 Hz, 6 H).

**Conclusion:** When the radical scavenger TEMPO, or radical inhibitor BHT was added under the standard silylation reaction conditions, drastically diminished yields were observed. These results suggest that a radical pathway might be involved.

#### Characterization Data for Silylated Products:

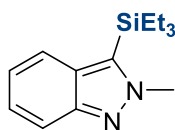

**2-Methyl-3-(triethylsilyl)-2H-indazole (1).** The product **1** (43.9 mg, 89% yield) as a yellow oil was purified with silica gel chromatography. <sup>1</sup>H NMR (400 MHz, CDCl<sub>3</sub>) δ 7.77-7.74 (m, 2 H), 7.31-7.27 (m, 1 H), 7.10-7.06 (m, 1 H), 4.31 (s, 3 H), 1.09-0.97 (m, 15 H). <sup>13</sup>C NMR (100 MHz, CDCl<sub>3</sub>) δ 148.6, 132.9, 130.7, 125.3, 121.4, 121.3, 117.3, 41.5, 7.3, 4.1. FTMS (ESI): Calculated for C<sub>14</sub>H<sub>23</sub>N<sub>2</sub>Si (M+H<sup>+</sup>): 247.1625; Found: 247.1619.

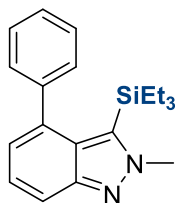

**2-Methyl-4-phenyl-3-(triethylsilyl)-2H-indazole (2).** The product **2** (53.5 mg, 83% yield) as a white solid was purified with silica gel chromatography. <sup>1</sup>H NMR (400 MHz, CDCl<sub>3</sub>) δ 7.73 (d, *J* = 8.8 Hz, 1 H), 7.49 (d, *J* = 6.8 Hz, 2 H), 7.43-7.35 (m, 3 H), 7.32-7.28 (m, 1 H), 6.95 (d, *J* = 6.8 Hz, 1 H), 4.35 (s, 3 H), 0.79 (t, *J* = 8.0 Hz, 9 H), 0.48 (q,

$J = 8.0$  Hz, 6 H).  $^{13}\text{C}$  NMR (100 MHz,  $\text{CDCl}_3$ )  $\delta$  149.5, 143.7, 136.7, 133.8, 129.5, 129.1, 128.4, 127.3, 125.1, 124.0, 116.4, 42.9, 7.8, 4.5. FTMS (ESI): Calculated for  $\text{C}_{20}\text{H}_{27}\text{N}_2\text{Si}$  ( $\text{M}+\text{H}^+$ ): 323.1938; Found: 323.1936.

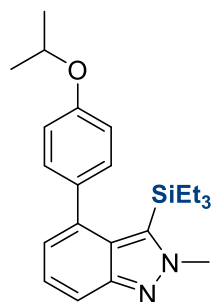

**4-(4-Isopropoxyphenyl)-2-methyl-3-(triethylsilyl)-2H-indazole (3).** The product **3** (57.9 mg, 76% yield) as a white solid was purified with silica gel chromatography.  $^1\text{H}$  NMR (400 MHz,  $\text{CDCl}_3$ )  $\delta$  7.70 (dd,  $J = 8.8$  Hz,  $J = 0.8$  Hz, 1 H), 7.39-7.36 (m, 2 H), 7.28 (dd,  $J = 8.4$  Hz,  $J = 7.2$  Hz, 1 H), 6.96-6.91 (m, 3 H), 4.64-4.58 (m, 1 H), 4.34 (s, 3 H), 1.37 (d,  $J = 6.0$  Hz, 6 H), 0.80 (t,  $J = 8.0$  Hz, 9 H), 0.51 (q,  $J = 8.0$  Hz, 6 H).  $^{13}\text{C}$  NMR (100 MHz,  $\text{CDCl}_3$ )  $\delta$  157.3, 149.5, 136.5, 136.2, 133.9, 130.0, 129.7, 125.1, 123.7, 116.1, 115.9, 70.1, 42.8, 21.9, 7.8, 4.6. FTMS (ESI): Calculated for  $\text{C}_{23}\text{H}_{33}\text{N}_2\text{OSi}$  ( $\text{M}+\text{H}^+$ ): 381.2356; Found: 381.2344.

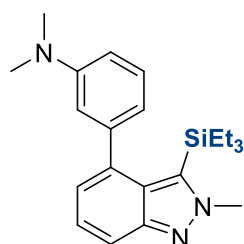

***N,N*-dimethyl-3-(2-methyl-3-(triethylsilyl)-2H-indazol-4-yl)aniline (4).** The product **4** (60.7 mg, 83% yield) as a yellow oil was purified with silica gel chromatography.  $^1\text{H}$  NMR (400 MHz,  $\text{CDCl}_3$ )  $\delta$  7.72 (d,  $J = 8.4$  Hz, 1 H), 7.31-7.24 (m, 2 H), 7.00 (d,  $J = 6.8$  Hz, 1 H), 6.88-6.84 (m, 2 H), 6.77 (dd,  $J = 8.0$  Hz,  $J = 2.4$  Hz, 1 H), 4.35 (s, 3 H), 2.97 (s, 6 H), 0.81 (t,  $J = 8.0$  Hz, 9 H), 0.52 (q,  $J = 8.0$  Hz, 6 H).  $^{13}\text{C}$  NMR (100 MHz,  $\text{CDCl}_3$ )  $\delta$  150.7, 149.4, 144.3, 137.6, 133.9, 129.6, 128.8, 125.0, 123.5,

118.1, 116.1, 113.3, 111.7, 42.9, 40.7, 7.9, 4.4. FTMS (ESI): Calculated for  $C_{22}H_{32}N_3Si$  ( $M+H^+$ ): 366.2360; Found: 366.2349.

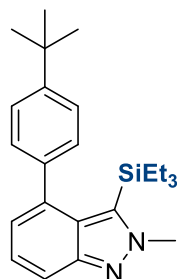

**4-(4-(*Tert*-butyl)phenyl)-2-methyl-3-(triethylsilyl)-2*H*-indazole (5).** The product **5** (53.8 mg, 71% yield) as a yellow solid was purified with silica gel chromatography.  $^1H$  NMR (400 MHz,  $CDCl_3$ )  $\delta$  7.72 (d,  $J = 8.8$  Hz, 1 H), 7.43 (dd,  $J = 14.4$  Hz,  $J = 8.4$  Hz, 4 H), 7.31-7.27 (m, 1 H), 6.96 (d,  $J = 6.8$  Hz, 1 H), 4.35 (s, 3 H), 1.39 (s, 9 H), 0.79 (t,  $J = 8.0$  Hz, 9 H), 0.48 (q,  $J = 8.0$  Hz, 6 H).  $^{13}C$  NMR (100 MHz,  $CDCl_3$ )  $\delta$  150.5, 149.5, 140.8, 136.7, 133.9, 129.8, 128.7, 125.3, 125.0, 123.5, 116.1, 42.8, 34.6, 31.4, 7.8, 4.4. FTMS (ESI): Calculated for  $C_{24}H_{35}N_2Si$  ( $M+H^+$ ): 379.2564; Found: 379.2549.

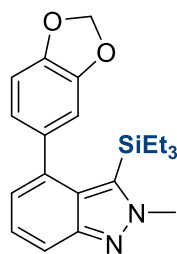

**4-(Benzo[*d*][1,3]dioxol-5-yl)-2-methyl-3-(triethylsilyl)-2*H*-indazole (6).** The product **6** (51.3 mg, 70% yield) as a yellow solid was purified with silica gel chromatography.  $^1H$  NMR (400 MHz,  $CDCl_3$ )  $\delta$  7.71 (d,  $J = 8.4$  Hz, 1 H), 7.30-7.27 (m, 1 H), 6.97-6.92 (m, 3 H), 6.87 (d,  $J = 7.6$  Hz, 1 H), 6.02 (s, 2 H), 4.35 (s, 3 H), 0.83 (t,  $J = 8.0$  Hz, 9 H), 0.57 (q,  $J = 8.0$  Hz, 6 H).  $^{13}C$  NMR (100 MHz,  $CDCl_3$ )  $\delta$  149.5, 147.6, 147.0, 137.8, 136.2, 133.8, 129.6, 125.1, 123.6, 122.3, 116.2, 109.6, 108.4, 101.1, 42.9, 7.8, 4.6. FTMS (ESI): Calculated for  $C_{21}H_{27}N_2O_2Si$  ( $M+H^+$ ): 367.1836; Found: 367.1836.

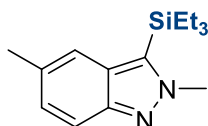

**2,5-Dimethyl-3-(triethylsilyl)-2H-indazole (7).** The product **7** (49.5 mg, 95% yield) as a colourless oil was purified with silica gel chromatography.  $^1\text{H}$  NMR (400 MHz,  $\text{CDCl}_3$ )  $\delta$  7.64 (d,  $J = 8.8$  Hz, 1 H), 7.49 (s, 1 H), 7.11 (d,  $J = 8.8$  Hz, 1 H), 4.26 (s, 3 H), 2.43 (s, 3 H), 1.07-0.98 (m, 15 H).  $^{13}\text{C}$  NMR (100 MHz,  $\text{CDCl}_3$ )  $\delta$  147.4, 131.8, 131.1, 130.5, 128.0, 119.6, 116.9, 41.4, 22.0, 7.3, 4.0. FTMS (ESI): Calculated for  $\text{C}_{15}\text{H}_{25}\text{N}_2\text{Si}$  ( $\text{M}+\text{H}^+$ ): 261.1781; Found: 261.1771.

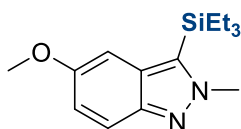

**5-Methoxy-2-methyl-3-(triethylsilyl)-2H-indazole (8).** The product **8** (47.0 mg, 85% yield) as a yellow oil was purified with silica gel chromatography.  $^1\text{H}$  NMR (400 MHz,  $\text{CDCl}_3$ )  $\delta$  7.64 (d,  $J = 9.6$  Hz, 1 H), 7.00-6.97 (m, 2 H), 4.23 (s, 3 H), 3.83 (s, 3 H), 1.05-0.99 (m, 15 H).  $^{13}\text{C}$  NMR (100 MHz,  $\text{CDCl}_3$ )  $\delta$  154.8, 145.1, 131.3, 130.8, 119.4, 118.5, 98.6, 55.3, 41.4, 7.3, 4.1. FTMS (ESI): Calculated for  $\text{C}_{15}\text{H}_{25}\text{N}_2\text{OSi}$  ( $\text{M}+\text{H}^+$ ): 277.1730; Found: 277.1720.

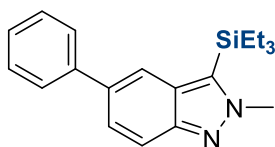

**2-Methyl-5-phenyl-3-(triethylsilyl)-2H-indazole (9).** The product **9** (47.1 mg, 73% yield) as a yellow oil was purified with silica gel chromatography.  $^1\text{H}$  NMR (400 MHz,  $\text{CDCl}_3$ )  $\delta$  7.95 (s, 1 H), 7.83 (d,  $J = 8.8$  Hz, 1 H), 7.65 (d,  $J = 7.2$  Hz, 2 H), 7.57 (dd,  $J = 8.8$  Hz,  $J = 1.6$  Hz, 1 H), 7.47 (t,  $J = 7.6$  Hz, 2 H), 7.35 (t,  $J = 7.4$  Hz, 1 H), 4.32 (s, 3 H), 1.12-1.01 (m, 15 H).  $^{13}\text{C}$  NMR (100 MHz,  $\text{CDCl}_3$ )  $\delta$  148.1, 142.2, 134.6, 133.6, 131.2, 128.7, 127.3, 126.7, 125.9, 119.4, 117.6, 41.5, 7.4, 4.1. FTMS (ESI): Calculated for  $\text{C}_{20}\text{H}_{27}\text{N}_2\text{Si}$  ( $\text{M}+\text{H}^+$ ): 323.1938; Found: 323.1937.



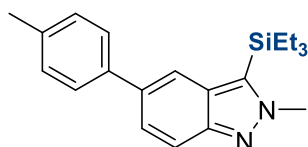

**2-Methyl-5-(*p*-tolyl)-3-(triethylsilyl)-2*H*-indazole (10).** The product **10** (54.5 mg, 81% yield) as a colourless oil was purified with silica gel chromatography.  $^1\text{H}$  NMR (400 MHz,  $\text{CDCl}_3$ )  $\delta$  7.92 (s, 1 H), 7.81 (d,  $J = 9.2$  Hz, 1 H), 7.57-7.53 (m, 3 H), 7.28 (d,  $J = 7.6$  Hz, 2 H), 4.31 (s, 3 H), 2.42 (s, 3 H), 1.12-1.00 (m, 15 H).  $^{13}\text{C}$  NMR (100 MHz,  $\text{CDCl}_3$ )  $\delta$  148.0, 139.3, 136.4, 134.5, 133.4, 131.2, 129.4, 127.1, 126.0, 119.0, 117.5, 41.5, 21.1, 7.4, 4.1. FTMS (ESI): Calculated for  $\text{C}_{21}\text{H}_{29}\text{N}_2\text{Si}$  ( $\text{M}+\text{H}^+$ ): 337.2094; Found: 337.2097.

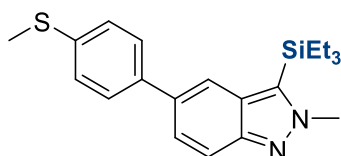

**2-Methyl-5-(4-(methylthio)phenyl)-3-(triethylsilyl)-2*H*-indazole (11).** The product **11** (61.9 mg, 84% yield) as a yellow solid was purified with silica gel chromatography.  $^1\text{H}$  NMR (400 MHz,  $\text{CDCl}_3$ )  $\delta$  7.90 (s, 1 H), 7.81 (d,  $J = 8.8$  Hz, 1 H), 7.56 (d,  $J = 8.4$  Hz, 2 H), 7.53 (d,  $J = 9.2$  Hz, 1 H), 7.36 (d,  $J = 8.4$  Hz, 2 H), 4.31 (s, 3 H), 2.53 (s, 3 H), 1.11-1.01 (m, 15 H).  $^{13}\text{C}$  NMR (100 MHz,  $\text{CDCl}_3$ )  $\delta$  148.1, 139.1, 136.8, 133.9, 133.5, 131.2, 127.6, 127.1, 125.6, 119.0, 117.7, 41.5, 16.1, 7.4, 4.1. FTMS (ESI): Calculated for  $\text{C}_{21}\text{H}_{29}\text{N}_2\text{SSi}$  ( $\text{M}+\text{H}^+$ ): 369.1815; Found: 369.1811.

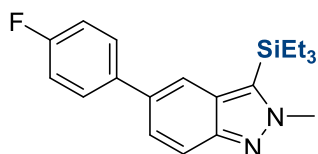

**5-(4-Fluorophenyl)-2-methyl-3-(triethylsilyl)-2*H*-indazole (12).** The product **12** (59.2 mg, 87% yield) as a yellow oil was purified with silica gel chromatography.  $^1\text{H}$  NMR (400 MHz,  $\text{CDCl}_3$ )  $\delta$  7.87 (s, 1 H), 7.81 (d,  $J = 8.8$  Hz, 1 H), 7.59-7.56 (m, 2 H), 7.51-7.48 (m, 1 H), 7.15 (t,  $J = 8.6$  Hz, 2 H), 4.31 (s, 3 H), 1.12-1.00 (m, 15 H).  $^{13}\text{C}$  NMR (100 MHz,  $\text{CDCl}_3$ )  $\delta$  162.1 (d,  $J = 244.0$  Hz), 147.9, 138.3, 133.6, 131.1, 128.7

(d,  $J = 8.0$  Hz), 125.8, 119.2, 117.7, 115.6, 115.4, 41.5, 7.4, 4.1. FTMS (ESI): Calculated for  $C_{20}H_{26}FN_2Si$  ( $M+H^+$ ): 341.1843; Found: 341.1843.

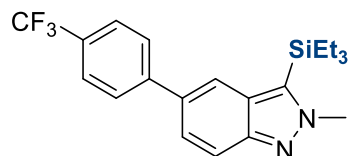

**2-Methyl-3-(triethylsilyl)-5-(4-(trifluoromethyl)phenyl)-2H-indazole (13).** The product **13** (35.1 mg, 45% yield) as a yellow oil was purified with silica gel chromatography.  $^1H$  NMR (400 MHz,  $CDCl_3$ )  $\delta$  7.95 (s, 1 H), 7.84 (d,  $J = 9.2$  Hz, 1 H), 7.71 (t,  $J = 9.4$  Hz, 4 H), 7.54 (dd,  $J = 9.2$  Hz,  $J = 1.6$  Hz, 1 H), 4.32 (s, 3 H), 1.12-1.00 (m, 15 H).  $^{13}C$  NMR (100 MHz,  $CDCl_3$ )  $\delta$  148.1, 145.7, 134.3, 133.2, 131.0, 128.7 (d,  $J = 33.0$  Hz), 127.5, 125.7 (q,  $J = 3.3$  Hz), 124.4 (q,  $J = 243$  Hz), 123.0, 120.1, 117.9, 41.6, 7.4, 4.1. FTMS (ESI): Calculated for  $C_{21}H_{26}F_3N_2Si$  ( $M+H^+$ ): 391.1811; Found: 391.1810.

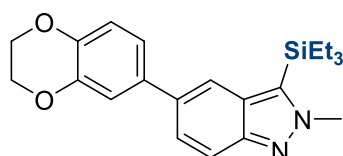

**5-(2,3-Dihydrobenzo[b][1,4]dioxin-6-yl)-2-methyl-3-(triethylsilyl)-2H-indazole (14).** The product **14** (70.8 mg, 93% yield) as a yellow oil was purified with silica gel chromatography.  $^1H$  NMR (400 MHz,  $CDCl_3$ )  $\delta$  7.86 (s, 1 H), 7.78 (d,  $J = 8.8$  Hz, 1 H), 7.50 (d,  $J = 8.8$  Hz, 1 H), 7.15 (d,  $J = 2.0$  Hz, 1 H), 7.13 (dd,  $J = 8.4$  Hz,  $J = 2.0$  Hz, 1 H), 6.96 (d,  $J = 8.4$  Hz, 1 H), 4.31 (s, 4 H), 4.30 (s, 3 H), 1.11-0.99 (m, 15 H).  $^{13}C$  NMR (100 MHz,  $CDCl_3$ )  $\delta$  147.9, 143.5, 142.7, 135.8, 133.9, 133.3, 131.1, 125.8, 120.3, 118.7, 117.5, 115.9, 64.4, 64.3, 41.5, 7.3, 4.0. FTMS (ESI): Calculated for  $C_{22}H_{29}N_2O_2Si$  ( $M+H^+$ ): 381.1992; Found: 381.1995.

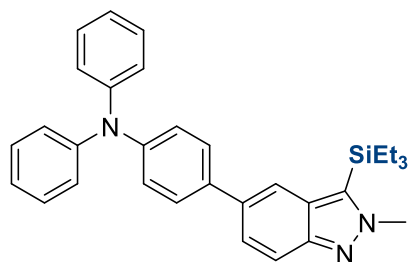

**4-(2-Methyl-3-(triethylsilyl)-2H-indazol-5-yl)-N, N-diphenylaniline (15).** The product **15** (82.3 mg, 84% yield) as a yellow solid was purified with silica gel chromatography.  $^1\text{H}$  NMR (400 MHz,  $\text{CDCl}_3$ )  $\delta$  7.90 (s, 1 H), 7.79 (d,  $J = 8.8$  Hz, 1 H), 7.55-7.50 (m, 3 H), 7.26 (t,  $J = 7.8$  Hz, 4 H), 7.17-7.14 (m, 6 H), 7.02 (t,  $J = 7.4$  Hz, 2 H), 4.29 (s, 3 H), 1.11-0.99 (m, 15 H).  $^{13}\text{C}$  NMR (100 MHz,  $\text{CDCl}_3$ )  $\delta$  147.9, 147.7, 146.6, 136.1, 134.0, 133.4, 131.2, 129.2, 127.8, 125.7, 124.2, 124.1, 122.7, 118.5, 117.5, 41.5, 7.4, 4.1. FTMS (ESI): Calculated for  $\text{C}_{32}\text{H}_{36}\text{N}_3\text{Si}$  ( $\text{M}+\text{H}^+$ ): 490.2673; Found: 490.2672.

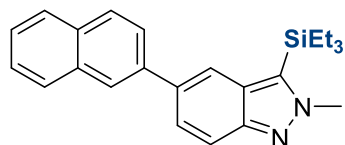

**2-Methyl-5-(naphthalen-2-yl)-3-(triethylsilyl)-2H-indazole (16).** The product **16** (70.0 mg, 94% yield) as a yellow oil was purified with silica gel chromatography.  $^1\text{H}$  NMR (400 MHz,  $\text{CDCl}_3$ )  $\delta$  8.08 (s, 2 H), 7.97-7.94 (m, 2 H), 7.91 (s, 1 H), 7.88 (s, 1 H), 7.82 (dd,  $J = 8.4$  Hz,  $J = 1.6$  Hz, 1 H), 7.72 (dd,  $J = 8.8$  Hz,  $J = 1.2$  Hz, 1 H), 7.55-7.48 (m, 2 H), 4.34 (s, 3 H), 1.16-1.04 (m, 15 H).  $^{13}\text{C}$  NMR (100 MHz,  $\text{CDCl}_3$ )  $\delta$  148.1, 139.5, 134.5, 133.7, 133.6, 132.3, 131.2, 128.3, 128.1, 127.6, 126.2, 126.1, 125.9, 125.7, 125.6, 119.7, 117.7, 41.5, 7.4, 4.1. FTMS (ESI): Calculated for  $\text{C}_{24}\text{H}_{29}\text{N}_2\text{Si}$  ( $\text{M}+\text{H}^+$ ): 373.2094; Found: 373.2096.

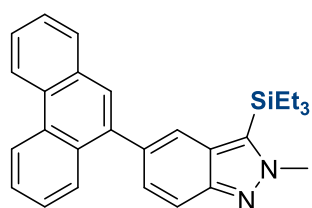

**2-Methyl-5-(phenanthren-9-yl)-3-(triethylsilyl)-2H-indazole (17).** The product **17** (70.2 mg, 83% yield) as a white solid was purified with silica gel chromatography.  $^1\text{H}$  NMR (400 MHz,  $\text{CDCl}_3$ )  $\delta$  8.81 (d,  $J = 8.0$  Hz, 1 H), 8.75 (d,  $J = 8.4$  Hz, 1 H), 8.02 (d,  $J = 8.4$  Hz, 1 H), 7.95 (d,  $J = 7.2$  Hz, 2 H), 7.90 (d,  $J = 8.8$  Hz, 1 H), 7.79 (s, 1 H), 7.71-7.62 (m, 3 H), 7.56 (t,  $J = 7.6$  Hz, 1 H), 7.50 (d,  $J = 8.8$  Hz, 1 H), 4.37 (s, 3 H), 1.08-1.01 (m, 15 H).  $^{13}\text{C}$  NMR (100 MHz,  $\text{CDCl}_3$ )  $\delta$  148.0, 139.5, 133.9, 133.5, 131.6, 131.5, 130.9, 130.6, 129.8, 128.6, 128.5, 127.6, 127.1, 126.8, 126.4, 126.3, 122.8, 122.5, 122.1, 116.8, 41.6, 7.4, 4.1. FTMS (ESI): Calculated for  $\text{C}_{28}\text{H}_{31}\text{N}_2\text{Si}$  ( $\text{M}+\text{H}^+$ ): 423.2251; Found: 423.2255.

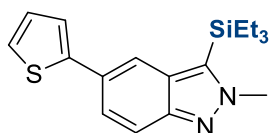

**2-Methyl-5-(thiophen-2-yl)-3-(triethylsilyl)-2H-indazole (18).** The product **18** (48.0 mg, 73% yield) as a yellow oil was purified with silica gel chromatography.  $^1\text{H}$  NMR (400 MHz,  $\text{CDCl}_3$ )  $\delta$  7.98 (s, 1 H), 7.75 (d,  $J = 8.8$  Hz, 1 H), 7.57 (dd,  $J = 8.8$  Hz,  $J = 1.6$  Hz, 1 H), 7.29 (d,  $J = 2.8$  Hz, 1 H), 7.25 (d,  $J = 5.6$  Hz, 1 H), 7.08 (dd,  $J = 5.2$  Hz,  $J = 3.6$  Hz, 1 H), 4.28 (s, 3 H), 1.11-0.99 (m, 15 H).  $^{13}\text{C}$  NMR (100 MHz,  $\text{CDCl}_3$ )  $\delta$  148.1, 145.6, 133.7, 130.9, 127.9, 127.8, 125.0, 124.0, 122.5, 118.1, 117.8, 41.5, 7.4, 4.1. FTMS (ESI): Calculated for  $\text{C}_{18}\text{H}_{25}\text{N}_2\text{SSi}$  ( $\text{M}+\text{H}^+$ ): 329.1502; Found: 329.1489.

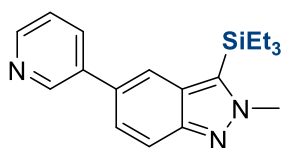

**2-Methyl-5-(pyridin-3-yl)-3-(triethylsilyl)-2H-indazole (19).** The product **19** (50.5 mg, 78% yield) as a yellow solid was purified with silica gel chromatography.  $^1\text{H}$  NMR (400 MHz,  $\text{CDCl}_3$ )  $\delta$  8.90 (s, 1 H), 8.58 (d,  $J = 4.0$  Hz, 1 H), 7.93-7.91 (m, 2 H), 7.85 (d,  $J = 8.8$  Hz, 1 H), 7.50 (dd,  $J = 8.8$  Hz,  $J = 1.6$  Hz, 1 H), 7.40 (dd,  $J = 7.6$  Hz,  $J = 4.8$  Hz, 1 H), 4.31 (s, 3 H), 1.11-0.97 (m, 15 H).  $^{13}\text{C}$  NMR (100 MHz,  $\text{CDCl}_3$ )  $\delta$  148.2,

148.1, 147.6, 137.7, 134.6, 134.1, 131.1, 130.9, 125.2, 123.6, 119.9, 118.2, 41.6, 7.3, 4.0. FTMS (ESI): Calculated for  $C_{19}H_{26}N_3Si$  ( $M+H^+$ ): 324.1890; Found: 324.1882.

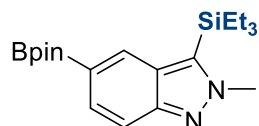

**2-Methyl-5-(4,4,5,5-tetramethyl-1,3,2-dioxaborolan-2-yl)-3-(triethylsilyl)-2H-indazole (20).** The product **20** (31.9 mg, 65% yield) as a brown solid was purified with silica gel chromatography.  $^1H$  NMR (400 MHz,  $CDCl_3$ )  $\delta$  8.28 (s, 1 H), 7.71-7.64 (m, 2 H), 4.29 (s, 3 H), 1.35 (s, 12 H), 1.11-1.05 (m, 6 H), 1.01-0.97 (m, 9 H).  $^{13}C$  NMR (100 MHz,  $CDCl_3$ )  $\delta$  149.7, 134.6, 130.5, 130.3, 130.2, 116.1, 83.5, 41.4, 24.8, 7.3, 3.9. FTMS (ESI): Calculated for  $C_{20}H_{34}BN_2O_2Si$  ( $M+H^+$ ): 373.2481; Found: 373.2465.

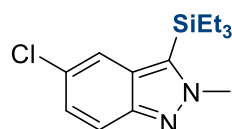

**5-Chloro-2-methyl-3-(triethylsilyl)-2H-indazole (21).** The product **21** (24.2 mg, 43% yield) as a brown solid was purified with silica gel chromatography.  $^1H$  NMR (400 MHz,  $CDCl_3$ )  $\delta$  7.70 (d,  $J = 1.6$  Hz, 1 H), 7.67 (d,  $J = 8.8$  Hz, 1 H), 7.20 (dd,  $J = 9.2$  Hz,  $J = 2.0$  Hz, 1 H), 4.27 (s, 3 H), 1.06-0.96 (m, 15 H).  $^{13}C$  NMR (100 MHz,  $CDCl_3$ )  $\delta$  146.9, 132.9, 131.1, 127.0, 126.6, 120.2, 118.8, 41.6, 7.3, 3.9. FTMS (ESI): Calculated for  $C_{14}H_{22}ClN_2Si$  ( $M+H^+$ ): 281.1235; Found: 281.1235.

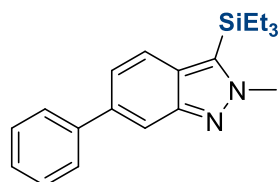

**2-Methyl-6-phenyl-3-(triethylsilyl)-2H-indazole (22).** The product **22** (61.3 mg, 95% yield) as a yellow oil was purified with silica gel chromatography.  $^1H$  NMR (400 MHz,  $CDCl_3$ )  $\delta$  7.97 (s, 1 H), 7.85 (d,  $J = 9.2$  Hz, 1 H), 7.70 (d,  $J = 7.6$  Hz, 2 H), 7.47 (t,  $J = 7.6$  Hz, 2 H), 7.39-7.35 (m, 2 H), 4.32 (s, 3 H), 1.12-1.01 (m, 15 H).  $^{13}C$  NMR (100

MHz, CDCl<sub>3</sub>)  $\delta$  149.1, 141.7, 138.4, 133.0, 130.0, 128.7, 127.3, 127.0, 121.9, 121.7, 115.0, 41.5, 7.3, 4.0. FTMS (ESI): Calculated for C<sub>20</sub>H<sub>27</sub>N<sub>2</sub>Si (M+H<sup>+</sup>): 323.1938; Found: 323.1926.

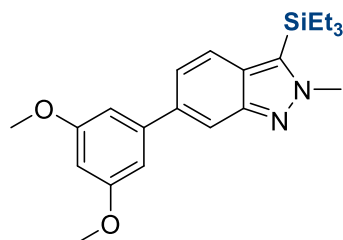

**6-(3,5-Dimethoxyphenyl)-2-methyl-3-(triethylsilyl)-2H-indazole (23).** The product **23** (68.7 mg, 90% yield) as a yellow oil was purified with silica gel chromatography. <sup>1</sup>H NMR (400 MHz, CDCl<sub>3</sub>)  $\delta$  7.94 (s, 1 H), 7.81 (d, *J* = 8.8 Hz, 1 H), 7.34 (d, *J* = 8.8 Hz, 1 H), 6.83 (d, *J* = 2.0 Hz, 2 H), 6.48 (s, 1 H), 4.31 (s, 3 H), 3.86 (s, 6 H), 1.11-0.99 (m, 15 H). <sup>13</sup>C NMR (100 MHz, CDCl<sub>3</sub>)  $\delta$  160.9, 149.0, 143.9, 138.4, 133.1, 130.2, 121.9, 121.6, 115.1, 105.5, 99.1, 55.4, 41.5, 7.3, 4.0. FTMS (ESI): Calculated for C<sub>22</sub>H<sub>31</sub>N<sub>2</sub>O<sub>2</sub>Si (M+H<sup>+</sup>): 383.2149; Found: 383.2139.

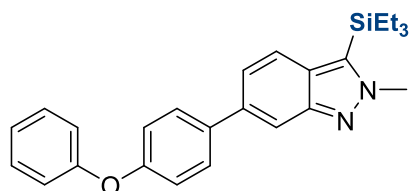

**2-Methyl-6-(4-phenoxyphenyl)-3-(triethylsilyl)-2H-indazole (24).** The product **24** (67.2 mg, 81% yield) as a yellow oil was purified with silica gel chromatography. <sup>1</sup>H NMR (400 MHz, CDCl<sub>3</sub>)  $\delta$  7.92 (s, 1 H), 7.83 (d, *J* = 8.8 Hz, 1 H), 7.64 (d, *J* = 8.8 Hz, 2 H), 7.39-7.33 (m, 3 H), 7.15-7.08 (m, 5 H), 4.31 (s, 1 H), 1.12-1.00 (m, 15 H). <sup>13</sup>C NMR (100 MHz, CDCl<sub>3</sub>)  $\delta$  157.1, 156.7, 149.1, 137.8, 136.7, 133.2, 129.8, 129.7, 128.6, 123.3, 121.8, 121.7, 119.0, 118.9, 114.5, 41.5, 7.3, 4.0. FTMS (ESI): Calculated for C<sub>26</sub>H<sub>31</sub>N<sub>2</sub>O<sub>2</sub>Si (M+H<sup>+</sup>): 415.2200; Found: 415.2209.

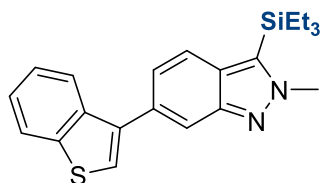

**6-(Benzo[*b*]thiophen-3-yl)-2-methyl-3-(triethylsilyl)-2*H*-indazole (25).** The product **25** (56.8 mg, 75% yield) as a yellow solid was purified with silica gel chromatography.  $^1\text{H}$  NMR (400 MHz,  $\text{CDCl}_3$ )  $\delta$  8.06-8.03 (m, 1 H), 7.98 (s, 1 H), 7.95-7.93 (m, 1 H), 7.87 (d,  $J = 8.4$  Hz, 1 H), 7.48 (s, 1 H), 7.41-7.39 (m, 2 H), 7.34 (d,  $J = 8.8$  Hz, 1 H), 4.34 (s, 3 H), 1.14-1.02 (m, 15 H).  $^{13}\text{C}$  NMR (100 MHz,  $\text{CDCl}_3$ )  $\delta$  148.9, 140.6, 138.5, 138.0, 133.3, 133.1, 130.1, 124.3, 124.2, 123.3, 123.2, 122.8, 121.7, 116.6, 41.5, 7.4, 4.0. FTMS (ESI): Calculated for  $\text{C}_{22}\text{H}_{27}\text{N}_2\text{SSi}$  ( $\text{M}+\text{H}^+$ ): 379.1658; Found: 379.1658.

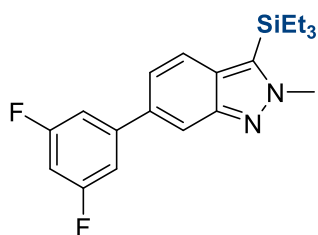

**6-(3,5-Difluorophenyl)-2-methyl-3-(triethylsilyl)-2*H*-indazole (26).** The product **26** (45.2 mg, 63% yield) as a light yellow solid was purified with silica gel chromatography.  $^1\text{H}$  NMR (400 MHz,  $\text{CDCl}_3$ )  $\delta$  7.91 (s, 1 H), 7.83 (d,  $J = 8.8$  Hz, 1 H), 7.27 (d,  $J = 8.4$  Hz, 1 H), 7.18 (d,  $J = 6.8$  Hz, 2 H), 6.78 (t,  $J = 8.0$  Hz, 1 H), 4.31 (s, 3 H), 1.11-1.00 (m, 15 H).  $^{13}\text{C}$  NMR (100 MHz,  $\text{CDCl}_3$ )  $\delta$  163.2 (dd,  $J = 246.0$ ,  $J = 13.0$ ), 148.8, 145.1 (t,  $J = 9.5$ ), 136.1, 133.4, 130.4, 122.2, 121.1, 115.5, 110.1 (dd,  $J = 18.0$ ,  $J = 7.0$ ), 102.2 (t,  $J = 26.0$ ), 41.6, 7.3, 4.0. FTMS (ESI): Calculated for  $\text{C}_{20}\text{H}_{25}\text{F}_2\text{N}_2\text{Si}$  ( $\text{M}+\text{H}^+$ ): 359.1749; Found: 359.1734.

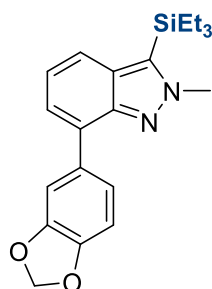

**7-(Benzo[*d*][1,3]dioxol-5-yl)-2-methyl-3-(triethylsilyl)-2*H*-indazole (27).** The product **27** (41.8 mg, 57% yield) as a yellow oil was purified with silica gel chromatography. <sup>1</sup>H NMR (400 MHz, CDCl<sub>3</sub>) δ 7.73 (d, *J* = 8.4 Hz, 1 H), 7.58 (d, *J* = 1.6 Hz, 1 H), 7.48 (dd, *J* = 8.0 Hz, *J* = 1.6 Hz, 1 H), 7.33 (d, *J* = 6.8 Hz, 1 H), 7.13 (dd, *J* = 8.4 Hz, *J* = 7.2 Hz, 1 H), 6.94 (d, *J* = 8.0 Hz, 1 H), 6.01 (s, 2 H), 4.32 (s, 3 H), 1.11-0.99 (m, 15 H). <sup>13</sup>C NMR (100 MHz, CDCl<sub>3</sub>) δ 147.5, 146.9, 146.8, 133.0, 131.6, 130.2, 123.6, 122.4, 121.7, 120.3, 109.6, 108.3, 100.9, 41.7, 7.4, 4.1. FTMS (ESI): Calculated for C<sub>21</sub>H<sub>27</sub>N<sub>2</sub>O<sub>2</sub>Si (M+H<sup>+</sup>): 367.1836; Found: 367.1831.

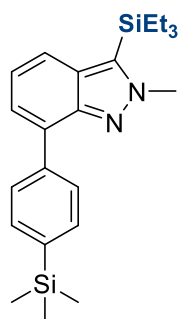

**2-Methyl-3-(triethylsilyl)-7-(4-(trimethylsilyl)phenyl)-2*H*-indazole (28).** The product **28** (62.3 mg, 79% yield) as a white solid was purified with silica gel chromatography. <sup>1</sup>H NMR (400 MHz, CDCl<sub>3</sub>) δ 7.96 (d, *J* = 8.4 Hz, 2 H), 7.76 (d, *J* = 8.4 Hz, 1 H), 7.65 (d, *J* = 8.0 Hz, 2 H), 7.41 (d, *J* = 7.6 Hz, 1 H), 7.17 (dd, *J* = 8.8 Hz, *J* = 7.2 Hz, 1 H), 4.34 (s, 3 H), 1.11-0.99 (m, 15 H), 0.31 (s, 9 H). <sup>13</sup>C NMR (100 MHz, CDCl<sub>3</sub>) δ 139.2, 139.1, 133.5, 131.5, 130.5, 128.2, 124.6, 121.9, 120.7, 41.7, 7.4, 4.1, -1.1. FTMS (ESI): Calculated for C<sub>23</sub>H<sub>35</sub>N<sub>2</sub>Si<sub>2</sub> (M+H<sup>+</sup>): 395.2333; Found: 395.2322.

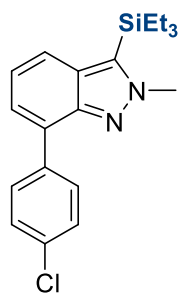

**7-(4-Chlorophenyl)-2-methyl-3-(triethylsilyl)-2*H*-indazole (29).** The product **29** (37.1 mg, 52% yield) as a white solid was purified with silica gel chromatography. <sup>1</sup>H



NMR (400 MHz, CDCl<sub>3</sub>)  $\delta$  7.96 (d,  $J$  = 8.8 Hz, 2 H), 7.77 (d,  $J$  = 8.4 Hz, 1 H), 7.45 (d,  $J$  = 8.4 Hz, 2 H), 7.38 (d,  $J$  = 6.8 Hz, 1 H), 7.16 (dd,  $J$  = 8.4 Hz,  $J$  = 7.2 Hz, 1 H), 4.32 (s, 3 H), 1.11-0.99 (m, 15 H). <sup>13</sup>C NMR (100 MHz, CDCl<sub>3</sub>)  $\delta$  146.6, 137.3, 133.4, 133.1, 131.6, 130.1, 129.2, 128.5, 124.1, 121.7, 121.1, 41.8, 7.4, 4.1. FTMS (ESI): Calculated for C<sub>20</sub>H<sub>26</sub>ClN<sub>2</sub>Si (M+H<sup>+</sup>): 357.1548; Found: 357.1544.

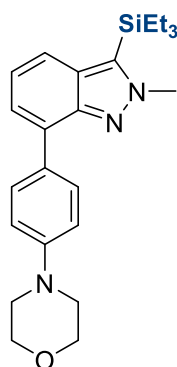

**4-(4-(2-Methyl-3-(triethylsilyl)-2H-indazol-7-yl)phenyl)morpholine (30).** The product **30** (33.4 mg, 41% yield) as a light yellow solid was purified with silica gel chromatography. <sup>1</sup>H NMR (400 MHz, CDCl<sub>3</sub>)  $\delta$  7.97 (d,  $J$  = 8.8 Hz, 2 H), 7.71 (dd,  $J$  = 8.8 Hz,  $J$  = 0.8 Hz, 1 H), 7.36 (dd,  $J$  = 6.8 Hz,  $J$  = 0.8 Hz, 1 H), 7.14 (dd,  $J$  = 8.4 Hz,  $J$  = 6.8 Hz, 1 H), 7.05 (d,  $J$  = 8.4 Hz, 2 H), 4.32 (s, 3 H), 3.90 (t,  $J$  = 4.6 Hz, 4 H), 3.23 (t,  $J$  = 4.8 Hz, 4 H), 1.10-0.98 (m, 15 H). <sup>13</sup>C NMR (100 MHz, CDCl<sub>3</sub>)  $\delta$  146.9, 132.8, 131.7, 130.2, 129.6, 123.1, 121.8, 119.9, 115.7, 66.9, 49.4, 41.8, 7.4, 4.1. FTMS (ESI): Calculated for C<sub>24</sub>H<sub>34</sub>N<sub>3</sub>OSi (M+H<sup>+</sup>): 408.2465; Found: 408.2452.

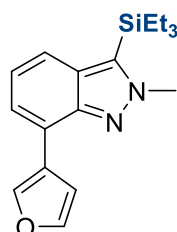

**7-(Furan-3-yl)-2-methyl-3-(triethylsilyl)-2H-indazole (31).** The product **31** (29.4 mg, 47% yield) as a brown oil was purified with silica gel chromatography. <sup>1</sup>H NMR (400 MHz, CDCl<sub>3</sub>)  $\delta$  7.73 (d,  $J$  = 7.2 Hz, 1 H), 7.69 (d,  $J$  = 8.4 Hz, 1 H), 7.54-7.53 (m, 1 H), 7.50 (d,  $J$  = 3.6 Hz, 1 H), 7.13 (dd,  $J$  = 8.4 Hz,  $J$  = 7.2 Hz, 1 H), 6.57 (q,  $J$  = 1.6 Hz, 1 H), 4.35 (s, 3 H), 1.09-0.97 (m, 15 H). <sup>13</sup>C NMR (100 MHz, CDCl<sub>3</sub>)  $\delta$  151.6, 144.4,

141.7, 133.3, 131.5, 121.5, 120.5, 120.1, 119.8, 111.8, 109.8, 41.7, 7.3, 4.0. FTMS (ESI): Calculated for C<sub>18</sub>H<sub>25</sub>N<sub>2</sub>OSi (M+H<sup>+</sup>): 313.1730; Found: 313.1722.

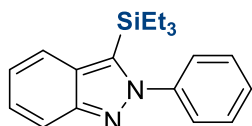

**2-Phenyl-3-(triethylsilyl)-2H-indazole (32).** The product **32** (54.9 mg, 89% yield) as a yellow oil was purified with silica gel chromatography. <sup>1</sup>H NMR (400 MHz, CDCl<sub>3</sub>) δ 7.88-7.83 (m, 2 H), 7.53-7.48 (m, 5 H), 7.37-7.33 (m, 1 H), 7.16-7.12 (m, 1 H), 0.86 (t, *J* = 8.0 Hz, 9 H), 0.69 (q, *J* = 8.0 Hz, 6 H). <sup>13</sup>C NMR (100 MHz, CDCl<sub>3</sub>) δ 149.1, 142.8, 134.9, 130.7, 129.4, 128.7, 126.9, 126.0, 121.9, 121.8, 117.8, 7.3, 3.9. FTMS (ESI): Calculated for C<sub>19</sub>H<sub>25</sub>N<sub>2</sub>Si (M+H<sup>+</sup>): 309.1781; Found: 309.1782.

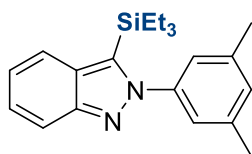

**2-(3,5-Dimethylphenyl)-3-(triethylsilyl)-2H-indazole (33).** The product **33** (41.1 mg, 61% yield) as a yellow oil was purified with silica gel chromatography. <sup>1</sup>H NMR (400 MHz, CDCl<sub>3</sub>) δ 7.84 (dd, *J* = 11.2 Hz, *J* = 8.4 Hz, 2 H), 7.35-7.31 (m, 1 H), 7.14-7.11 (m, 4 H), 2.39 (s, 6 H), 0.87 (t, *J* = 8.0 Hz, 9 H), 0.71 (q, *J* = 8.0 Hz, 6 H). <sup>13</sup>C NMR (100 MHz, CDCl<sub>3</sub>) δ 149.0, 142.5, 138.4, 134.5, 130.8, 130.7, 125.8, 124.8, 121.8, 121.6, 117.8, 21.1, 7.3, 4.0. FTMS (ESI): Calculated for C<sub>21</sub>H<sub>29</sub>N<sub>2</sub>Si (M+H<sup>+</sup>): 337.2094; Found: 337.2091.

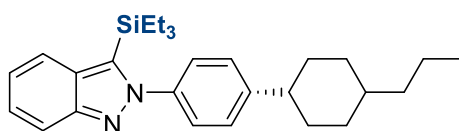

**2-(4-(4-Propylcyclohexyl)phenyl)-3-(triethylsilyl)-2H-indazole (34).** The product **34** (70.1 mg, 81% yield) as a yellow oil was purified with silica gel chromatography. <sup>1</sup>H NMR (400 MHz, CDCl<sub>3</sub>) δ 7.86-7.81 (m, 2 H), 7.38 (d, *J* = 8.0 Hz, 2 H), 7.35-7.30 (m, 3 H), 7.13 (t, *J* = 7.6 Hz, 1 H), 2.58 (t, *J* = 12.2 Hz, 1 H), 1.92 (t, *J* = 15.0 Hz, 4 H),

1.54-1.45 (m, 2 H), 1.40-1.32 (m, 2 H), 1.26-1.22 (m, 3 H), 1.13-1.04 (m, 2 H), 0.92 (t,  $J = 7.2$  Hz, 3 H), 0.85 (t,  $J = 8.0$  Hz, 9 H), 0.69 (q,  $J = 8.0$  Hz, 6 H).  $^{13}\text{C}$  NMR (100 MHz,  $\text{CDCl}_3$ )  $\delta$  149.6, 148.9, 140.4, 135.0, 130.6, 127.0, 126.7, 126.0, 121.8, 121.7, 117.8, 44.4, 39.6, 37.0, 34.3, 33.4, 20.0, 14.4, 7.3, 4.0. FTMS (ESI): Calculated for  $\text{C}_{28}\text{H}_{41}\text{N}_2\text{Si}$  ( $\text{M}+\text{H}^+$ ): 433.3033; Found: 433.3021.

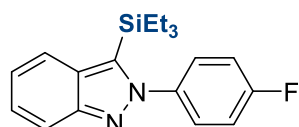

**2-(4-Fluorophenyl)-3-(triethylsilyl)-2H-indazole (35).** The product **35** (49.0 mg, 75% yield) as a white solid was purified with silica gel chromatography.  $^1\text{H}$  NMR (400 MHz,  $\text{CDCl}_3$ )  $\delta$  7.84 (dd,  $J = 13.6$  Hz,  $J = 8.8$  Hz, 2 H), 7.50-7.45 (m, 2 H), 7.37-7.33 (m, 1 H), 7.20 (t,  $J = 8.0$  Hz, 2 H), 7.16-7.12 (m, 1 H), 0.87 (t,  $J = 8.0$  Hz, 9 H), 0.71 (q,  $J = 8.0$  Hz, 6 H).  $^{13}\text{C}$  NMR (100 MHz,  $\text{CDCl}_3$ )  $\delta$  162.9 (d,  $J = 249.0$  Hz), 149.1, 139.0, 135.2, 130.7, 128.7, 128.6, 126.2, 122.0, 121.8, 117.8, 115.8, 115.5, 7.2, 3.9. FTMS (ESI): Calculated for  $\text{C}_{19}\text{H}_{24}\text{FN}_2\text{Si}$  ( $\text{M}+\text{H}^+$ ): 327.1687; Found: 327.1678.

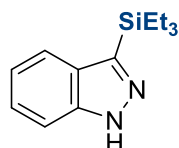

**3-(Triethylsilyl)-1H-indazole (36).** The product **36** (46.5 mg, 75% yield) as a brown solid was purified with silica gel chromatography.  $^1\text{H}$  NMR (400 MHz,  $\text{CDCl}_3$ )  $\delta$  7.84 (d,  $J = 8.0$  Hz, 1 H), 7.56 (d,  $J = 8.4$  Hz, 1 H), 7.38 (t,  $J = 7.6$  Hz, 1 H), 7.16 (t,  $J = 7.6$  Hz, 1 H), 1.08-0.97 (m, 15 H).  $^{13}\text{C}$  NMR (100 MHz,  $\text{CDCl}_3$ )  $\delta$  145.1, 140.7, 129.3, 126.2, 121.9, 120.6, 110.2, 7.5, 3.8. FTMS (ESI): Calculated for  $\text{C}_{13}\text{H}_{21}\text{N}_2\text{Si}$  ( $\text{M}+\text{H}^+$ ): 233.1468; Found: 233.1477.

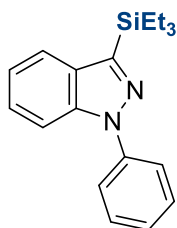

**1-Phenyl-3-(triethylsilyl)-1H-indazole (36b).** The product **36b** (52.4 mg, 85% yield) as a yellow oil was purified with silica gel chromatography.  $^1\text{H}$  NMR (400 MHz,  $\text{CDCl}_3$ )  $\delta$  7.89 (d,  $J = 9.2$  Hz, 1 H), 7.81-7.78 (m, 3 H), 7.55 (t,  $J = 8.0$  Hz, 2 H), 7.44-7.40 (m, 1 H), 7.36 (t,  $J = 7.4$  Hz, 1 H), 7.24-7.20 (m, 1 H), 1.12-1.02 (m, 15 H).  $^{13}\text{C}$  NMR (100 MHz,  $\text{CDCl}_3$ )  $\delta$  146.5, 140.4, 138.9, 131.7, 129.3, 126.4, 126.3, 122.7, 122.3, 121.0, 110.3, 7.6, 3.9. FTMS (ESI): Calculated for  $\text{C}_{19}\text{H}_{25}\text{N}_2\text{Si}$  ( $\text{M}+\text{H}^+$ ): 309.1781; Found: 309.1774.

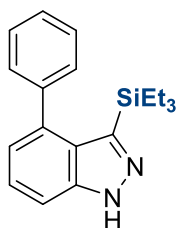

**4-Phenyl-3-(triethylsilyl)-1H-indazole (37).** The reaction was carried out according to the general procedure on 0.4 mmol scale. The product **37** (62 mg, 50% yield) as a brown solid was purified with silica gel chromatography.  $^1\text{H}$  NMR (400 MHz,  $\text{CDCl}_3$ )  $\delta$  7.60 (d,  $J = 8.4$  Hz, 1 H), 7.50-7.44 (m, 5 H), 7.40 (t,  $J = 7.6$  Hz, 1 H), 7.01 (d,  $J = 6.8$  Hz, 1 H), 0.82 (t,  $J = 8.0$  Hz, 9 H), 0.49 (q,  $J = 8.0$  Hz, 6 H).  $^{13}\text{C}$  NMR (100 MHz,  $\text{CDCl}_3$ )  $\delta$  142.3, 142.1, 137.5, 129.4, 128.8, 128.5, 128.2, 127.6, 125.7, 122.2, 109.7, 7.7, 3.4. FTMS (ESI): Calculated for  $\text{C}_{19}\text{H}_{25}\text{N}_2\text{Si}$  ( $\text{M}+\text{H}^+$ ): 309.1781; Found: 309.1790.

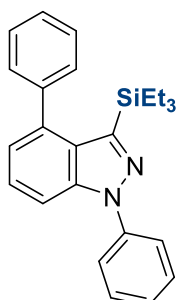

**1,4-Diphenyl-3-(triethylsilyl)-1H-indazole (37b).** The reaction was carried out according to the general procedure on 0.1 mmol scale. The product **37b** (17.1 mg, 44% yield) as a white solid was purified with silica gel chromatography.  $^1\text{H}$  NMR (400 MHz,  $\text{CDCl}_3$ )  $\delta$  7.79-7.77 (m, 3 H), 7.56 (t,  $J = 7.8$  Hz, 2 H), 7.52-7.43 (m, 5 H), 7.41-7.35 (m, 2 H), 7.05 (d,  $J = 7.2$  Hz, 1 H), 0.83 (t,  $J = 8.0$  Hz, 9 H), 0.47 (q,  $J = 8.0$  Hz, 6 H).  $^{13}\text{C}$  NMR (100 MHz,  $\text{CDCl}_3$ )  $\delta$  145.5, 142.1, 140.4, 139.7, 137.8, 130.4, 129.5, 129.4, 128.3, 127.7, 126.5, 125.8, 123.1, 122.7, 109.2, 7.8, 3.6. FTMS (ESI): Calculated for  $\text{C}_{25}\text{H}_{29}\text{N}_2\text{Si}$  ( $\text{M}+\text{H}^+$ ): 385.2094; Found: 385.2093.

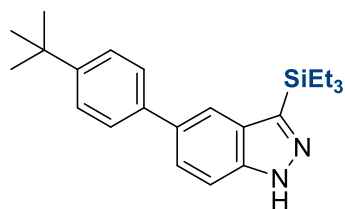

**5-(4-(tert-Butyl)phenyl)-3-(triethylsilyl)-1H-indazole (38).** The product **38** (51.2 mg, 70% yield) as a yellow oil was purified with silica gel chromatography.  $^1\text{H}$  NMR (400 MHz,  $\text{CDCl}_3$ )  $\delta$  7.99 (s, 1 H), 7.64 (s, 2 H), 7.59 (d,  $J = 8.4$  Hz, 2 H), 7.52 (d,  $J = 8.4$  Hz, 2 H), 1.40 (s, 9 H), 1.08-1.05 (m, 15 H).  $^{13}\text{C}$  NMR (100 MHz,  $\text{CDCl}_3$ )  $\delta$  149.8, 145.2, 138.9, 134.2, 132.1, 129.9, 127.1, 126.6, 125.8, 119.9, 110.6, 83.7, 31.4, 7.5, 3.8. FTMS (ESI): Calculated for  $\text{C}_{19}\text{H}_{25}\text{N}_2\text{Si}$  ( $\text{M}+\text{H}^+$ ): 365.2407; Found: 365.2398.

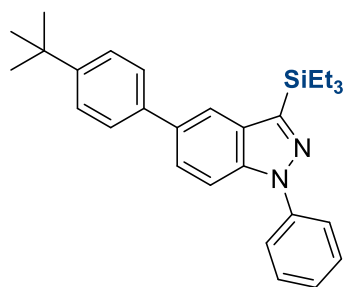

**5-(4-(tert-Butyl)phenyl)-1-phenyl-3-(triethylsilyl)-1H-indazole (38b).** The reaction was carried out according to the general procedure on 0.1 mmol scale. The product **38b** (34.9 mg, 79% yield) as a colourless oil was purified with silica gel chromatography.  $^1\text{H}$  NMR (400 MHz,  $\text{CDCl}_3$ )  $\delta$  8.02 (s, 1 H), 7.84-7.79 (m, 3 H), 7.66 (dd,  $J = 8.8$  Hz,  $J = 1.6$  Hz, 1 H), 7.61 (d,  $J = 8.4$  Hz, 2 H), 7.57-7.52 (m, 4 H), 7.36 (t,  $J = 7.4$  Hz, 1 H),

1.40 (s, 9 H), 1.12-1.03 (m, 15 H).  $^{13}\text{C}$  NMR (100 MHz,  $\text{CDCl}_3$ )  $\delta$  149.9, 146.9, 140.3, 138.7, 138.3, 134.5, 132.4, 129.4, 127.1, 126.5, 126.4, 125.8, 122.7, 120.2, 110.6, 34.5, 31.4, 7.6, 3.9. FTMS (ESI): Calculated for  $\text{C}_{29}\text{H}_{37}\text{N}_2\text{Si}$  ( $\text{M}+\text{H}^+$ ): 441.2720; Found: 441.2730.

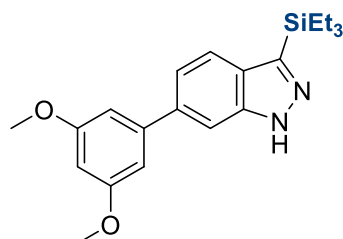

**6-(3,5-Dimethoxyphenyl)-3-(triethylsilyl)-1H-indazole (39).** The reaction was carried out according to the general procedure on 0.4 mmol scale. The product **39** (61.9 mg, 42% yield) as a yellow oil was purified with silica gel chromatography.  $^1\text{H}$  NMR (400 MHz,  $\text{CDCl}_3$ )  $\delta$  7.86 (d,  $J = 8.4$  Hz, 1 H), 7.72 (s, 1 H), 7.39 (dd,  $J = 8.4$  Hz,  $J = 1.2$  Hz, 1 H), 6.80 (d,  $J = 2.0$  Hz, 2 H), 6.50 (t,  $J = 2.2$  Hz, 1 H), 3.86 (s, 6 H), 1.08-1.01 (m, 15 H).  $^{13}\text{C}$  NMR (100 MHz,  $\text{CDCl}_3$ )  $\delta$  161.0, 145.1, 143.7, 141.3, 139.7, 128.8, 122.0, 121.0, 108.4, 105.9, 99.3, 55.4, 7.5, 3.8. FTMS (ESI): Calculated for  $\text{C}_{21}\text{H}_{29}\text{N}_2\text{O}_2\text{Si}$  ( $\text{M}+\text{H}^+$ ): 369.1992; Found: 369.1995.

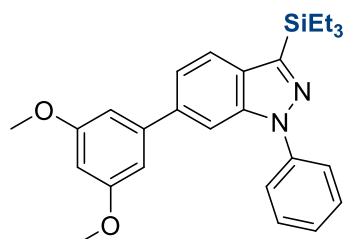

**6-(3,5-Dimethoxyphenyl)-1-phenyl-3-(triethylsilyl)-1H-indazole (39b).** The reaction was carried out according to the general procedure on 0.1 mmol scale. The product **39b** (32.5 mg, 73% yield) as a yellow oil was purified with silica gel chromatography.  $^1\text{H}$  NMR (400 MHz,  $\text{CDCl}_3$ )  $\delta$  7.91 (d,  $J = 8.0$  Hz, 2 H), 7.81-7.78 (m, 2 H), 7.56 (t,  $J = 7.6$  Hz, 2 H), 7.45-7.43 (m, 1 H), 7.37 (t,  $J = 7.4$  Hz, 1 H), 6.79 (d,  $J = 2.4$  Hz, 2 H), 6.51 (t,  $J = 2.2$  Hz, 1 H), 3.87 (s, 6 H), 1.14-1.02 (m, 15 H).  $^{13}\text{C}$  NMR (100 MHz,  $\text{CDCl}_3$ )  $\delta$  161.0, 146.5, 143.8, 140.3, 140.0, 139.5, 131.1, 129.4, 126.5,

122.9, 122.3, 121.3, 108.7, 106.1, 99.1, 55.4, 7.6, 3.9. FTMS (ESI): Calculated for  $C_{27}H_{33}N_2O_2Si$  ( $M+H^+$ ): 445.2305; Found: 445.2303.

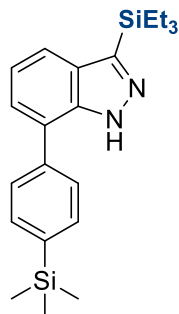

**3-(Triethylsilyl)-7-(4-(trimethylsilyl)phenyl)-1H-indazole (40).** The product **40** (61.7 mg, 81% yield) as a yellow oil was purified with silica gel chromatography.  $^1H$  NMR (400 MHz,  $CDCl_3$ )  $\delta$  7.84 (d,  $J = 7.6$  Hz, 1 H), 7.70 (dd,  $J = 10.8$  Hz,  $J = 8.4$  Hz, 4 H), 7.44 (d,  $J = 6.4$  Hz, 1 H), 7.30-7.28 (m, 1 H), 1.11-1.00 (m, 15 H), 0.36 (s, 9H).  $^{13}C$  NMR (100 MHz,  $CDCl_3$ )  $\delta$  146.0, 140.2, 138.9, 138.7, 134.3, 129.9, 127.1, 125.6, 124.9, 121.4, 121.1, 7.5, 3.8, 1.1. FTMS (ESI): Calculated for  $C_{22}H_{33}N_2Si_2$  ( $M+H^+$ ): 381.2176; Found: 381.2175.

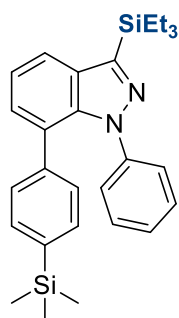

**1-Phenyl-3-(triethylsilyl)-7-(4-(trimethylsilyl)phenyl)-1H-indazole (40b).** The reaction was carried out according to the general procedure on 0.1 mmol scale. The product **40b** (19.8 mg, 43% yield) as a light yellow oil was purified with silica gel chromatography.  $^1H$  NMR (400 MHz,  $CDCl_3$ )  $\delta$  7.90 (dd,  $J = 8.8$  Hz,  $J = 0.8$  Hz, 1 H), 7.37 (dd,  $J = 8.2$  Hz,  $J = 1.0$  Hz, 1 H), 7.29 (t,  $J = 7.6$  Hz, 1 H), 7.15 (d,  $J = 8.0$  Hz, 2 H), 7.05-7.01 (m, 1 H), 6.99-6.97 (m, 6 H), 1.10-1.06 (m, 15 H), 0.24 (s, 9 H). FTMS (ESI): Calculated for  $C_{28}H_{37}N_2Si_2$  ( $M+H^+$ ): 457.2489; Found: 457.2488.

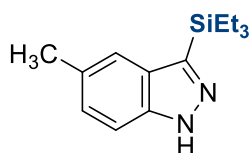

**5-Methyl-3-(triethylsilyl)-3a,7a-dihydro-1H-indazole (41).** The product **41** (36.3 mg, 73% yield) as a brown oil was purified with silica gel chromatography.  $^1\text{H}$  NMR (400 MHz,  $\text{CDCl}_3$ )  $\delta$  7.56 (s, 1H), 7.43 (d,  $J = 8.4$  Hz, 1H), 7.19 (d,  $J = 8.3$  Hz, 1H), 2.47 (s, 3H), 1.07-0.95 (m, 15H).  $^{13}\text{C}$  NMR (100 MHz,  $\text{CDCl}_3$ )  $\delta$  144.3, 139.6, 129.9, 129.8, 128.3, 120.9, 109.9, 21.5, 7.5, 3.8. HRMS (ESI): Calculated for  $\text{C}_{27}\text{H}_{45}\text{Si}$  ( $\text{M}+\text{H}$ ) $^+$ :247.1625; Found: 247.1631.

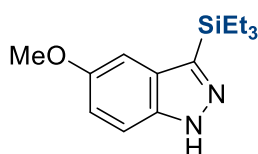

**5-Methoxy-3-(triethylsilyl)-3a,7a-dihydro-1H-indazole (42).** The product **42** (36.3 mg, 61% yield) as a brown oil was purified with silica gel chromatography.  $^1\text{H}$  NMR (400 MHz,  $\text{CDCl}_3$ )  $\delta$  7.46 (d,  $J = 8.9$  Hz, 1H), 7.14 (s, 1H), 7.05 (d,  $J = 9.1$  Hz, 1H), 3.86 (s, 3H), 1.07-0.96 (m, 15H).  $^{13}\text{C}$  NMR (100 MHz,  $\text{CDCl}_3$ )  $\delta$  154.5, 142.9, 137.6, 129.7, 118.3, 111.9, 101.3, 55.7, 7.5, 3.8. HRMS (ESI): Calculated for  $\text{C}_{27}\text{H}_{45}\text{Si}$  ( $\text{M}+\text{H}$ ) $^+$ :263.1574; Found: 263.1580.

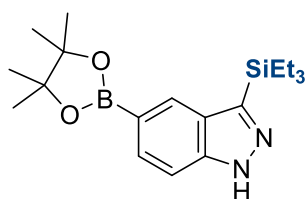

**5-(4,4,5,5-tetramethyl-1,3,2-dioxaborolan-2-yl)-3-(triethylsilyl)-1H-indazole(43).** The product **43** (39.4 mg, 55% yield) as a brown oil was purified with silica gel chromatography.  $^1\text{H}$  NMR (400 MHz,  $\text{CDCl}_3$ )  $\delta$  8.28 (s, 1H), 7.14 (s, 1H), 7.78 (d,  $J = 8.4$  Hz, 1H), 1.36 (s, 12H), 1.02 (s, 15H).  $^{13}\text{C}$  NMR (100 MHz,  $\text{CDCl}_3$ )  $\delta$  146.5, 142.3, 132.0, 129.9, 129.2, 109.2, 83.7, 24.9, 7.5, 3.8. HRMS (ESI): Calculated for  $\text{C}_{27}\text{H}_{45}\text{Si}$  ( $\text{M}+\text{H}$ ) $^+$ :359.2321; Found: 359.2326.



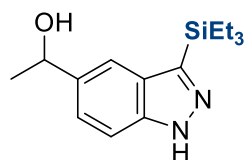

**5-(4,4,5,5-tetramethyl-1,3,2-dioxaborolan-2-yl)-3-(triethylsilyl)-1H-indazole(44).**

The product **44** (35.4 mg, 64% yield) as a brown oil was purified with silica gel chromatography.  $^1\text{H}$  NMR (400 MHz,  $\text{CDCl}_3$ ) 7.76 (s, 1H), 7.52 (d,  $J = 8.6$  Hz, 1H), 7.42 (d,  $J = 8.5$  Hz, 1H), 5.02 (q,  $J = 6.4$  Hz, 1H), 1.56 (d,  $J = 6.4$  Hz, 3H), 1.04-0.94 (m, 15H).  $^{13}\text{C}$  NMR (100 MHz,  $\text{CDCl}_3$ )  $\delta$  144.9, 138.4, 129.3, 124.5, 118.2, 116.4, 110.6, 75.1, 24.8, 7.4, 3.8. HRMS (ESI): Calculated for  $\text{C}_{27}\text{H}_{45}\text{Si}$  ( $\text{M}+\text{H}$ ) $^+$ :277.1731; Found: 277.1736.

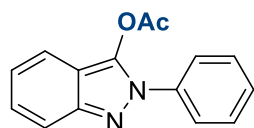

**2-Phenyl-2H-indazol-3-yl acetate (45).** The reaction was carried out according to the general procedure on 0.1 mmol scale. The product **45** (11.9 mg, 46% yield) as a light yellow oil was purified with silica gel chromatography.  $^1\text{H}$  NMR (400 MHz,  $\text{CDCl}_3$ )  $\delta$  8.24 (s, 1 H), 7.78 (d,  $J = 8.8$  Hz, 1 H), 7.73 (t,  $J = 8.6$  Hz, 2 H), 7.49 (t,  $J = 8.0$  Hz, 1 H), 7.42 (t,  $J = 7.6$  Hz, 1 H), 7.34 (d,  $J = 7.2$  Hz, 1 H), 7.30 (d,  $J = 8.4$  Hz, 1 H), 7.13 (t,  $J = 7.6$  Hz, 1 H), 2.16 (s, 3 H).  $^{13}\text{C}$  NMR (100 MHz,  $\text{CDCl}_3$ )  $\delta$  168.7, 149.5, 143.8, 129.5, 126.8, 126.7, 124.1, 124.0, 122.4, 122.1, 120.4, 117.9, 20.8. FTMS (ESI): Calculated for  $\text{C}_{15}\text{H}_{12}\text{N}_2\text{NaO}_2$  ( $\text{M}+\text{Na}^+$ ): 275.0791; Found: 275.0799.

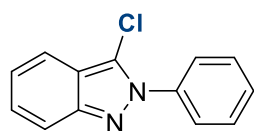

**3-Chloro-2-phenyl-2H-indazole (46).** This compound is known<sup>[5]</sup>. The reaction was carried out according to the general procedure on 0.1 mmol scale. The product **46** (13.1 mg, 57% yield) as a light yellow solid was purified with silica gel chromatography.  $^1\text{H}$  NMR (400 MHz,  $\text{CDCl}_3$ )  $\delta$  7.68 (t,  $J = 8.6$  Hz, 1H), 7.62 (s, 1H), 7.59-7.50 (m, 4 H), 7.29 (dd,  $J = 9.2$  Hz,  $J = 1.2$  Hz, 1H).  $^{13}\text{C}$  NMR (100 MHz,  $\text{CDCl}_3$ )  $\delta$  146.8, 138.1,

129.4, 129.2, 129.1, 128.5, 125.6, 120.2, 119.8, 117.74, 117.68.

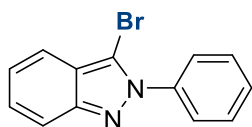

**3-Bromo-2-phenyl-2H-indazole (47).** This compound is known<sup>[5]</sup>. The reaction was carried out according to the general procedure on 0.1 mmol scale. The product **47** (24.2 mg, 89% yield) as a light yellow solid was purified with silica gel chromatography. <sup>1</sup>H NMR (400 MHz, CDCl<sub>3</sub>) δ 7.75 (d, *J* = 8.8 Hz, 1 H), 7.69-7.65 (m, 2 H), 7.61-7.50 (m, 4 H), 7.40-7.36 (m, 1 H), 7.21-7.17 (m, 1 H). <sup>13</sup>C NMR (100 MHz, CDCl<sub>3</sub>) δ 149.0, 139.1, 129.3, 129.1, 127.7, 126.2, 123.0, 122.8, 119.7, 118.1, 106.4.

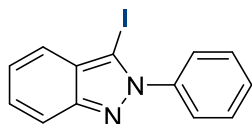

**3-Iodo-2-phenyl-2H-indazole (48).** This compound is known<sup>[6]</sup>. The reaction was carried out according to the general procedure on 0.1 mmol scale. The product **48** (15.9 mg, 50% yield) as a reddish-brown oil was purified with silica gel chromatography. <sup>1</sup>H NMR (400 MHz, CDCl<sub>3</sub>) δ 7.75 (d, *J* = 8.8 Hz, 1 H), 7.66-7.64 (m, 2 H), 7.59-7.53 (m, 3 H), 7.50 (d, *J* = 8.4 Hz, 1 H), 7.39 (t, *J* = 7.8 Hz, 1 H), 7.19 (t, *J* = 7.2 Hz, 1 H). <sup>13</sup>C NMR (100 MHz, CDCl<sub>3</sub>) δ 150.0, 140.5, 129.4, 129.0, 128.2, 127.6, 126.7, 123.2, 121.1, 118.3.

## References

- [1] Han, S. J.; Kim, H. T.; Joo, J. M. Direct C-H alkenylation of functionalized pyrazoles. *J. Org. Chem.* **2016**, *81*, 689.
- [2] Zhang, R.; Liu, Z.; Peng, Q.; Zhou, Y.; Xu, L.; Pan, X. Access to 2-substituted-2H-indazoles via a copper-catalyzed regioselective cross-coupling reaction. *Org. Biomol. Chem.* **2018**, *16*, 1816.
- [3] Gondo, K.; Oyamada, J.; Kitamura, T. Palladium-catalyzed desilylative acyloxylation of silicon-carbon bonds on (trimethylsilyl) arenes: Synthesis of phenol derivatives from trimethylsilylarenes. *Org. Lett.* **2015**, *17*, 4778.

- [4] Zarate, C.; Nakajima, M.; Martin, R. A mild and ligand-free Ni-catalyzed silylation via C-OMe cleavage. *J. Am. Chem. Soc.* **2017**, *139*, 1191.
- [5] Liu, X.; Wu, Z.; Feng, C.; Liu, W.; Li, M.; Shen, Z. Catalyst-and Oxidant-Free Electrochemical Halogenation Reactions of 2H-Indazoles with NaX (X=Cl, Br). *Eur. J. Org. Chem.* **2022**, *2022*, e202200262.
- [6] Fang, Y.; Wu, C.; Larock, R. C.; Shi, F. Synthesis of 2H-indazoles by the [3+2] dipolar cycloaddition of sydnone with arynes. *J. Org. Chem.* **2011**, *76*, 8840.
- [7] Sun, M.; Tao, M.; Zhao, L.; Li, W.; Liu, Z.; He, C.-Y.; Feng, Z. Iron-catalyzed C–F bond silylation and borylation of fluoroarenes. *Org. Chem. Front.* **2011**, *8*, 5322.

## 2-Methyl-3-(triethylsilyl)-2H-indazole (1)

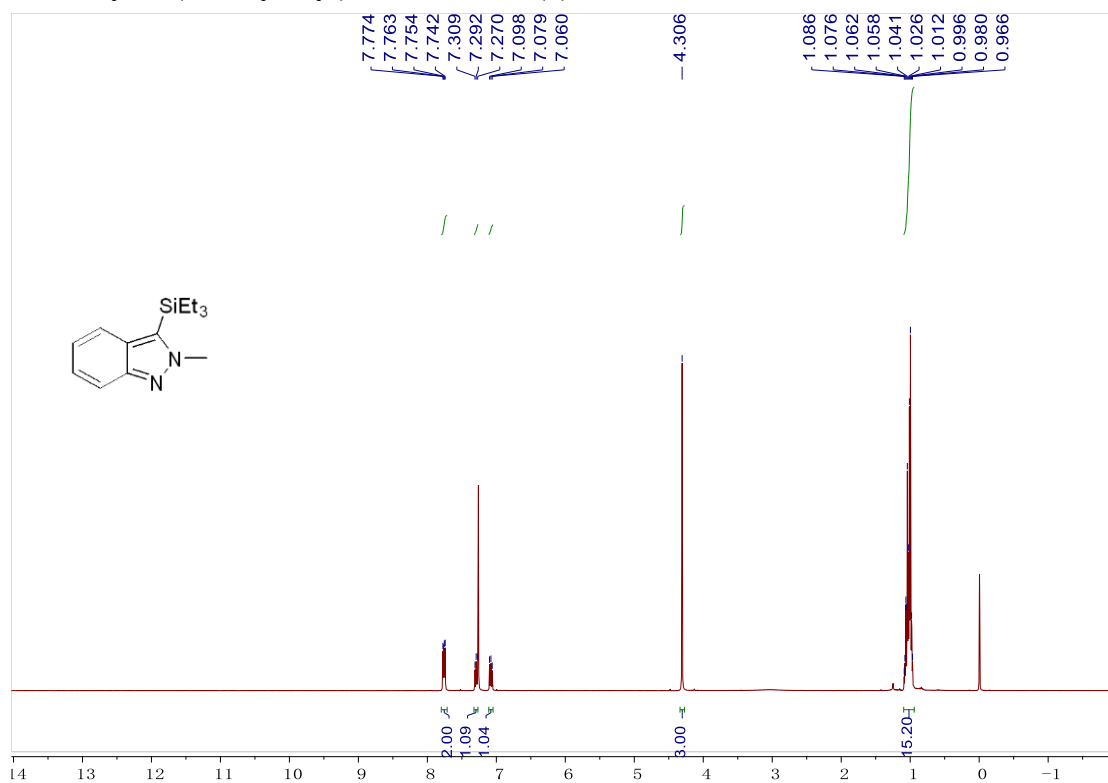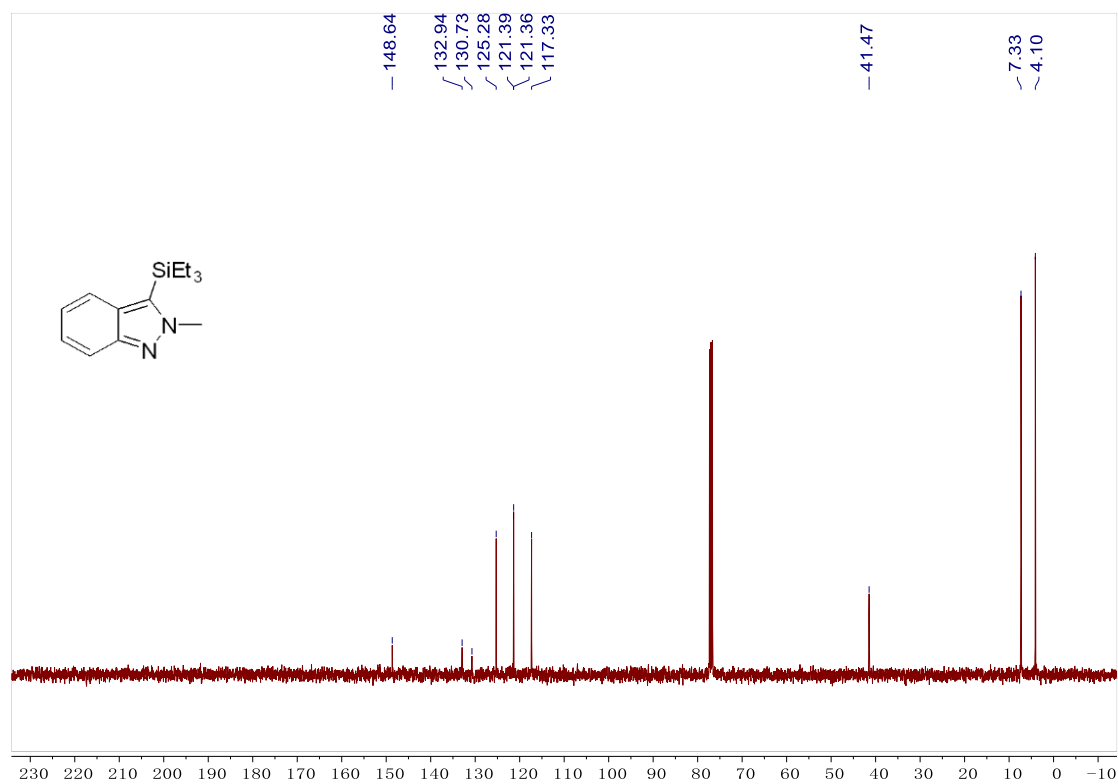

## 2-Methyl-4-phenyl-3-(triethylsilyl)-2H-indazole (2)

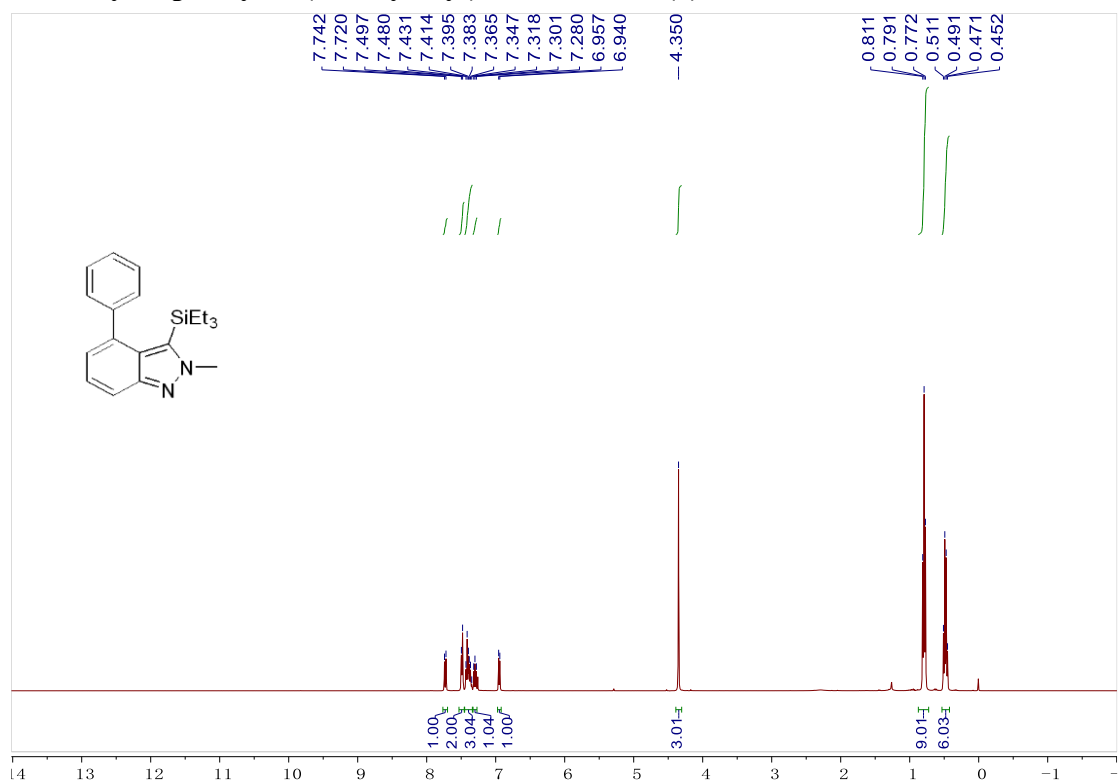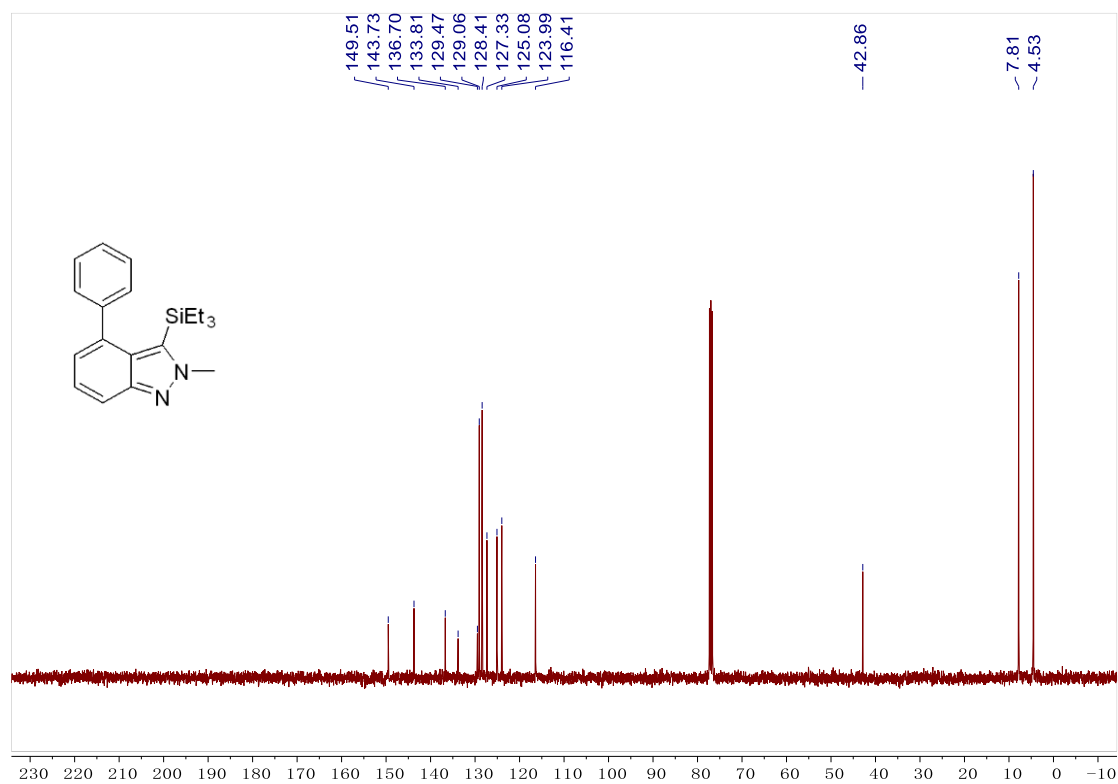

**4-(4-Isopropoxyphenyl)-2-methyl-3-(triethylsilyl)-2H-indazole (3)**

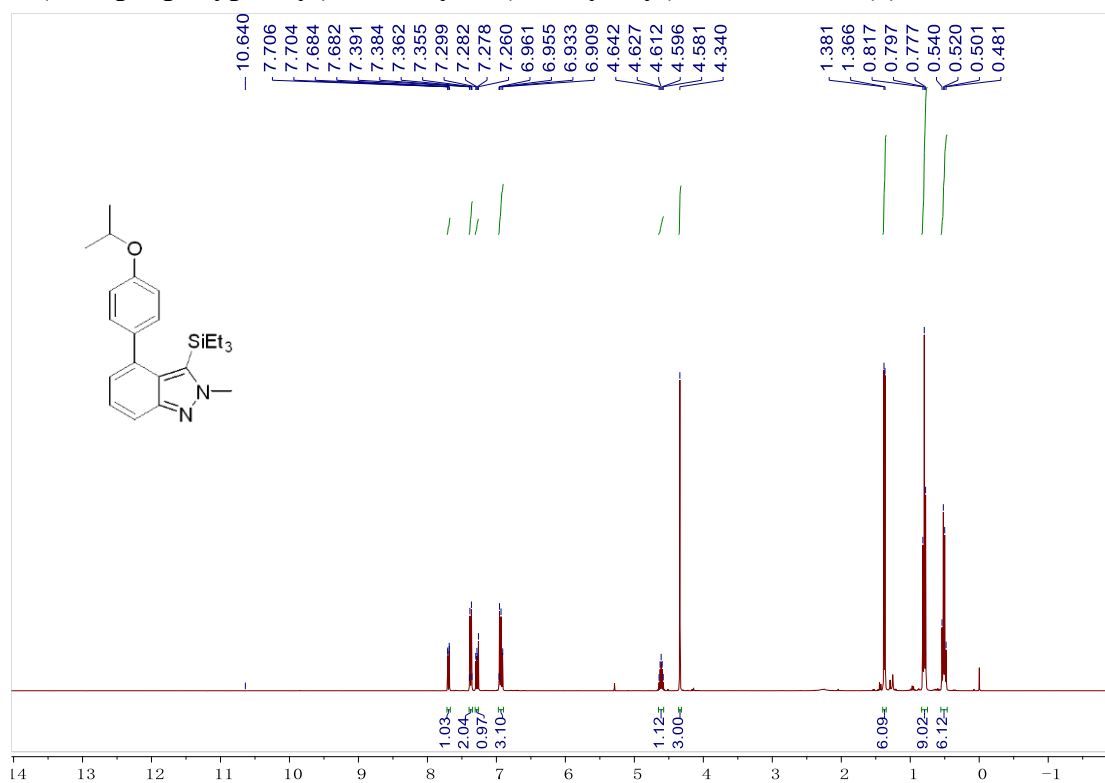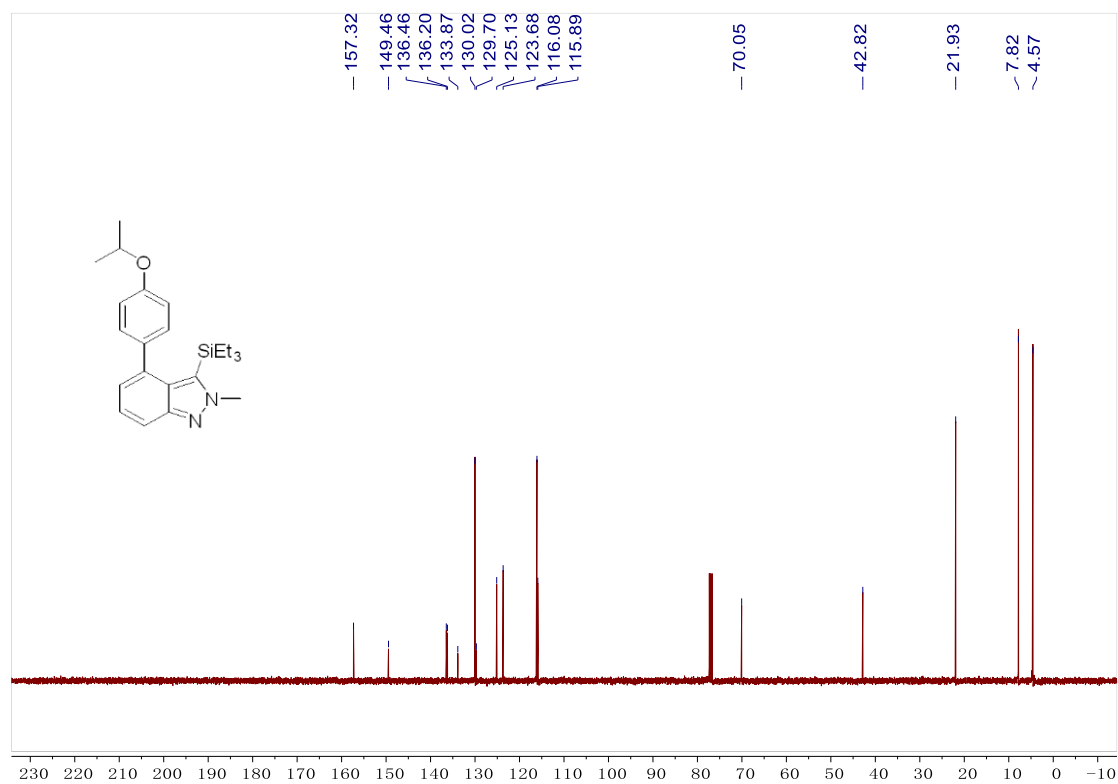

***N,N*-dimethyl-3-(2-methyl-3-(triethylsilyl)-2*H*-indazol-4-yl)aniline (4)**

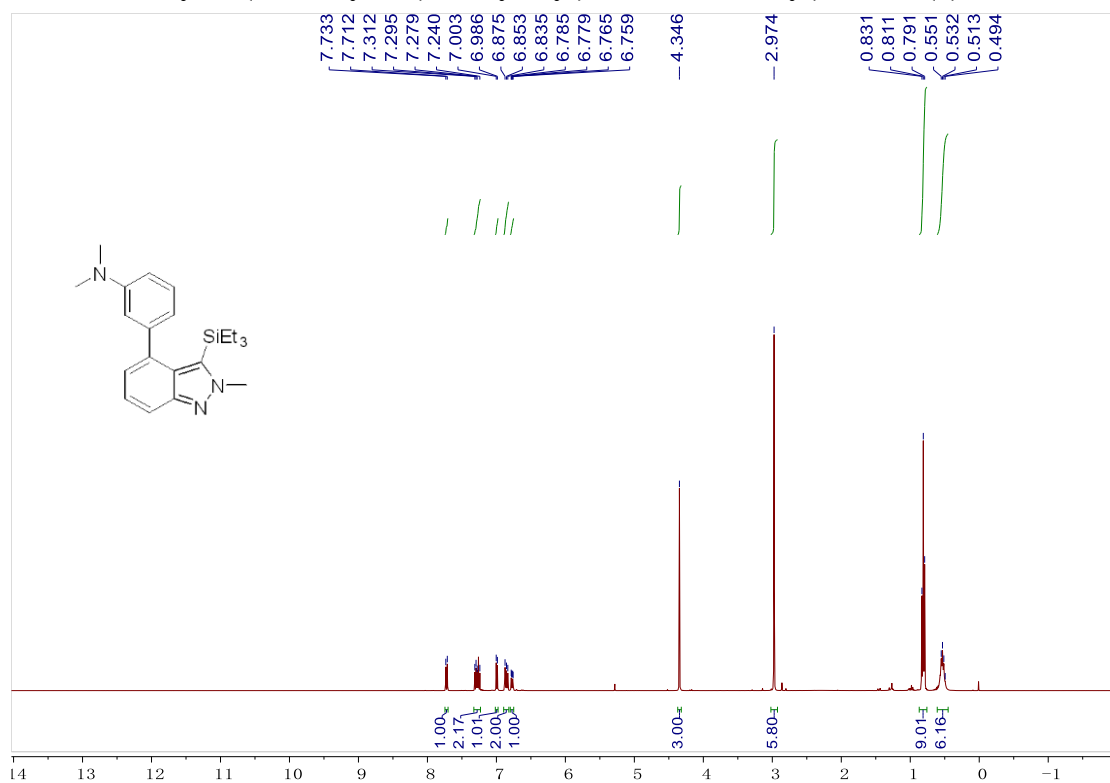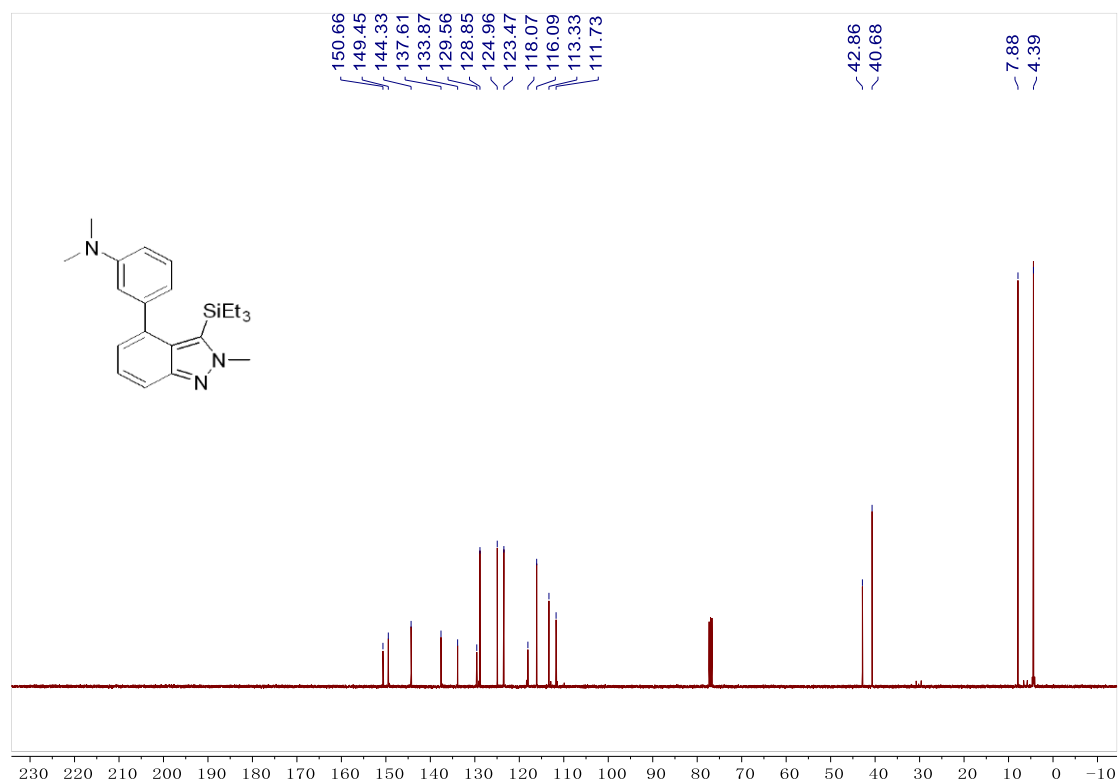

4-(4-(*Tert*-butyl)phenyl)-2-methyl-3-(triethylsilyl)-2*H*-indazole (5)

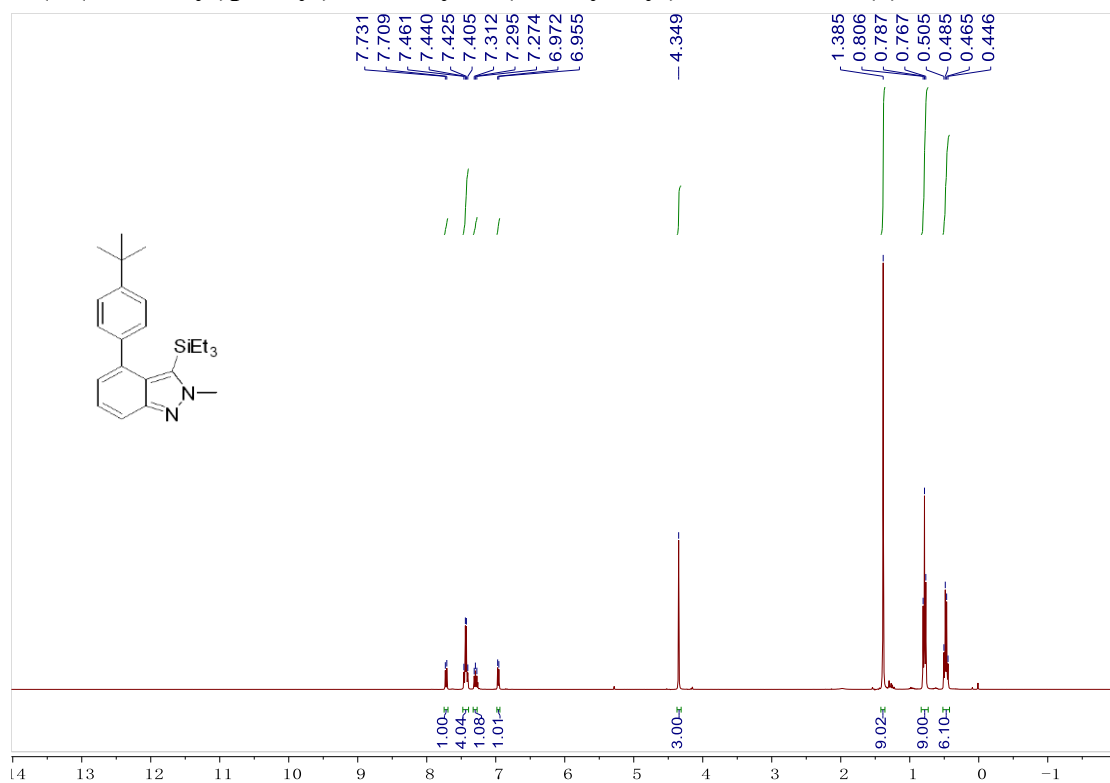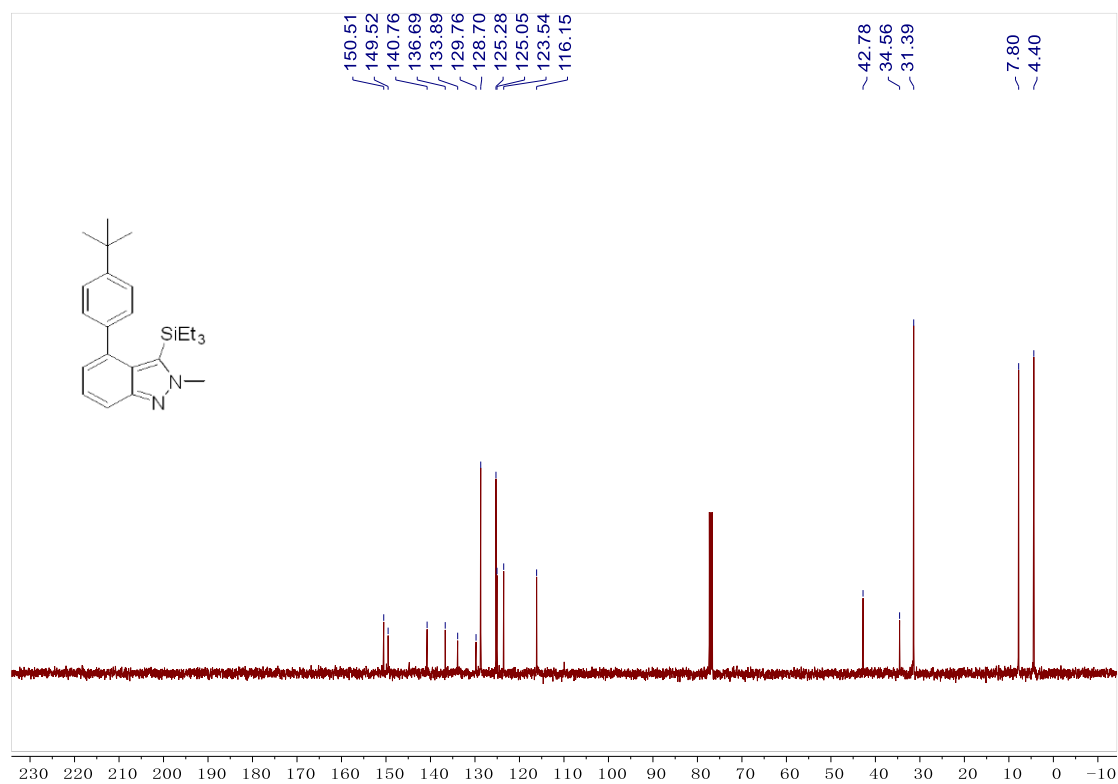



4-(Benzo[d][1,3]dioxol-5-yl)-2-methyl-3-(triethylsilyl)-2H-indazole (6)

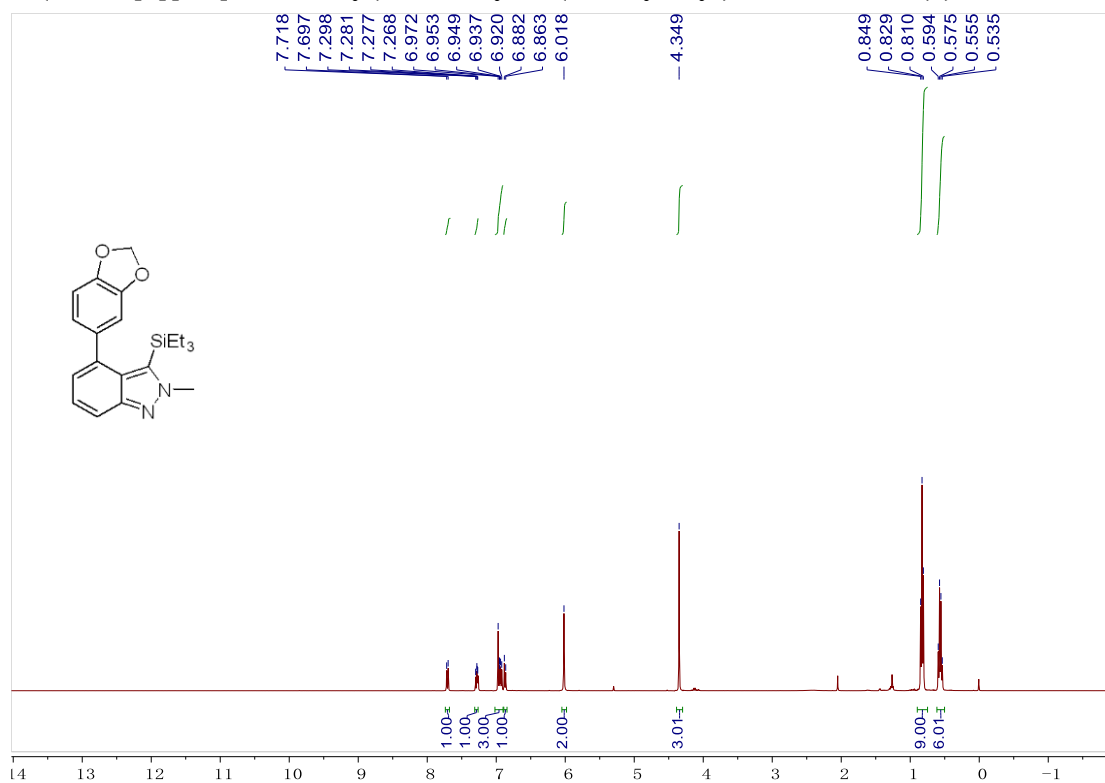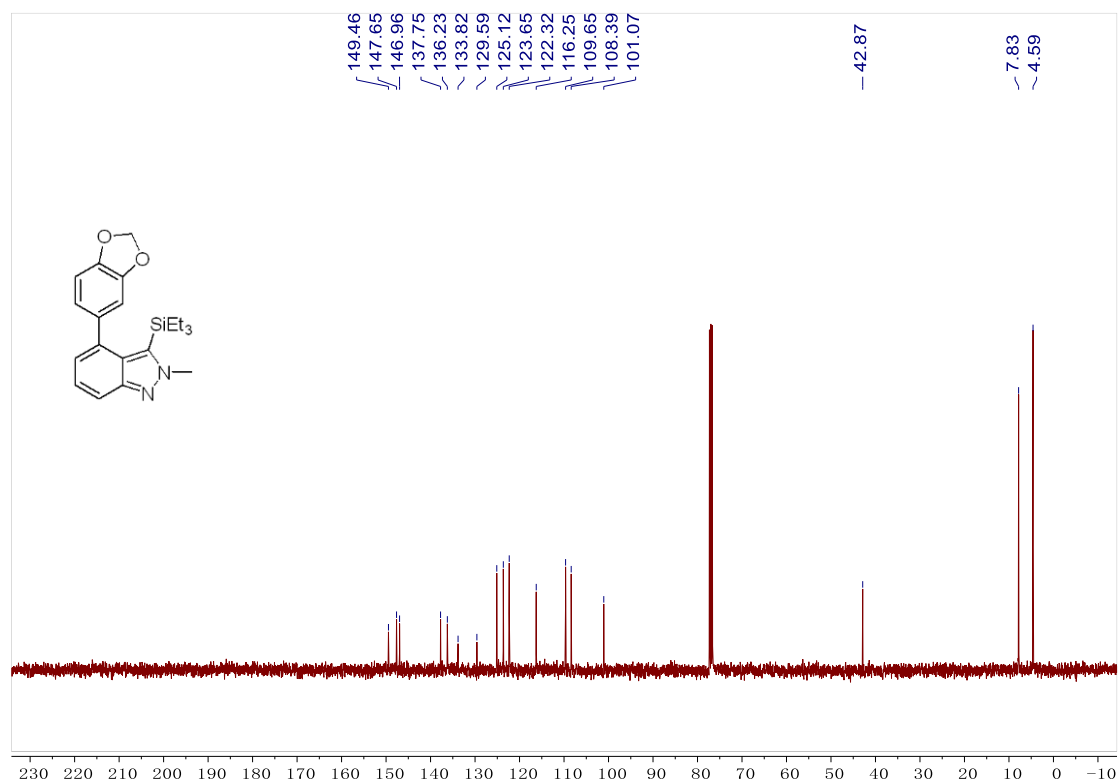

### 2,5-Dimethyl-3-(triethylsilyl)-2*H*-indazole (7)

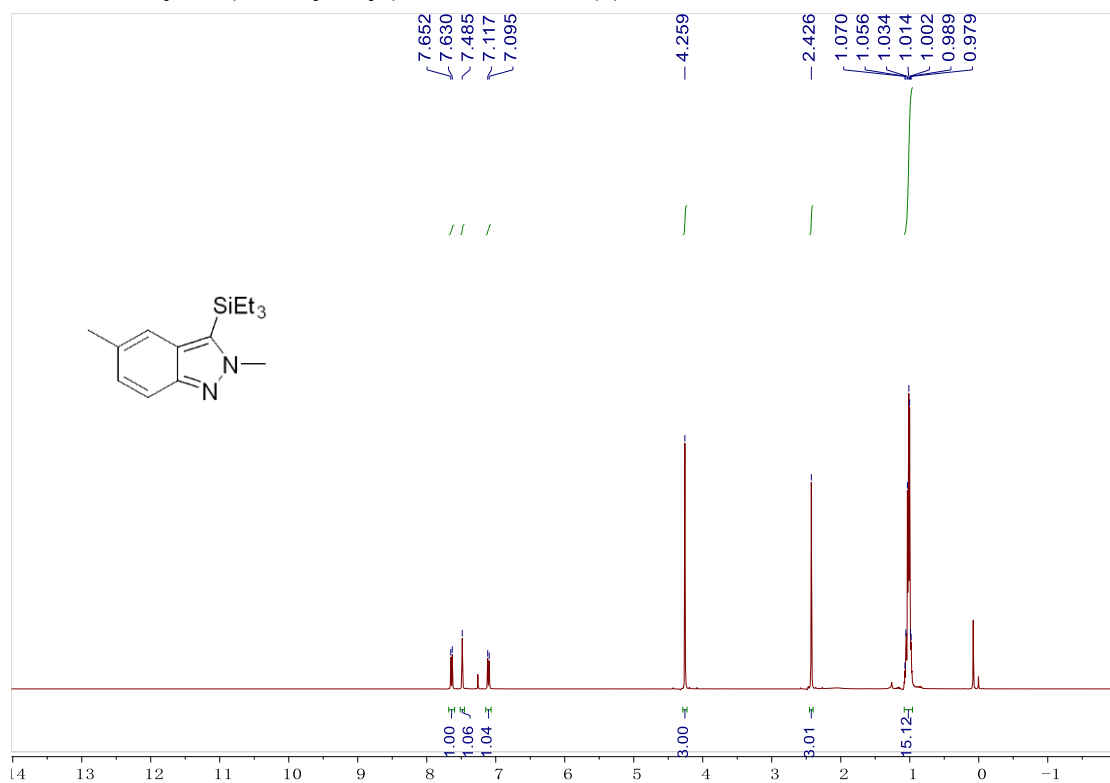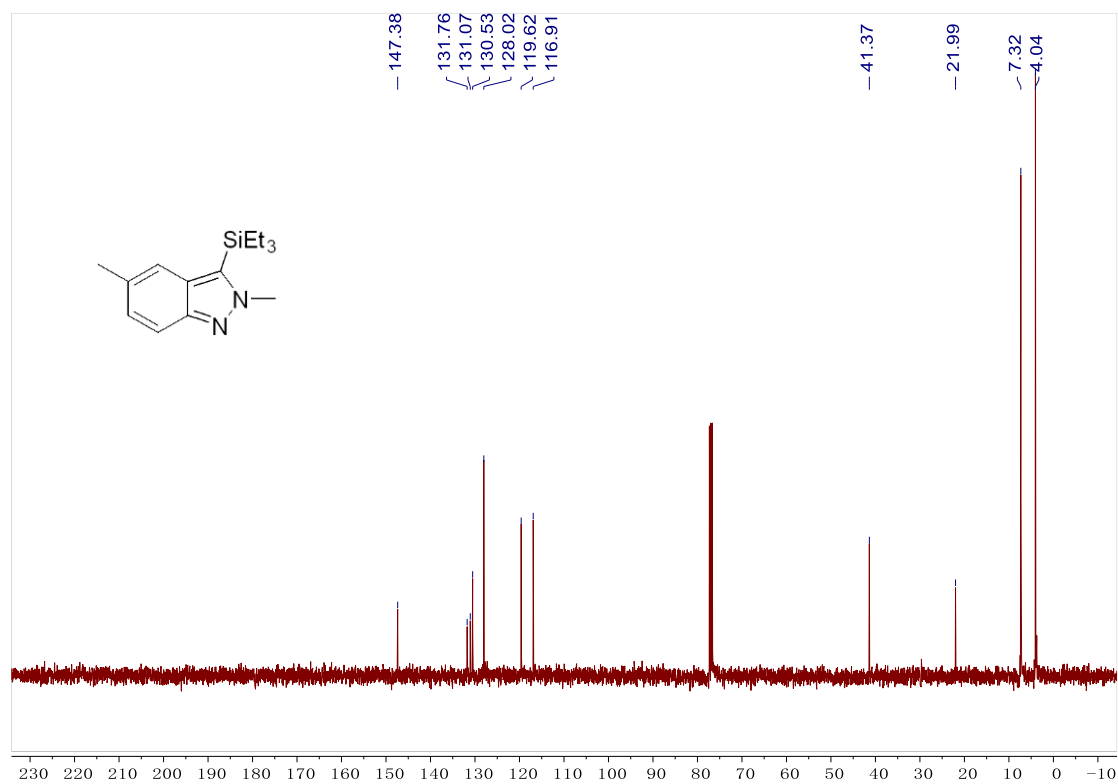

### 5-Methoxy-2-methyl-3-(triethylsilyl)-2H-indazole (8)

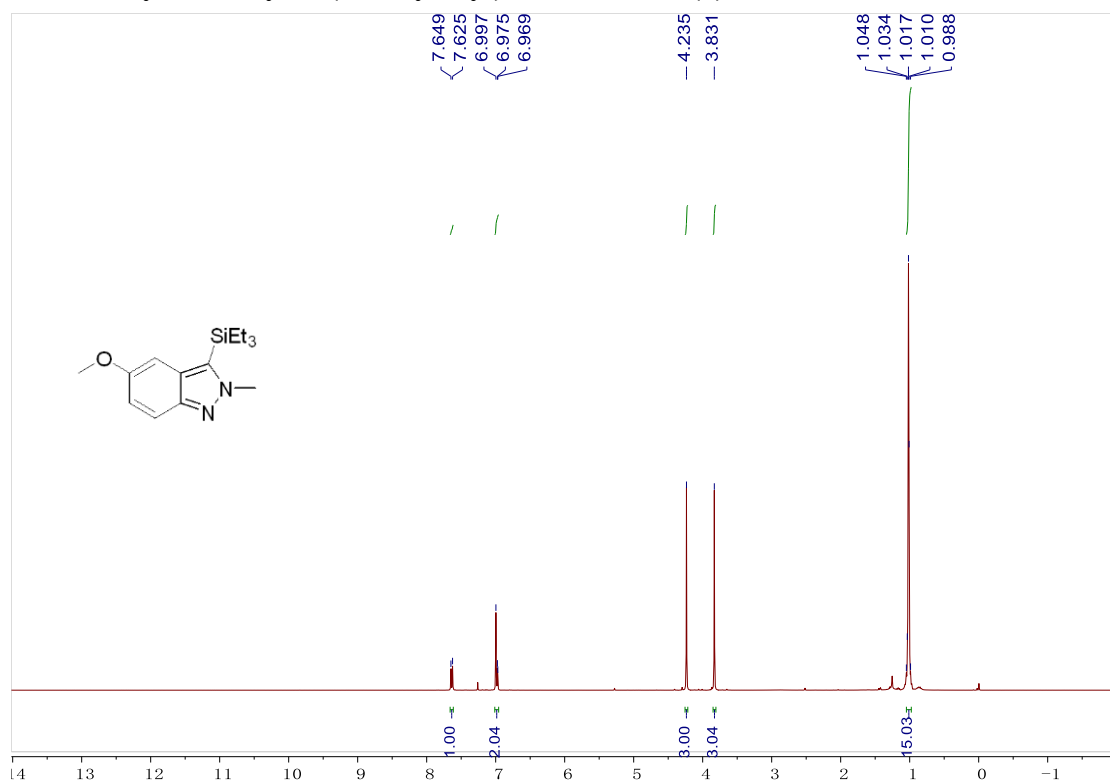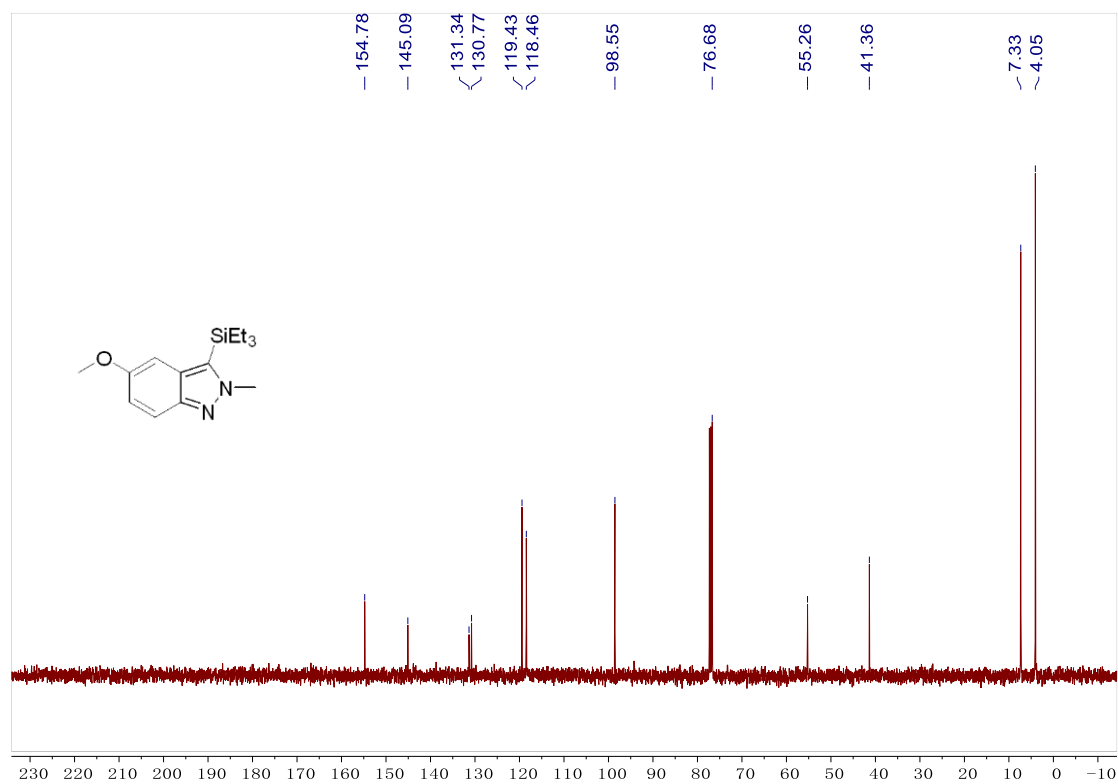

## 2-Methyl-5-phenyl-3-(triethylsilyl)-2H-indazole (9)

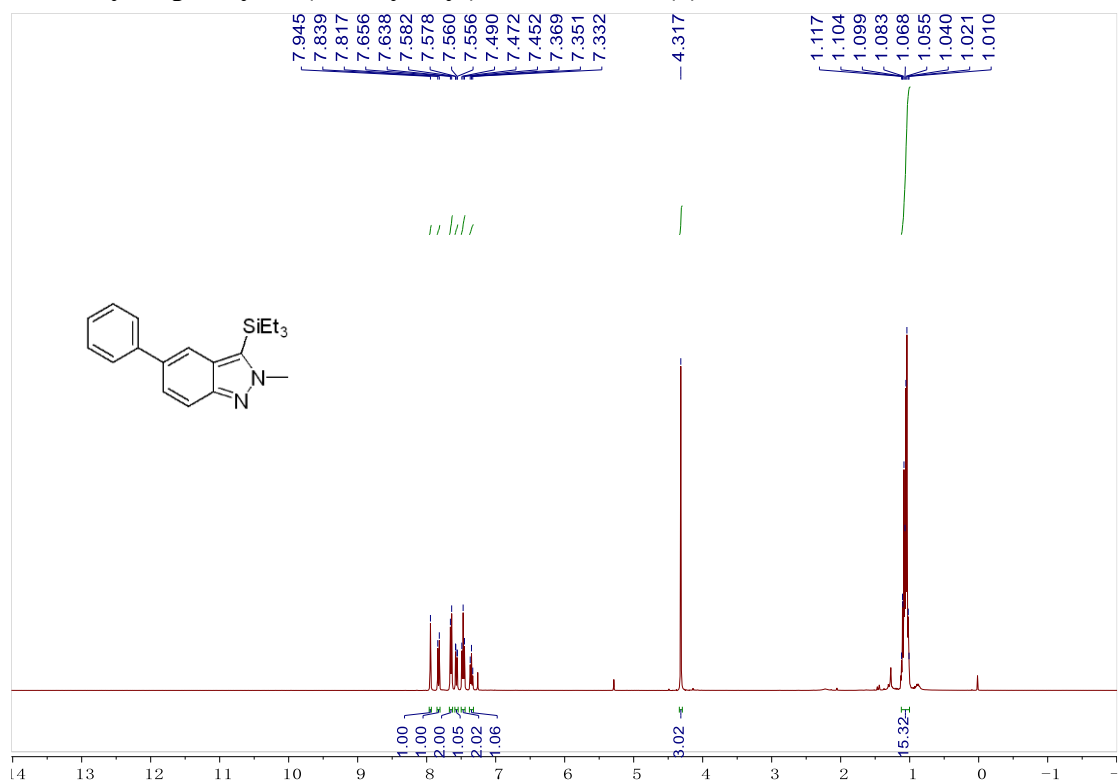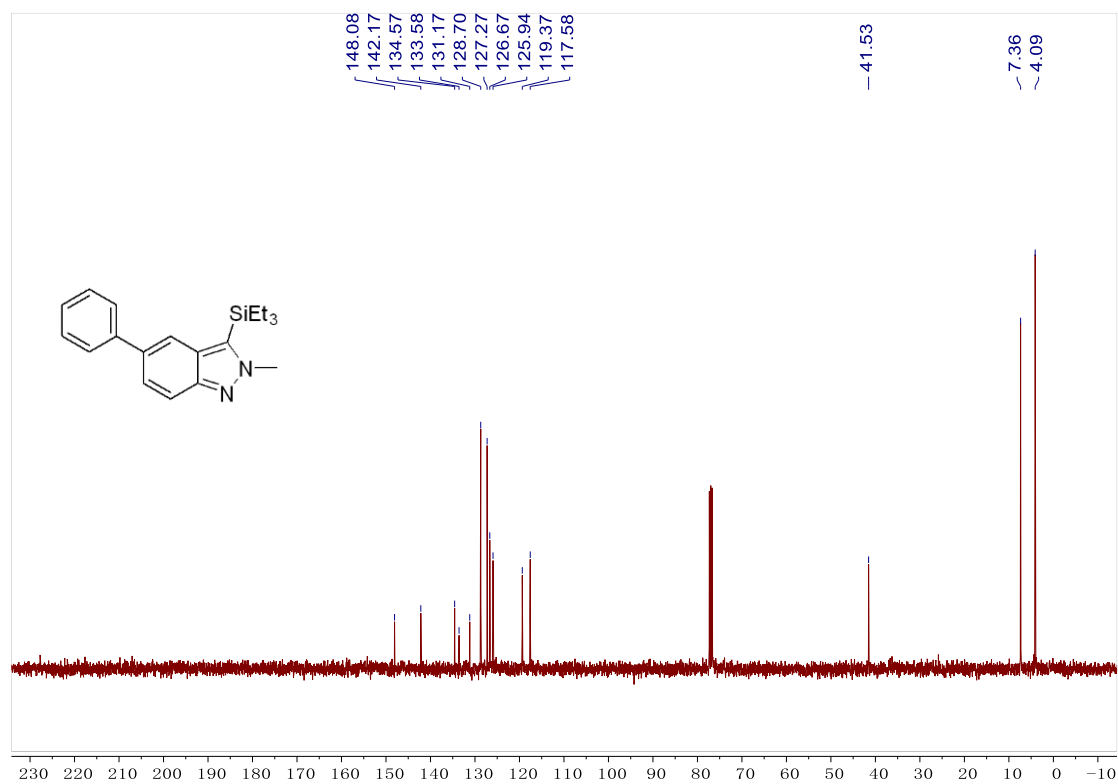

## 2-Methyl-5-(*p*-tolyl)-3-(triethylsilyl)-2*H*-indazole (10)

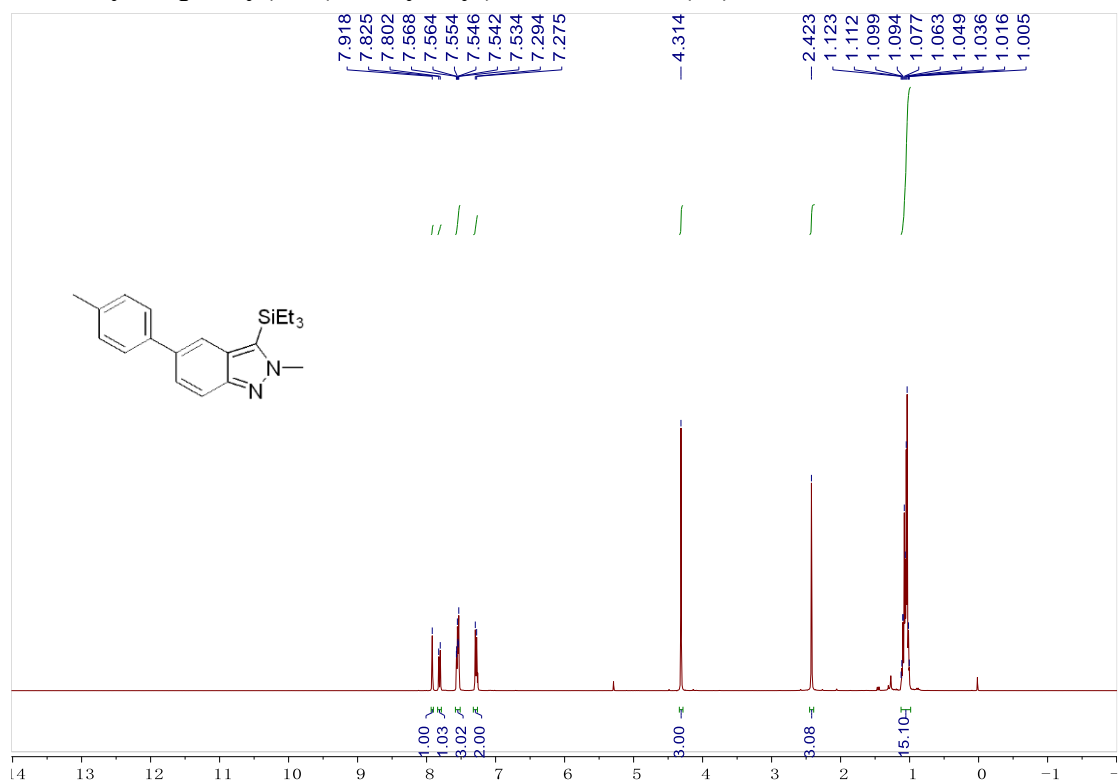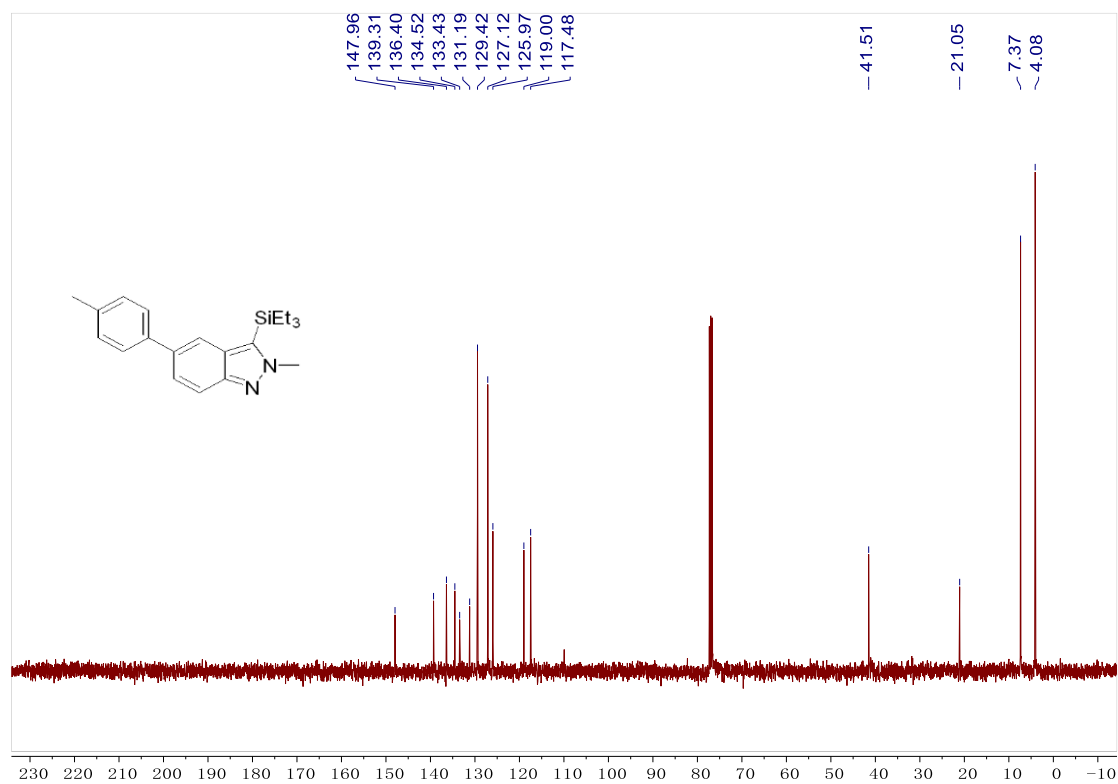

### 2-Methyl-5-(4-(methylthio)phenyl)-3-(triethylsilyl)-2H-indazole (11)

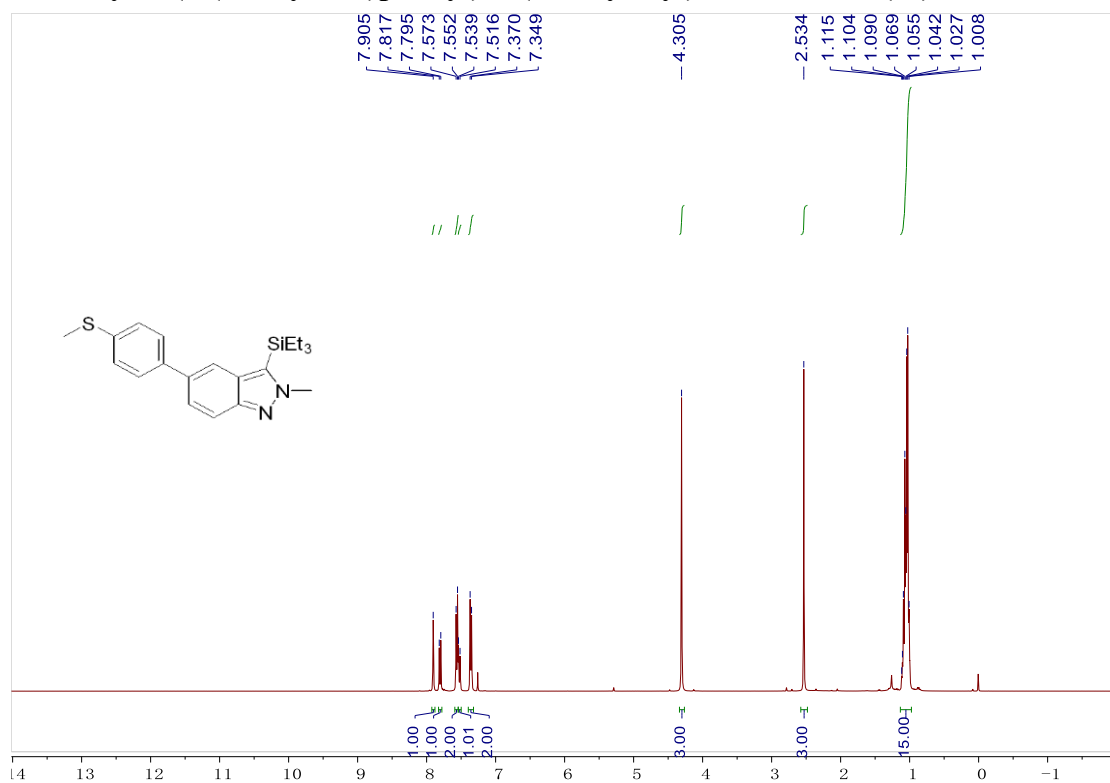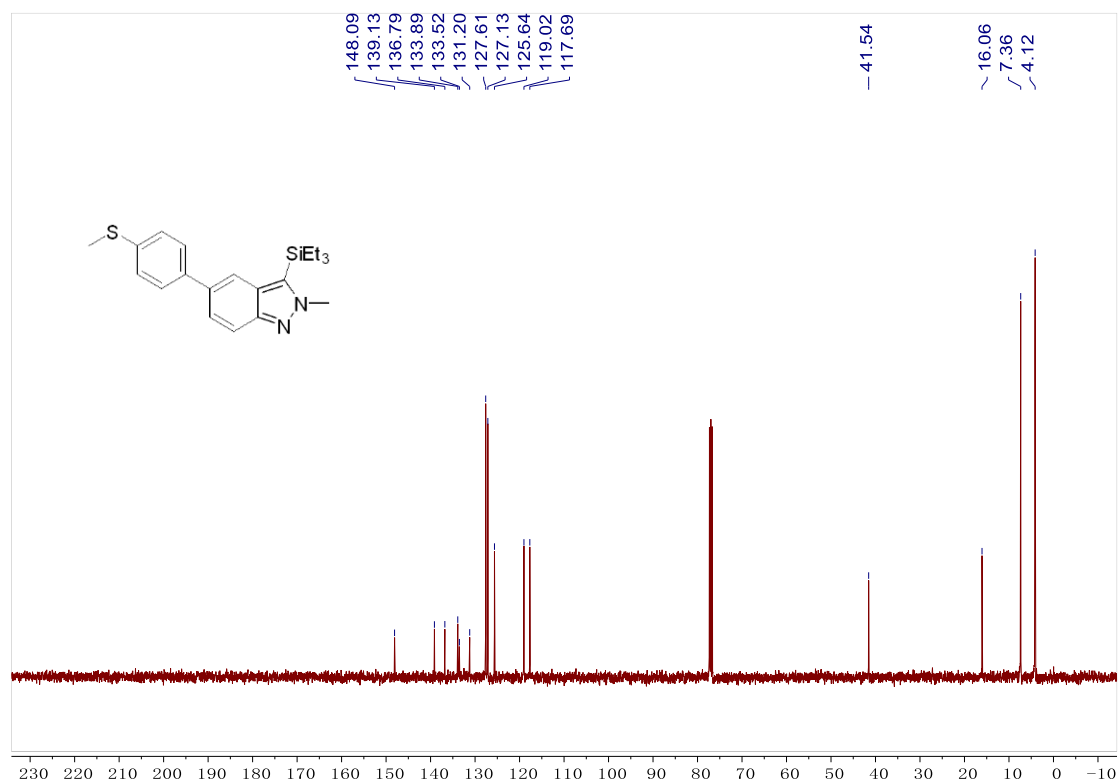

### 5-(4-Fluorophenyl)-2-methyl-3-(triethylsilyl)-2H-indazole (12)

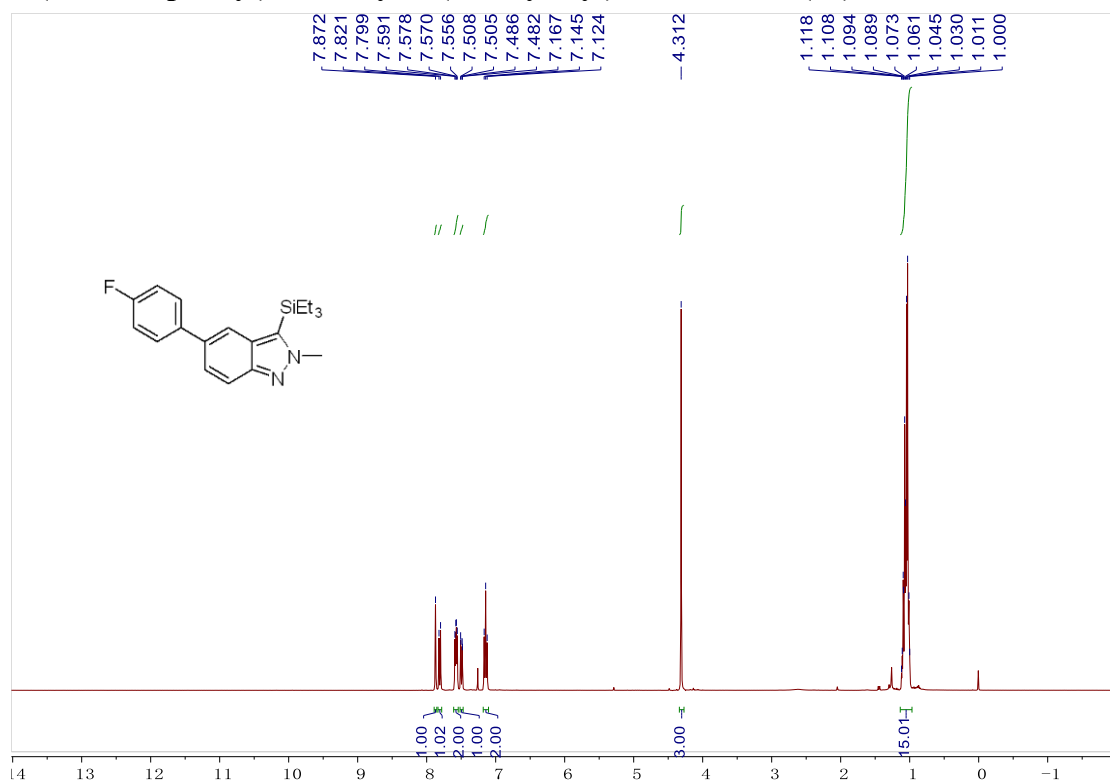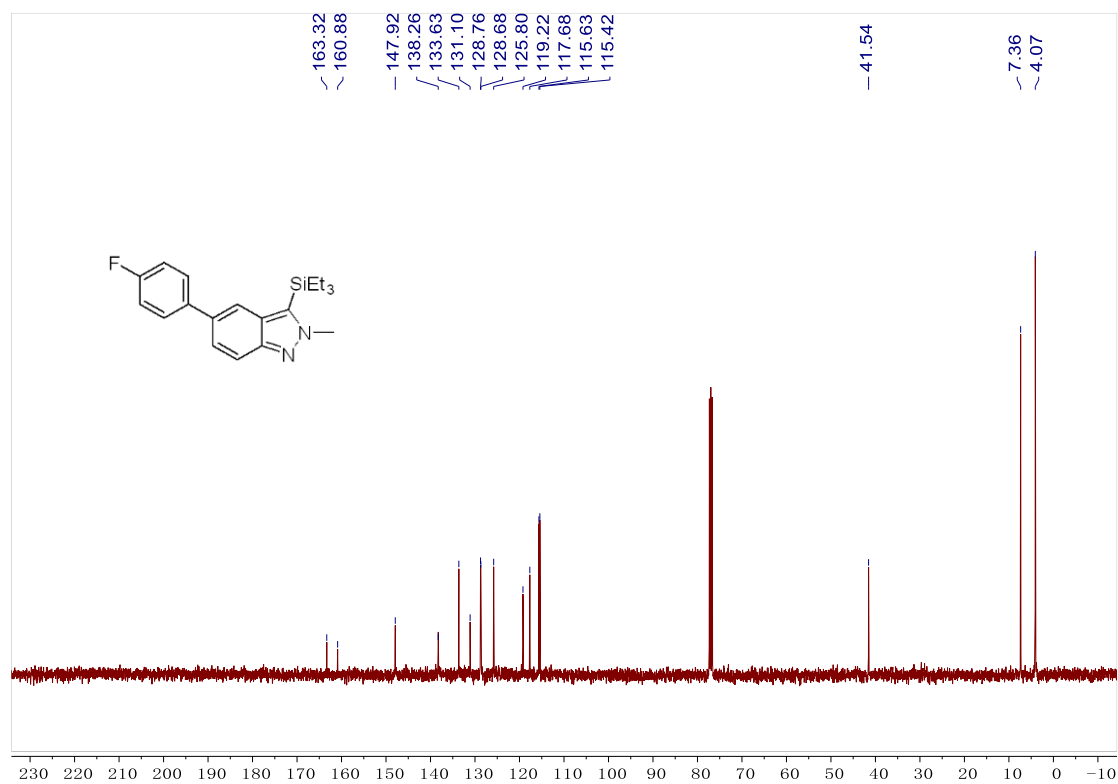

### 2-Methyl-3-(triethylsilyl)-5-(4-(trifluoromethyl)phenyl)-2H-indazole (13)

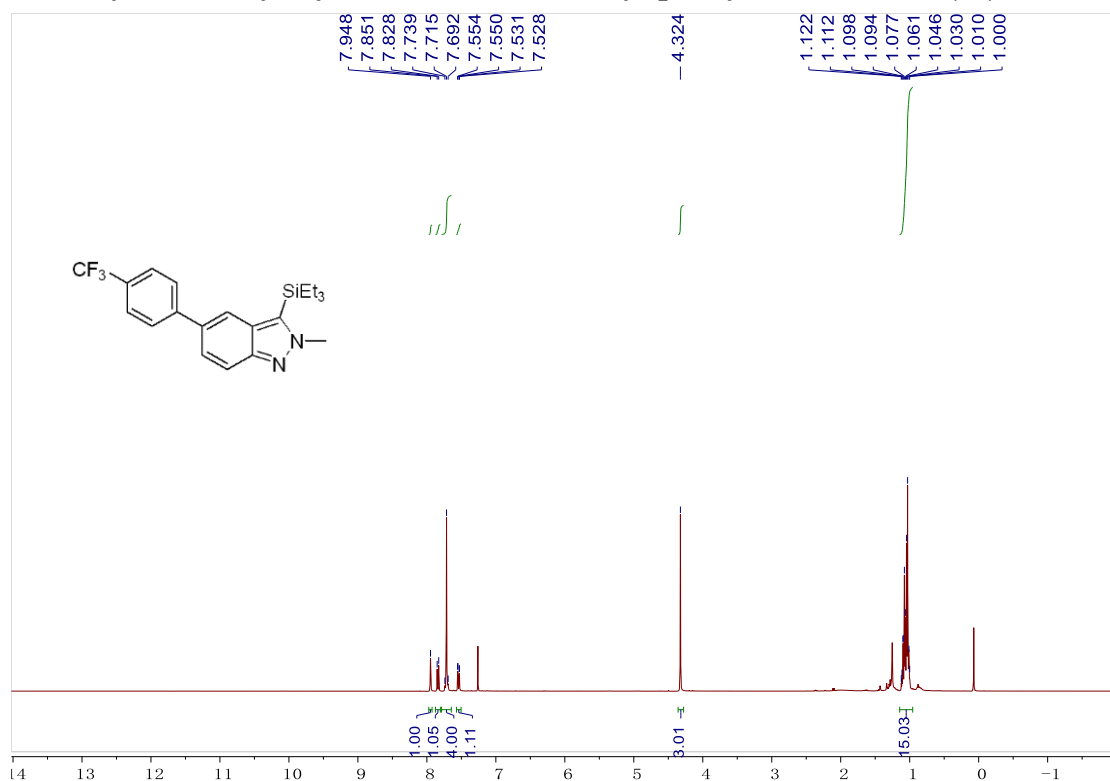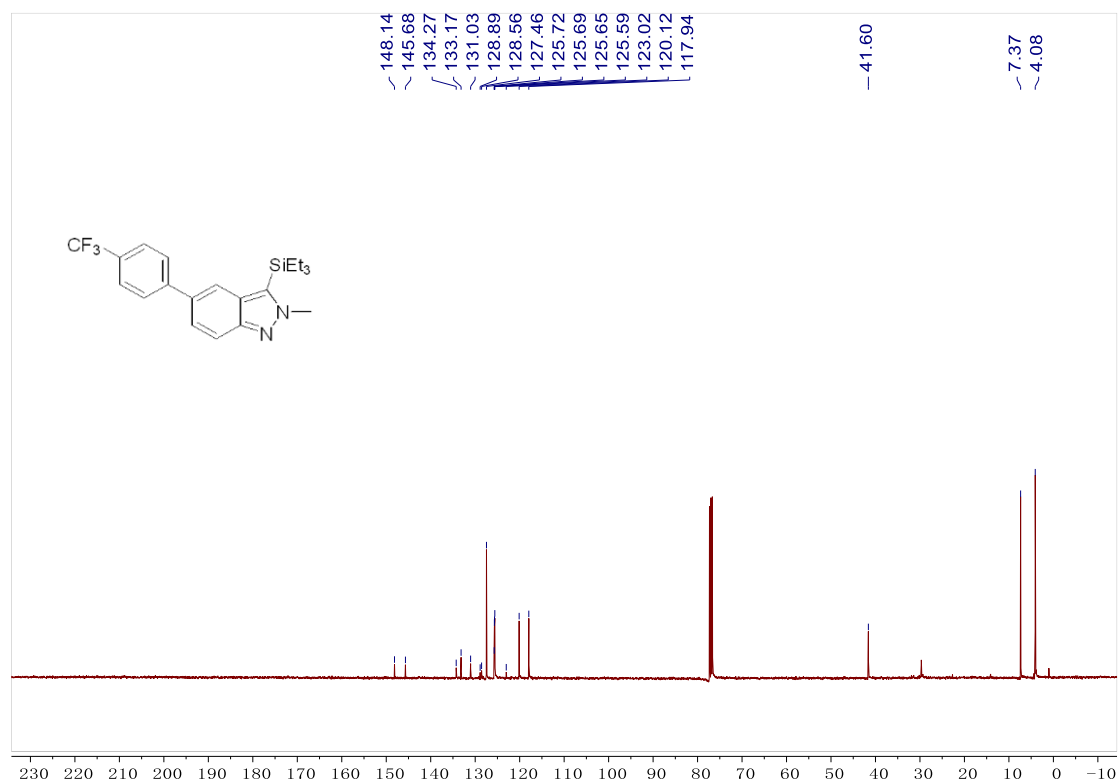



**5-(2,3-Dihydrobenzo[*b*][1,4]dioxin-6-yl)-2-methyl-3-(triethylsilyl)-2*H*-indazole**  
**(14)**

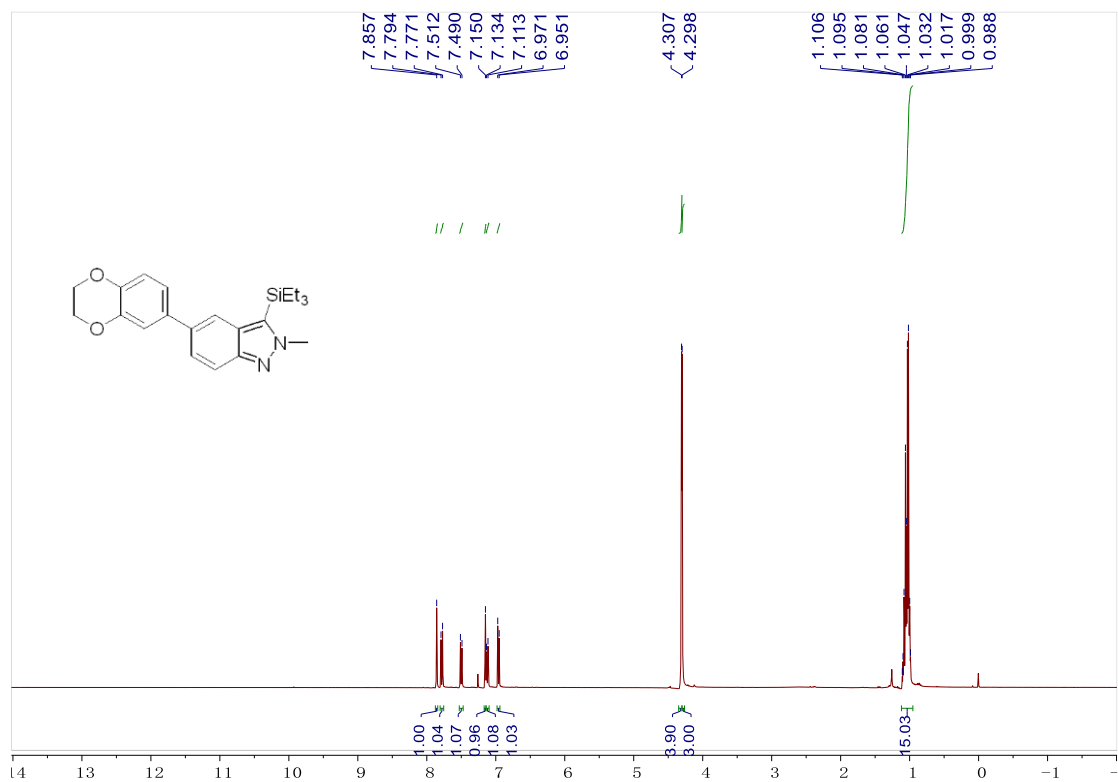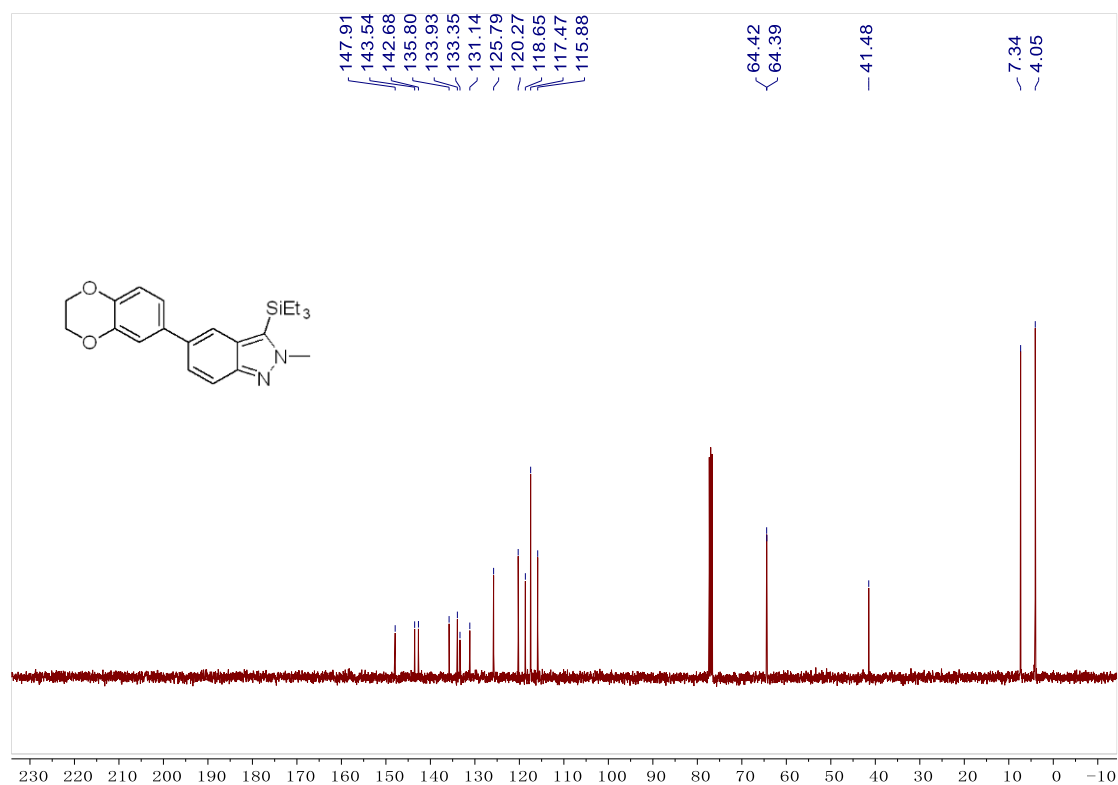

**4-(2-Methyl-3-(triethylsilyl)-2H-indazol-5-yl)-N,N-diphenylaniline (15)**

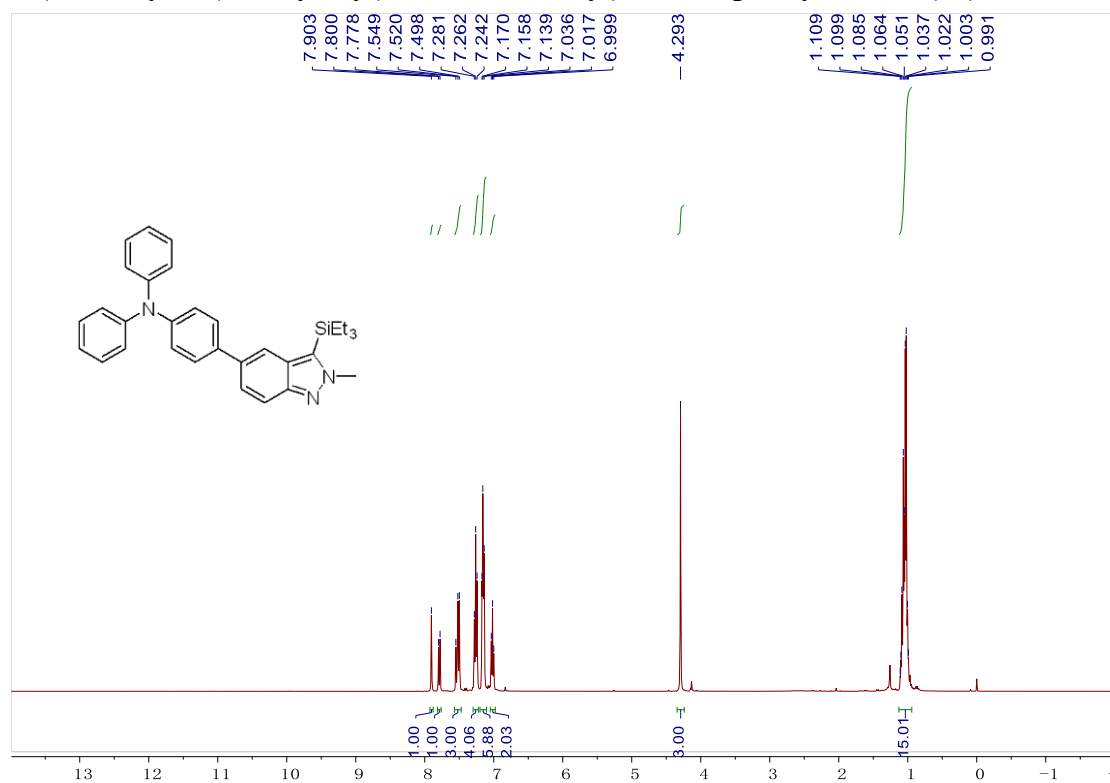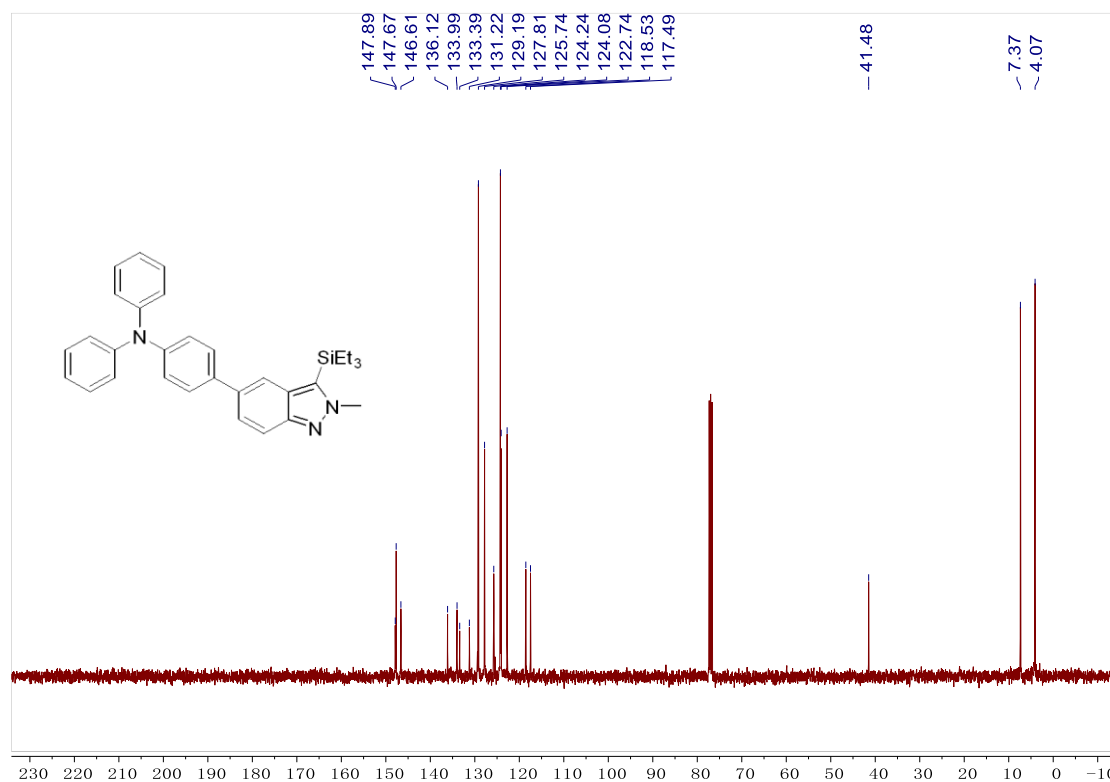

## 2-Methyl-5-(naphthalen-2-yl)-3-(triethylsilyl)-2H-indazole (16)

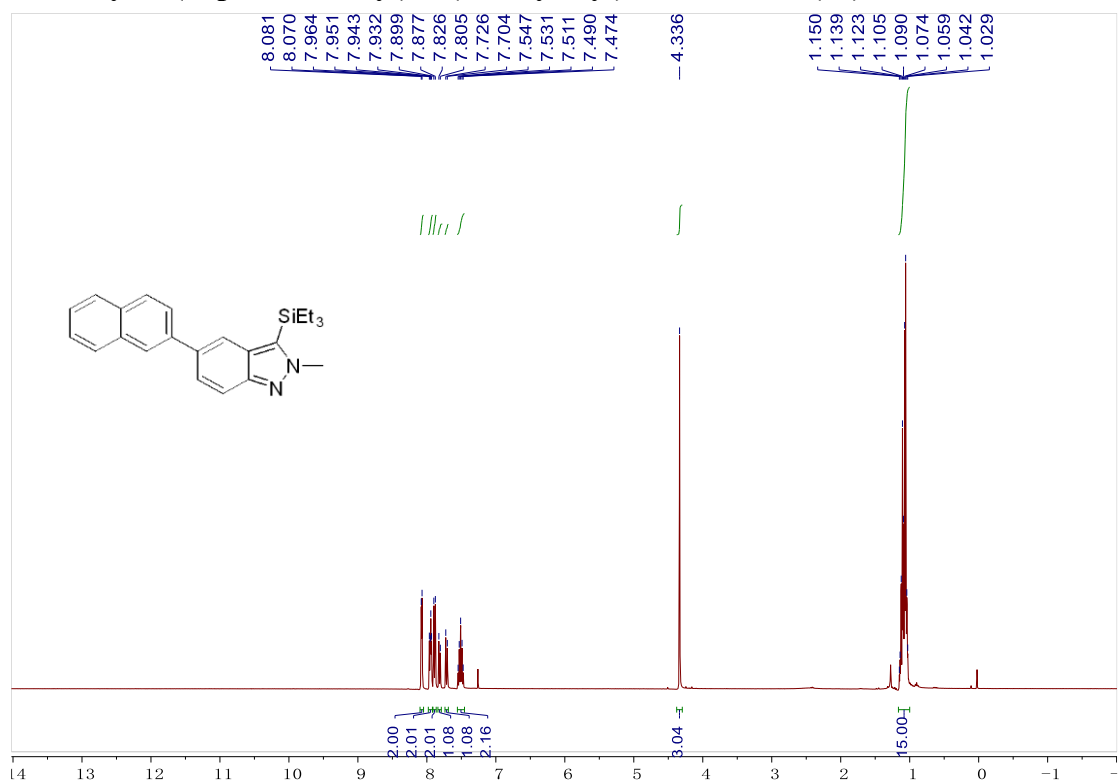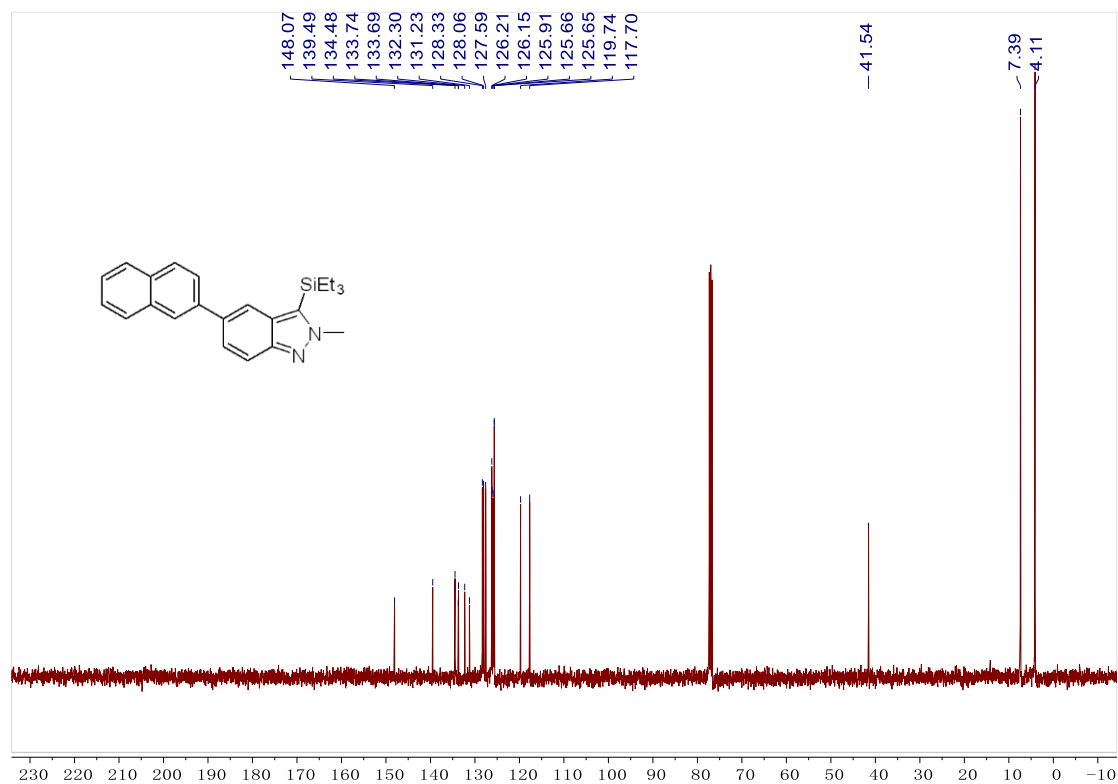

### 2-Methyl-5-(phenanthren-9-yl)-3-(triethylsilyl)-2H-indazole (17)

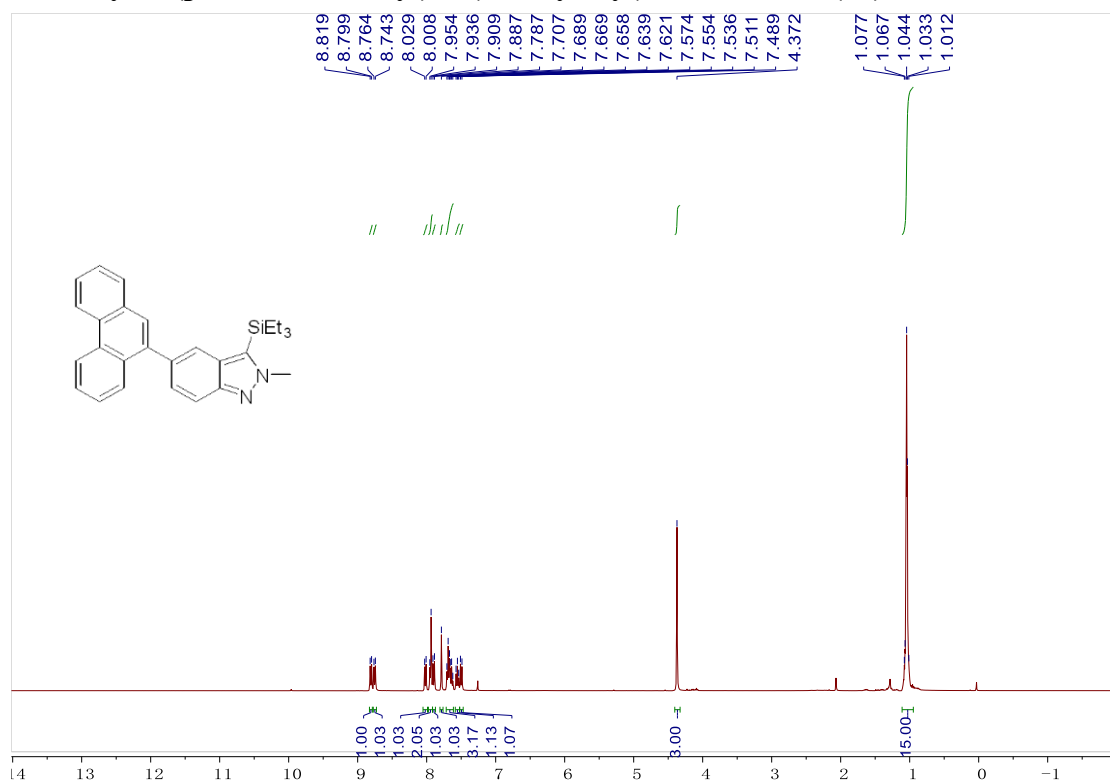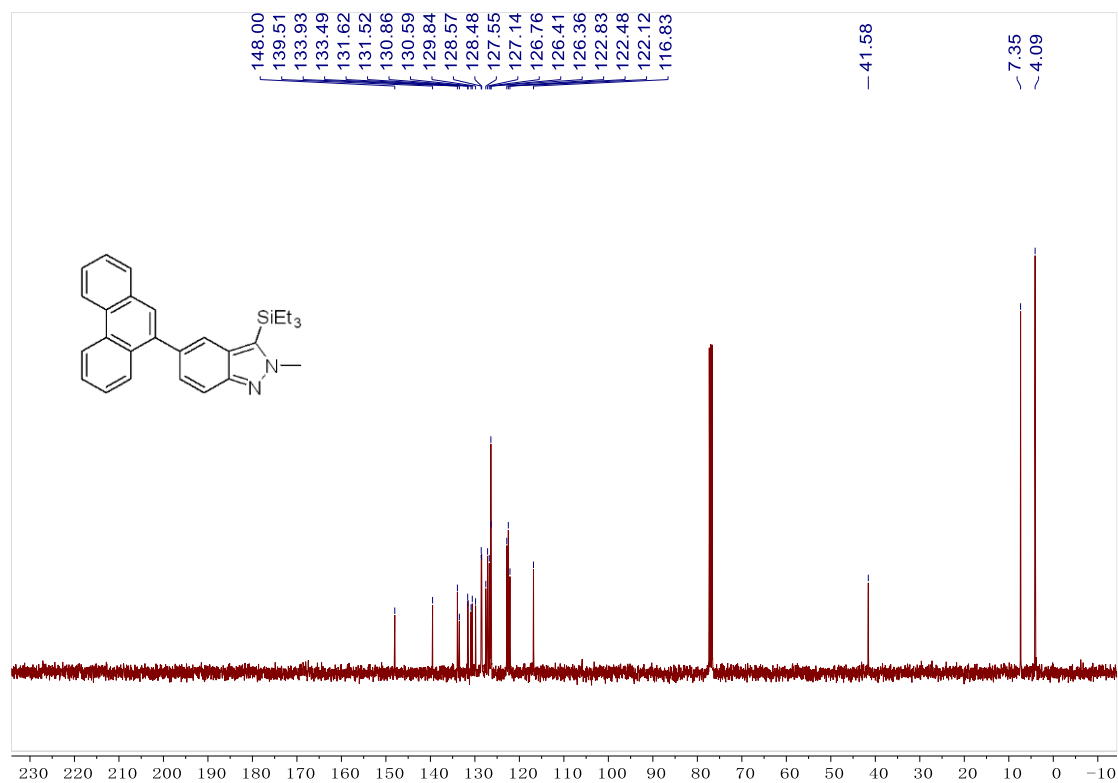

### 2-Methyl-5-(thiophen-2-yl)-3-(triethylsilyl)-2H-indazole (18)

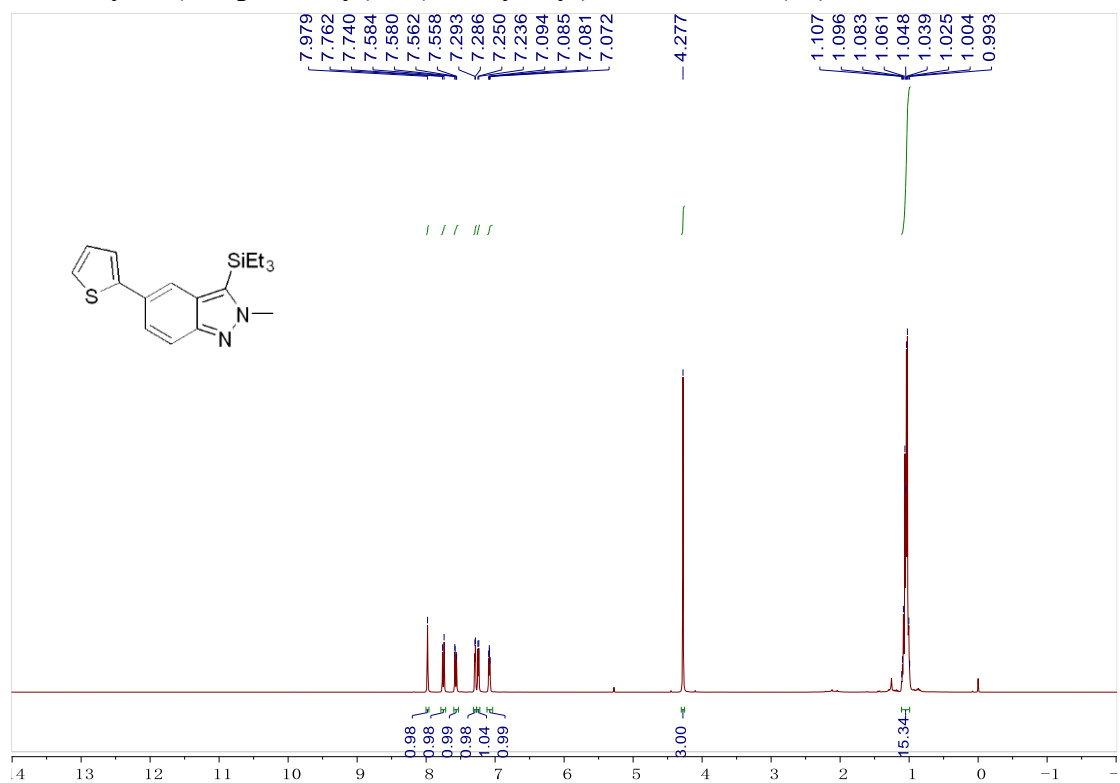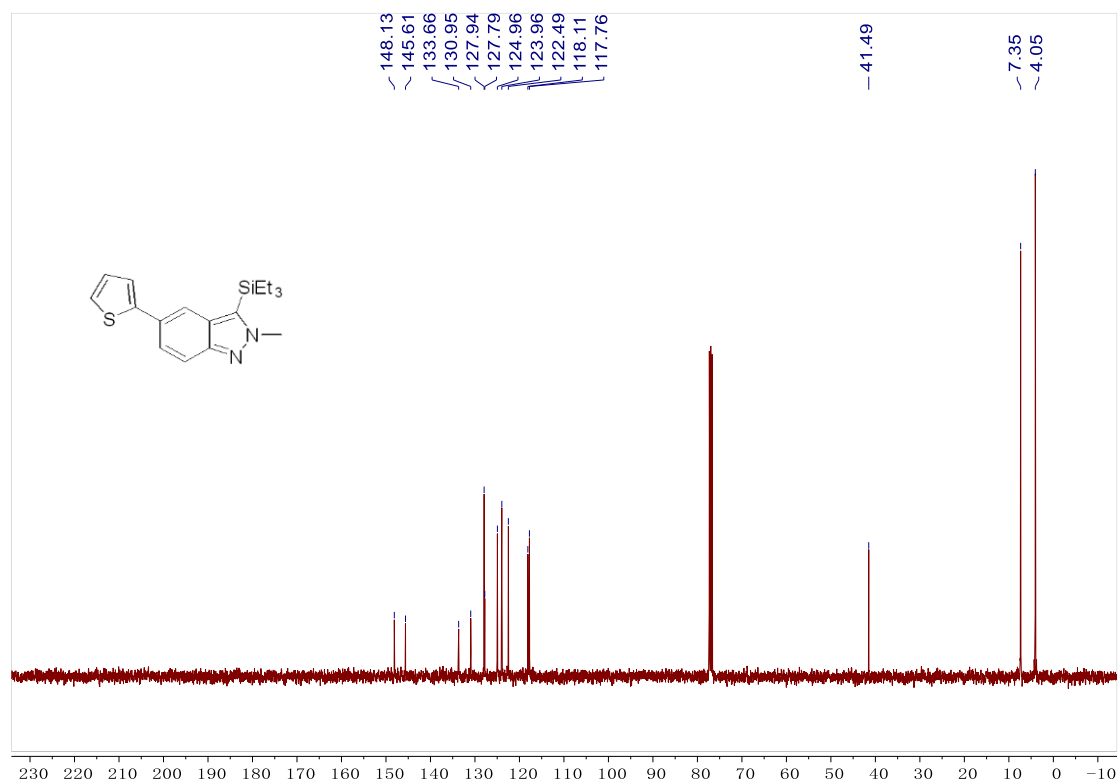

## 2-Methyl-5-(pyridin-3-yl)-3-(triethylsilyl)-2H-indazole (19)

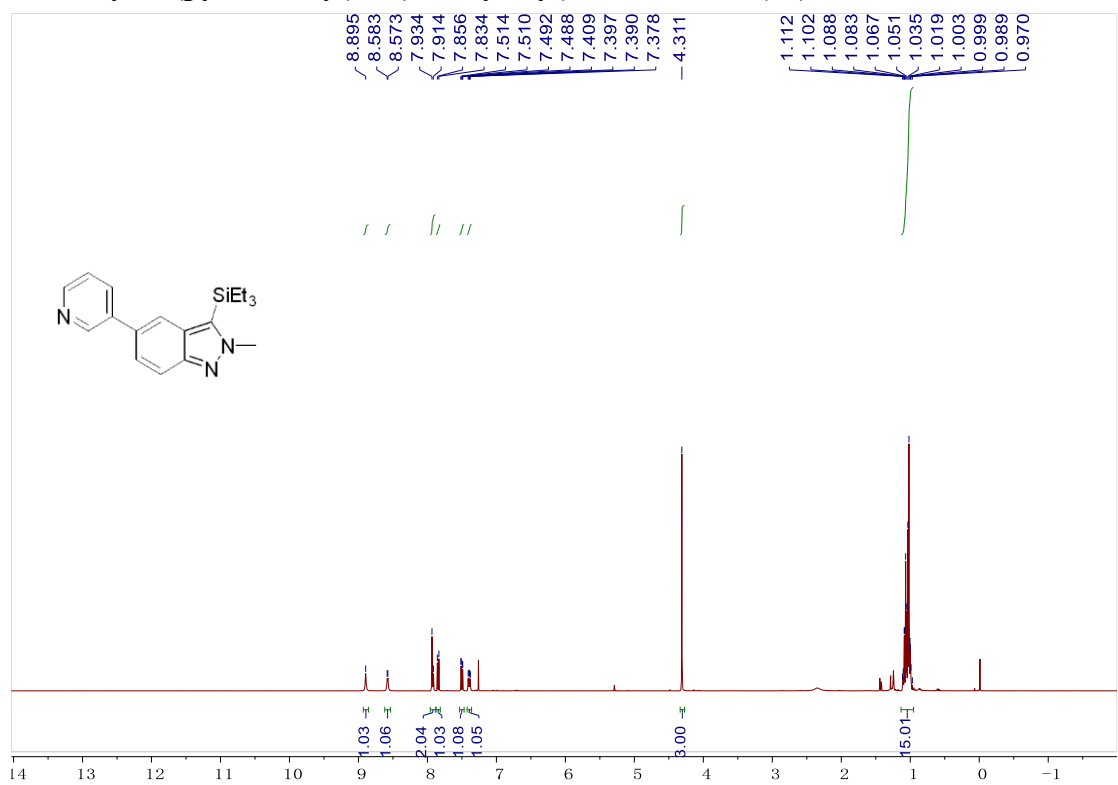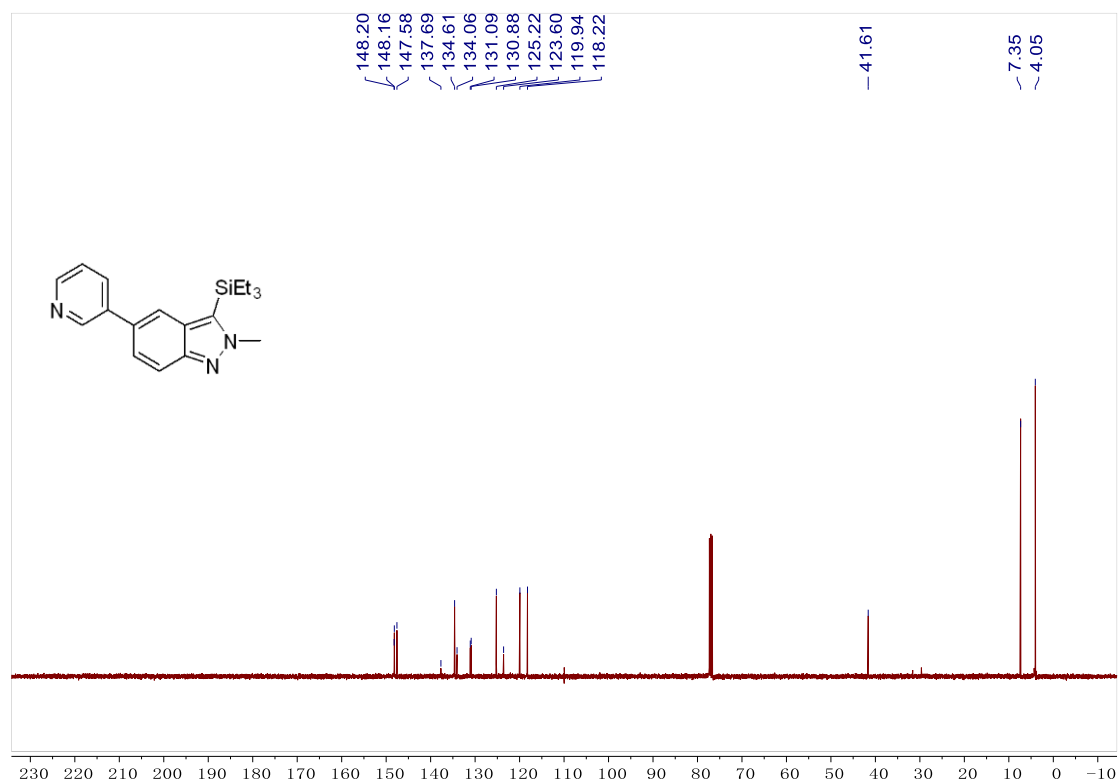

**2-Methyl-5-(4,4,5,5-tetramethyl-1,3,2-dioxaborolan-2-yl)-3-(triethylsilyl)-2H-indazole (20)**

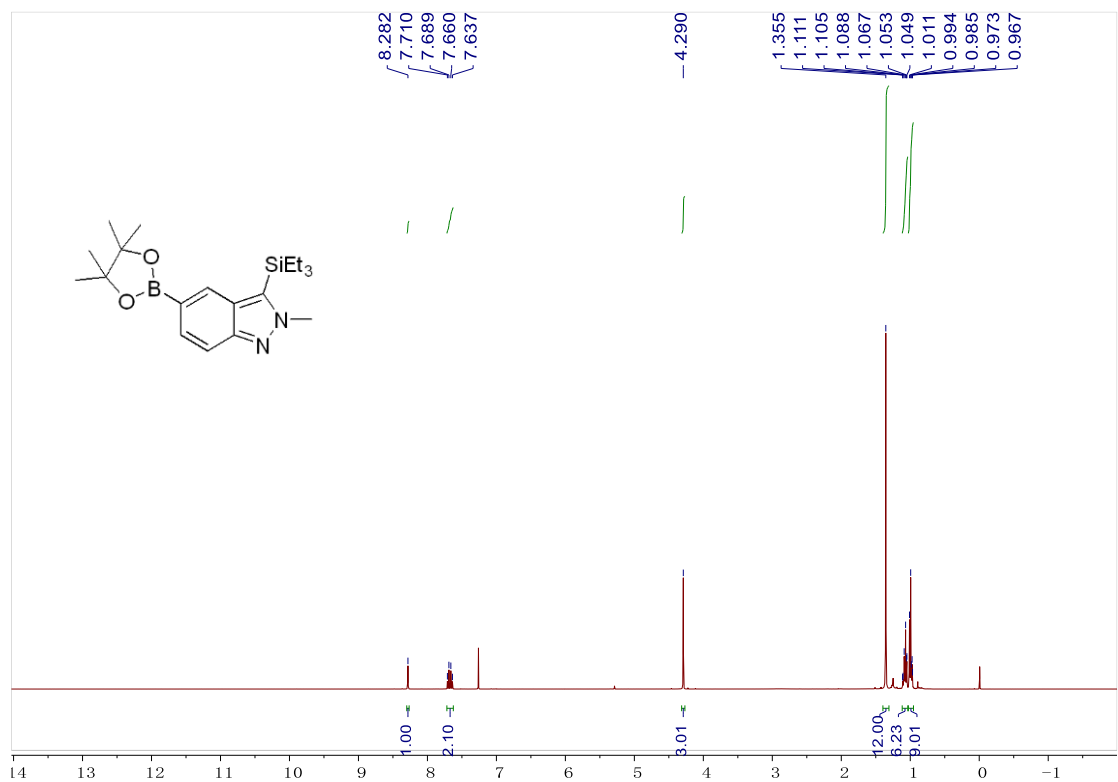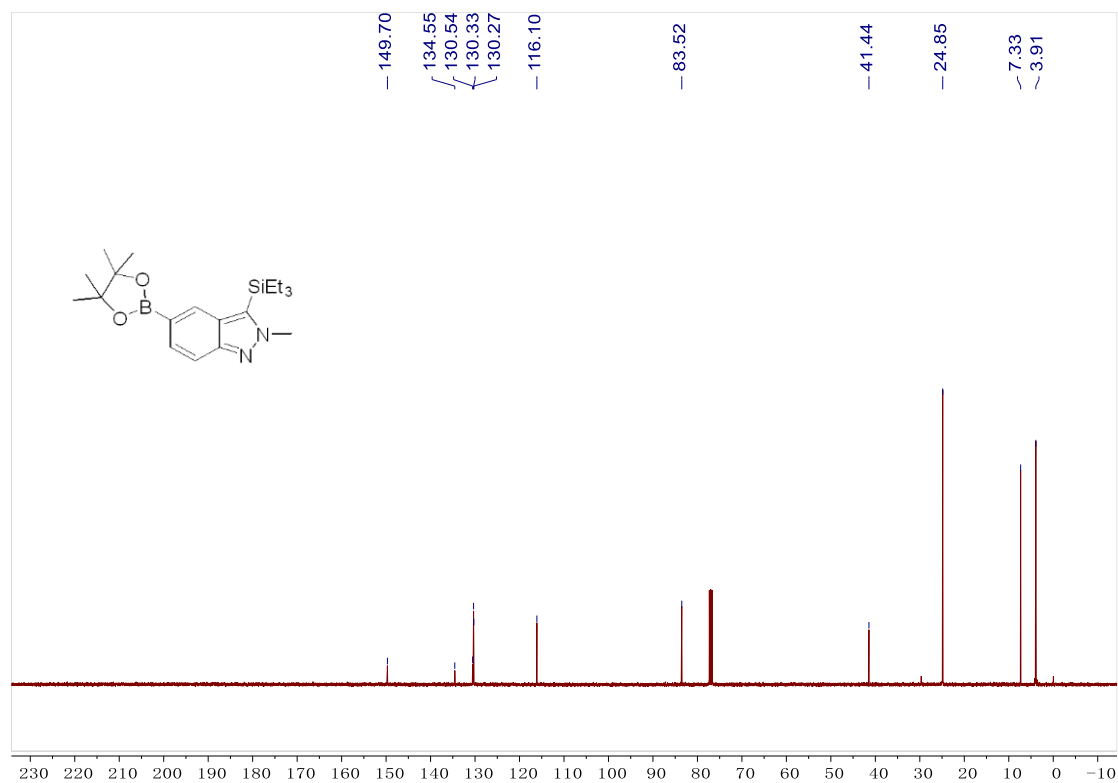

### 5-Chloro-2-methyl-3-(triethylsilyl)-2H-indazole (21)

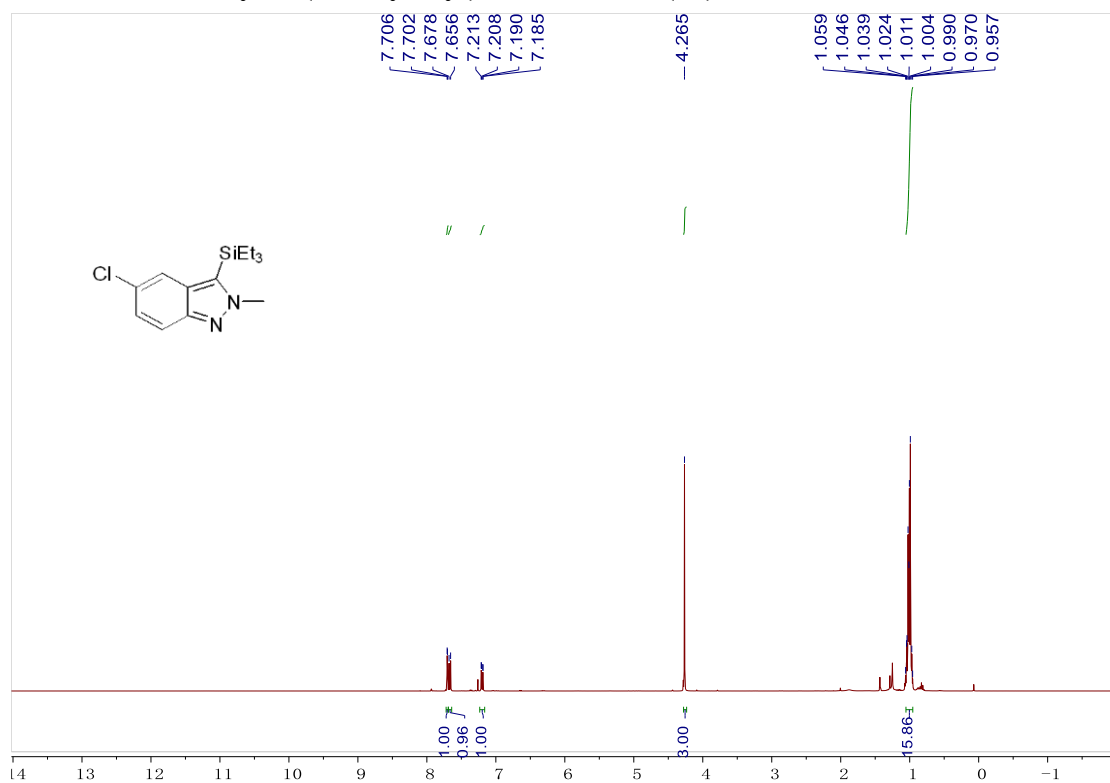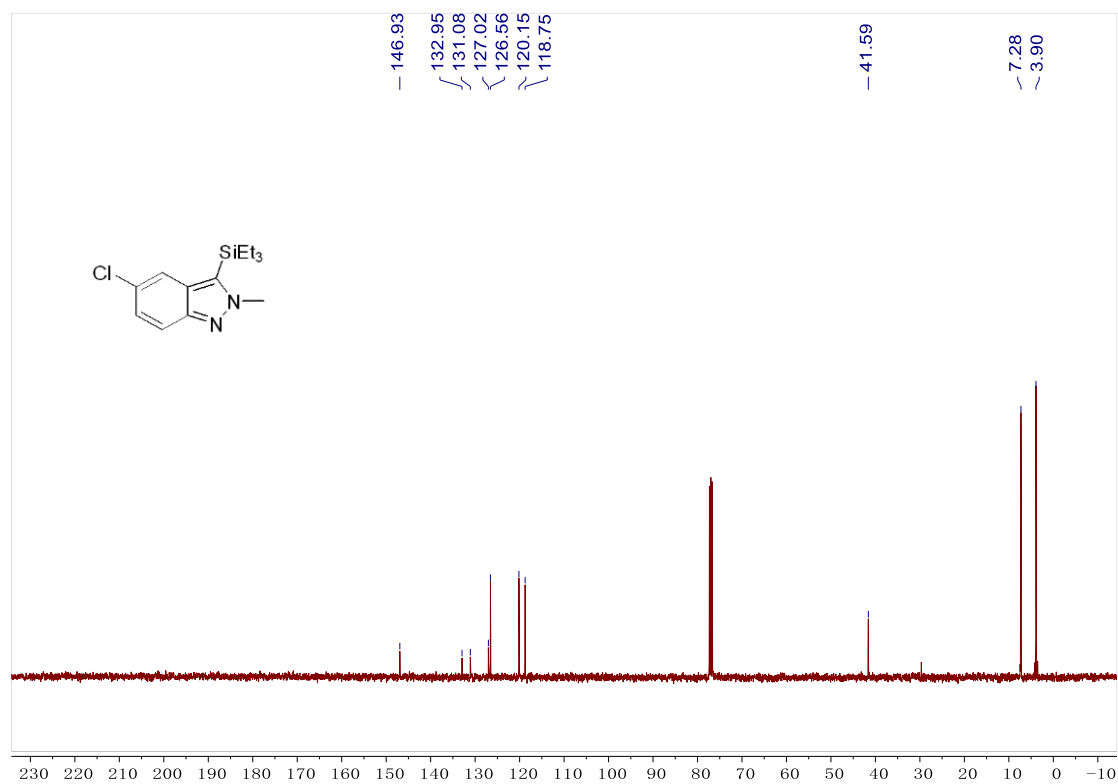



## 2-Methyl-6-phenyl-3-(triethylsilyl)-2H-indazole (22)

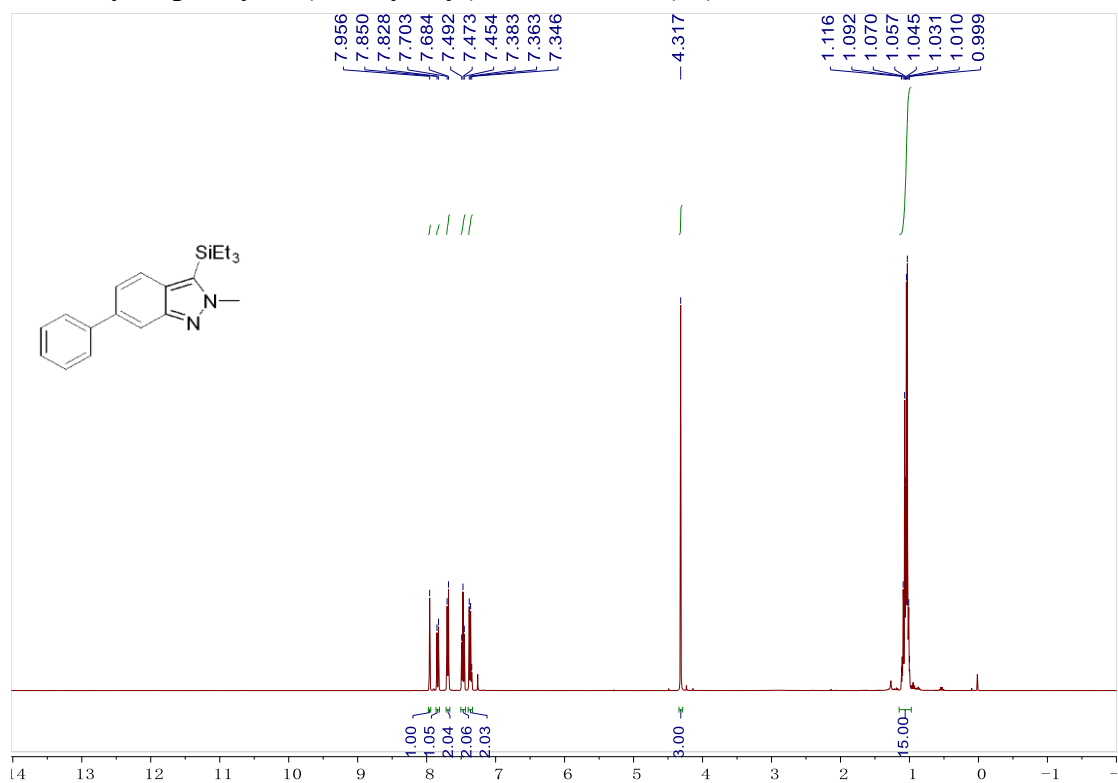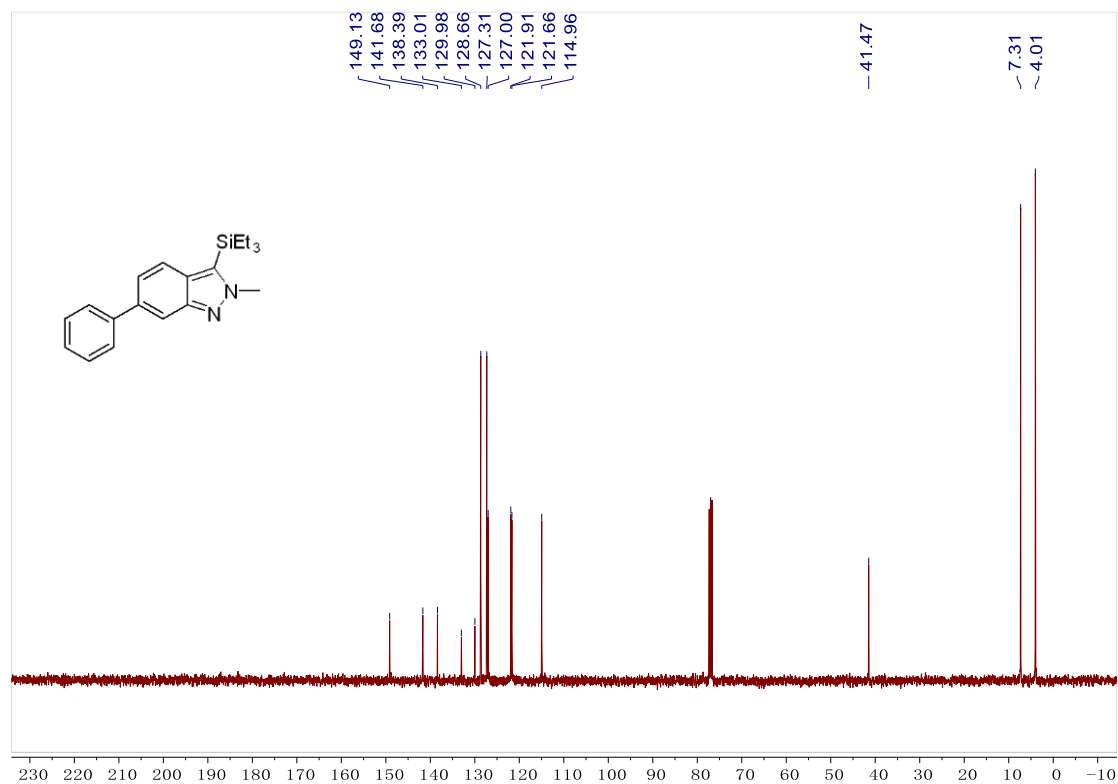

### 6-(3,5-Dimethoxyphenyl)-2-methyl-3-(triethylsilyl)-2H-indazole (23)

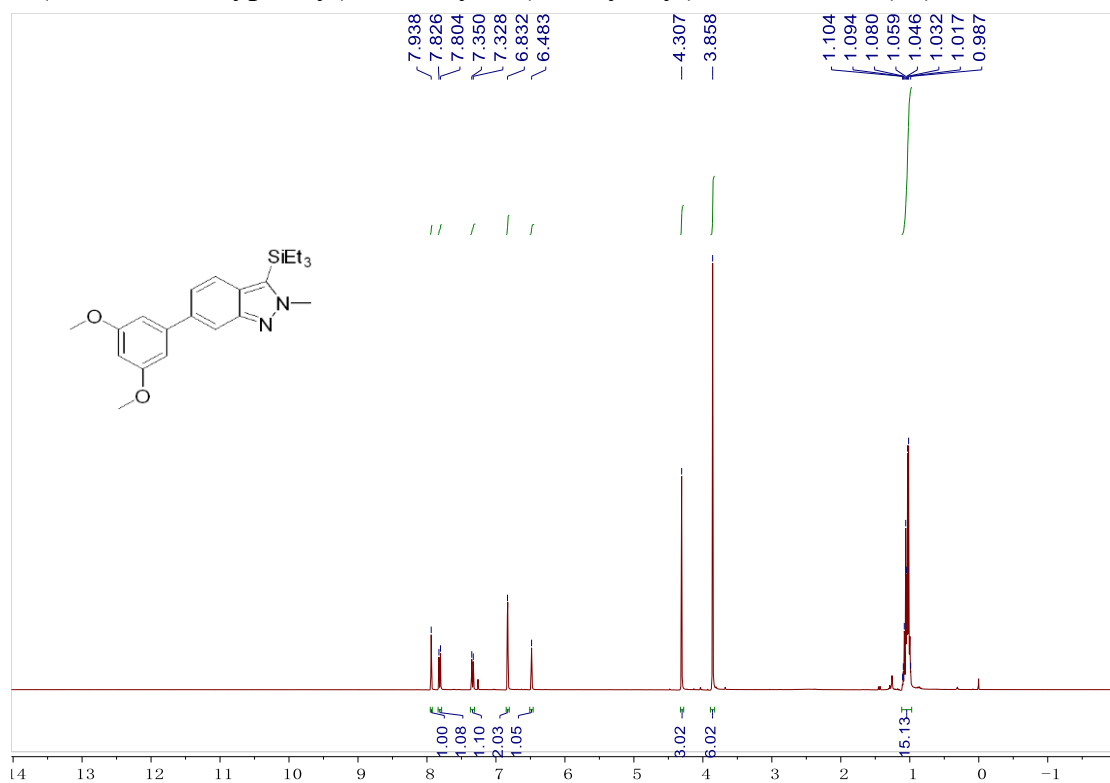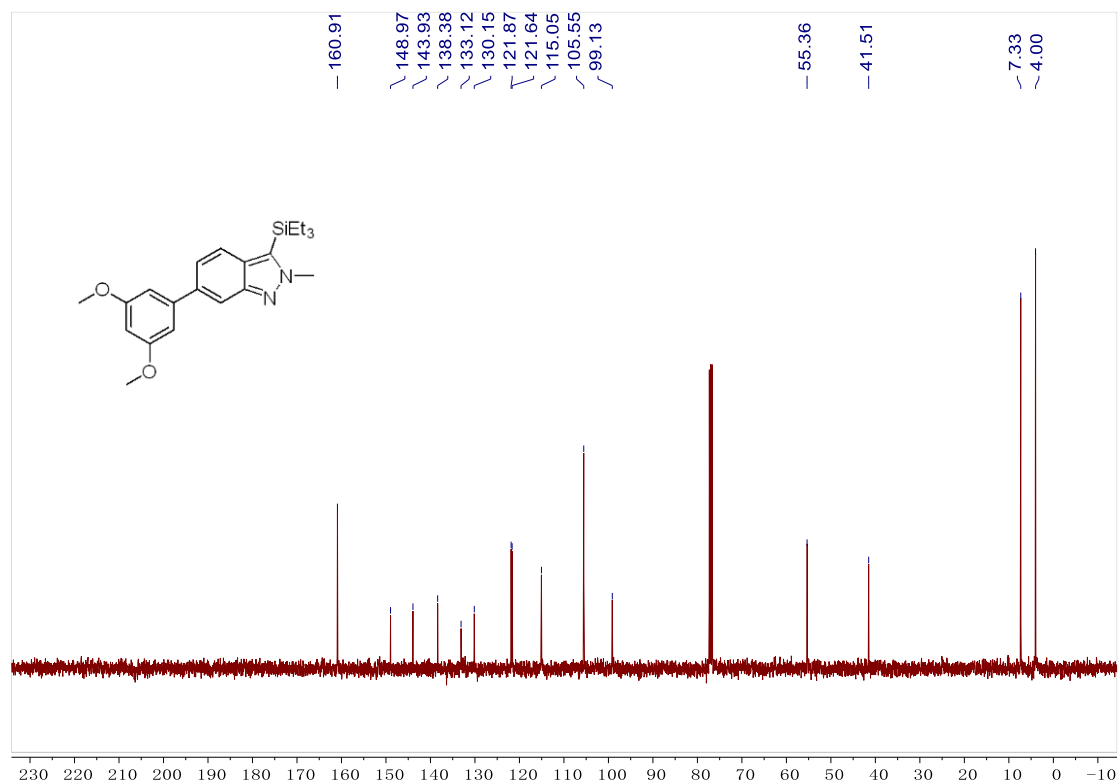

## 2-Methyl-6-(4-phenoxyphenyl)-3-(triethylsilyl)-2H-indazole (24)

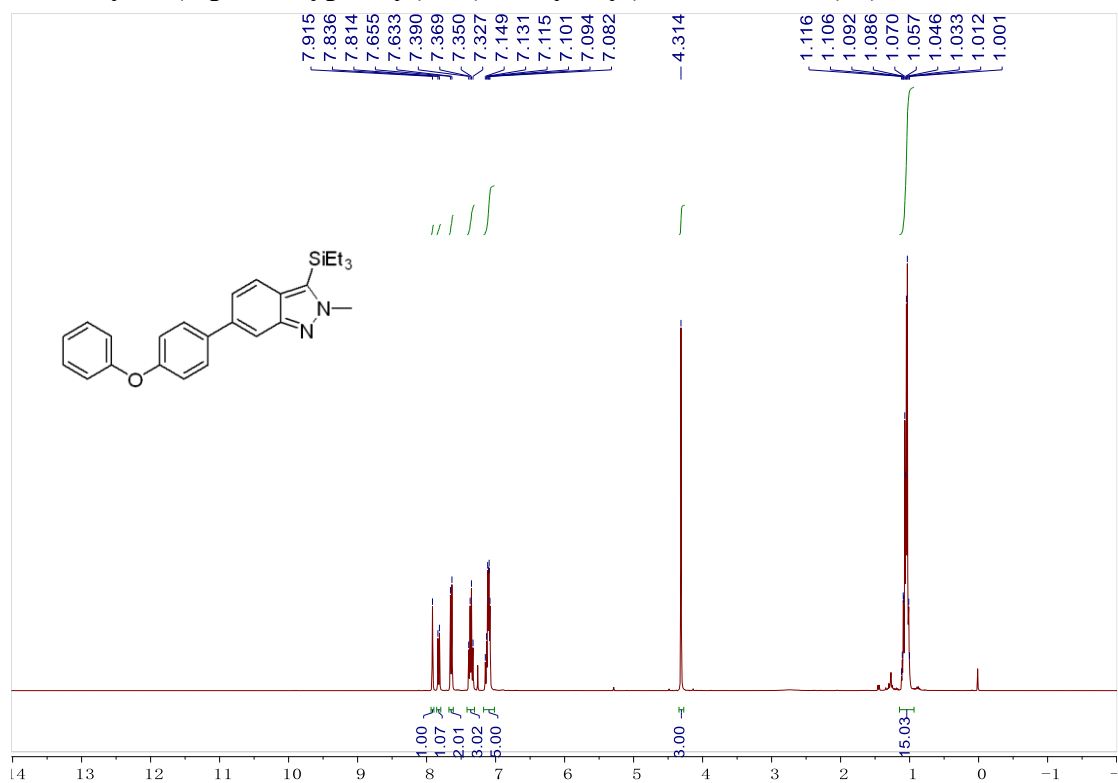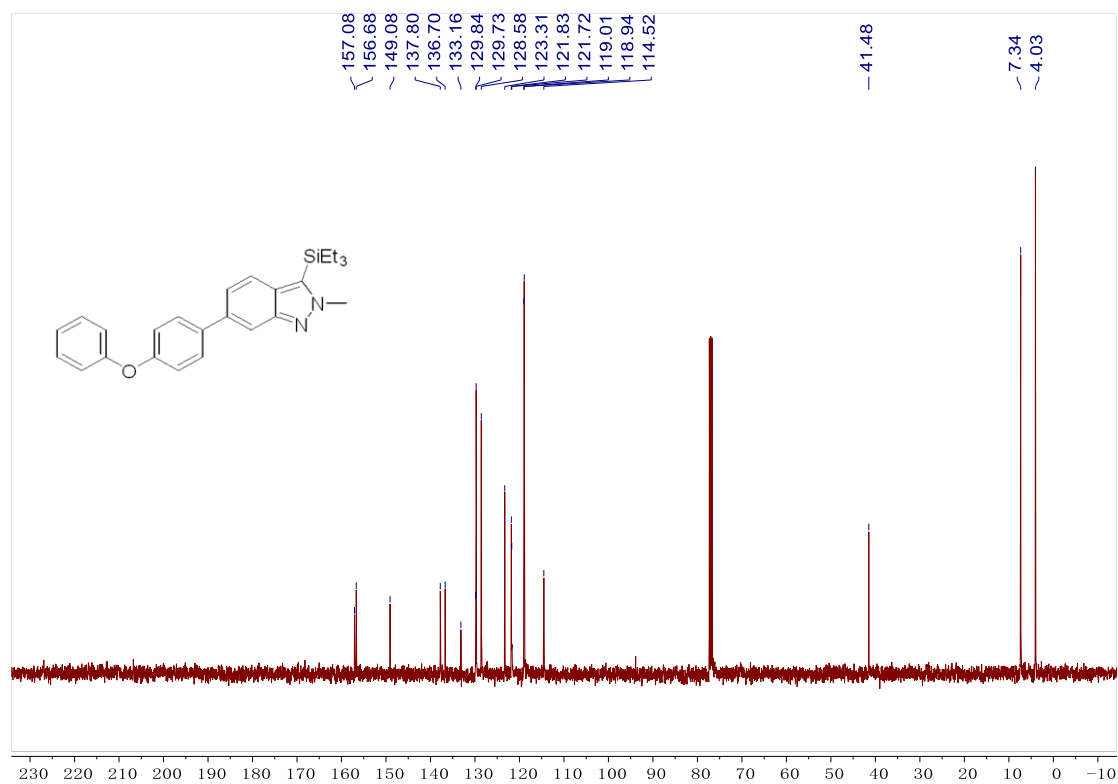

6-(Benzo[b]thiophen-3-yl)-2-methyl-3-(triethylsilyl)-2H-indazole (25)

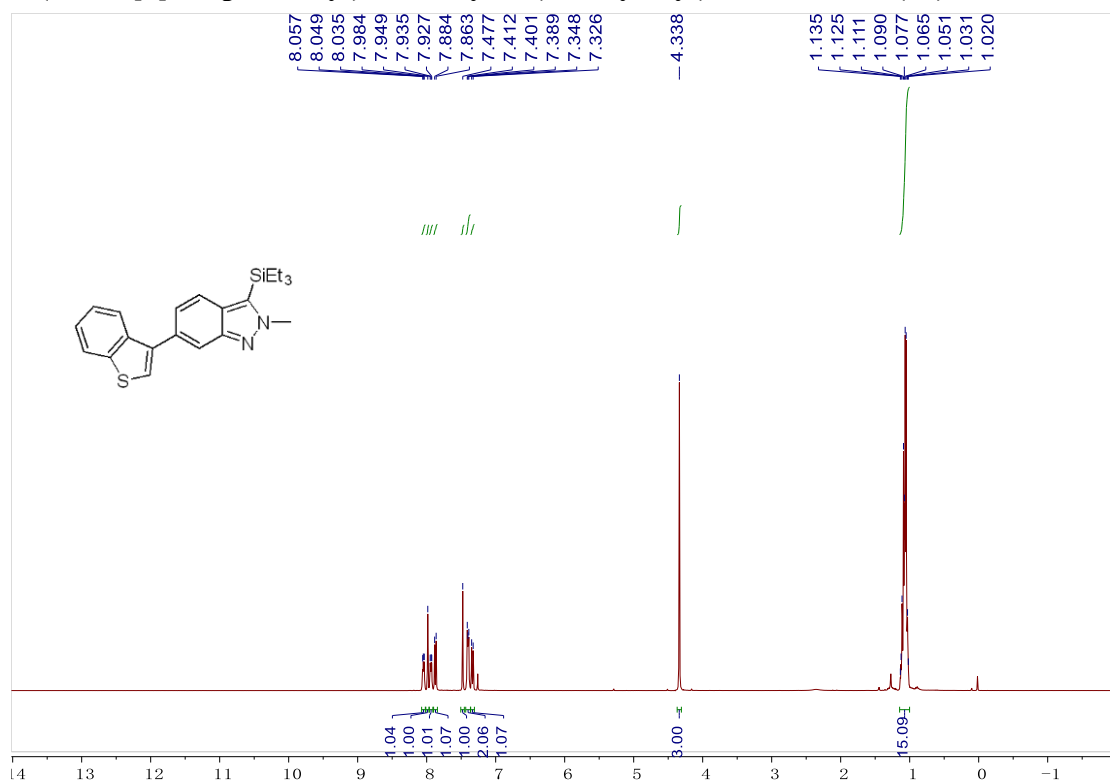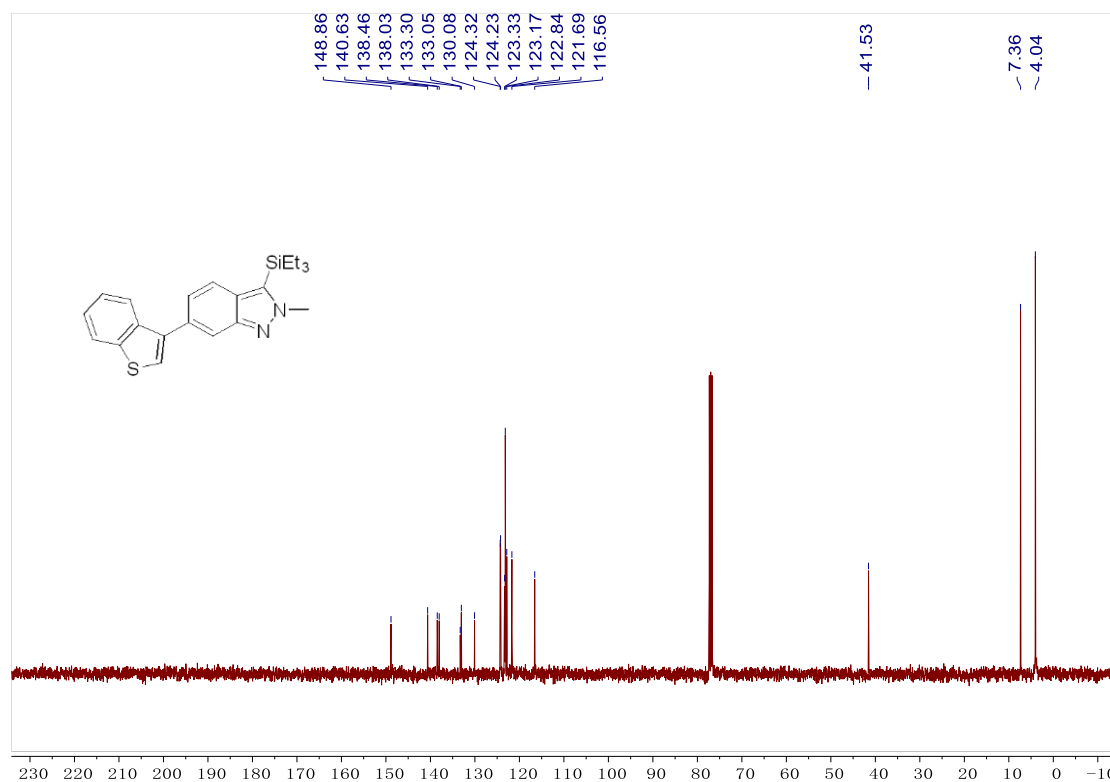

**6-(3,5-Difluorophenyl)-2-methyl-3-(triethylsilyl)-2H-indazole (26)**

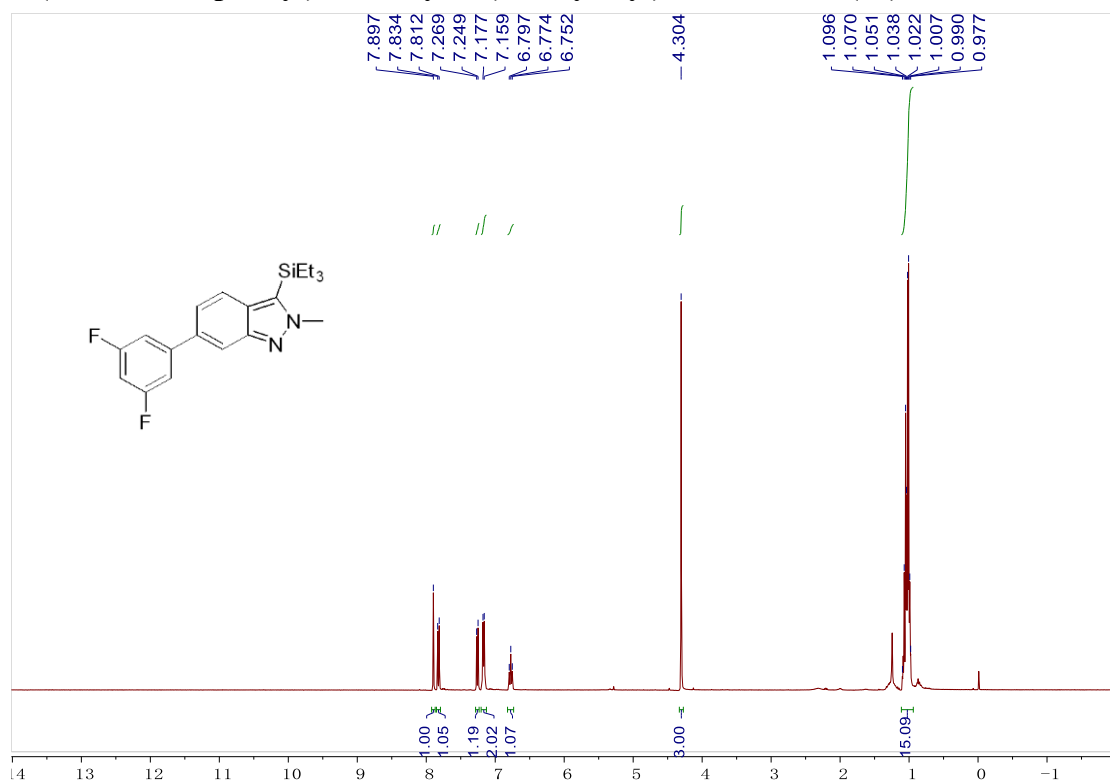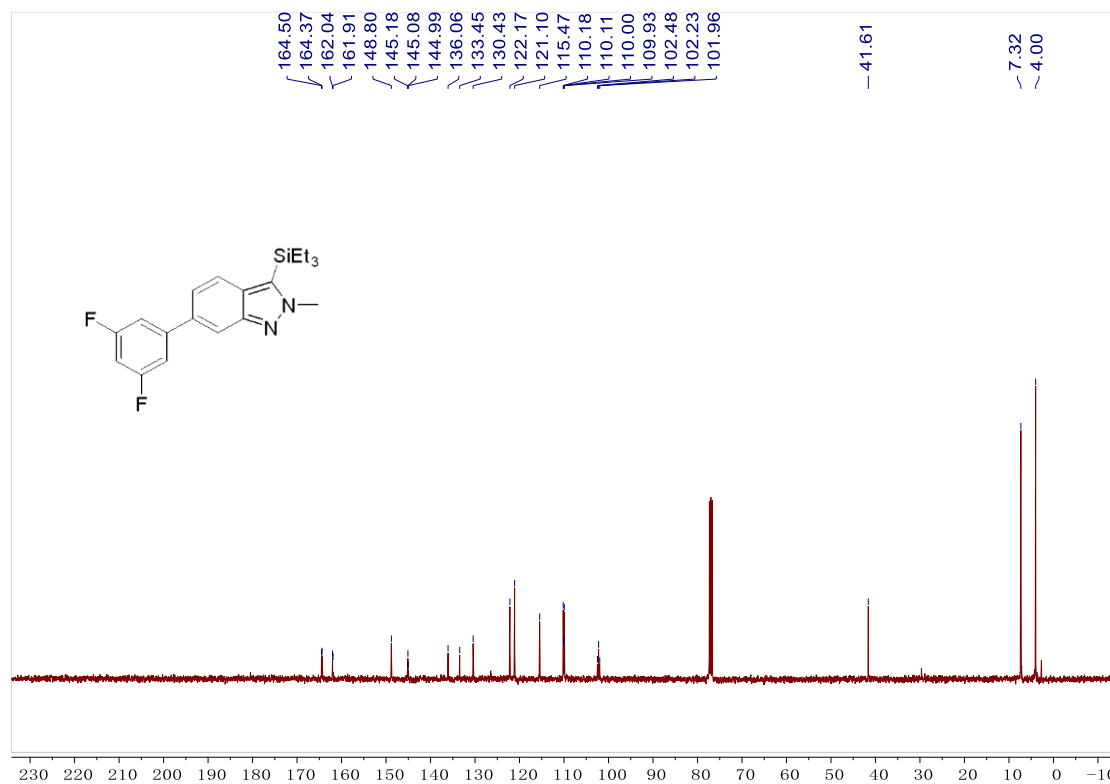

### 7-(Benzo[d][1,3]dioxol-5-yl)-2-methyl-3-(triethylsilyl)-2H-indazole (27)

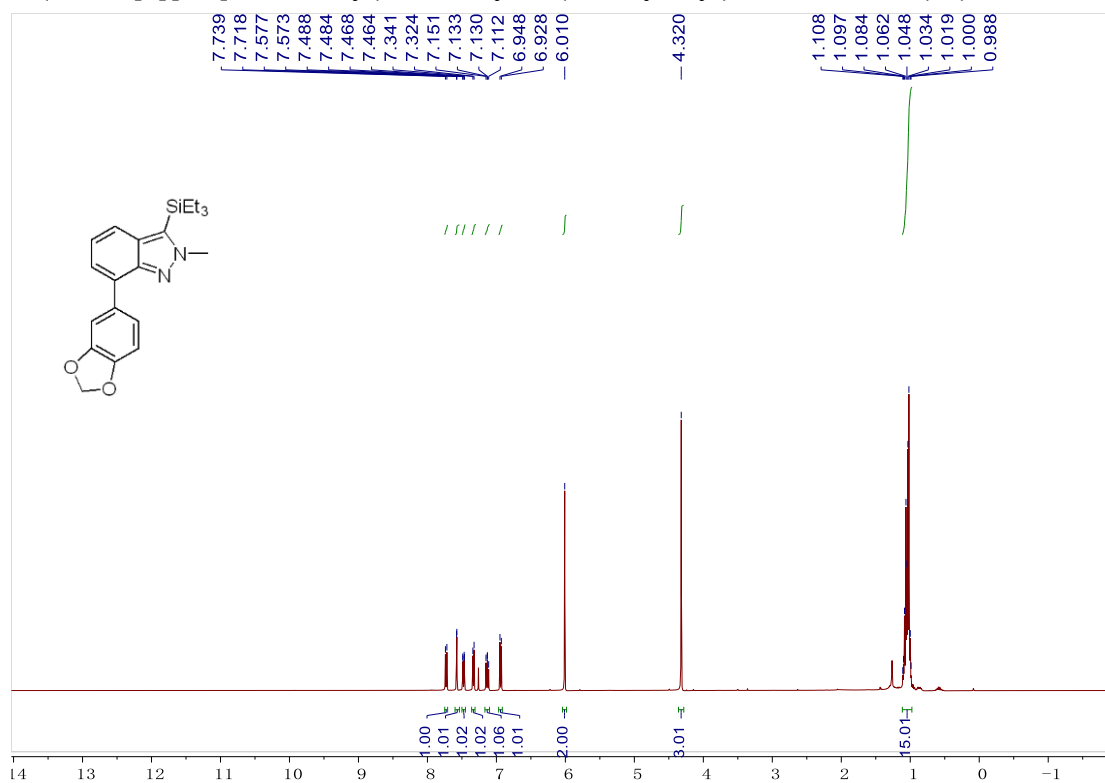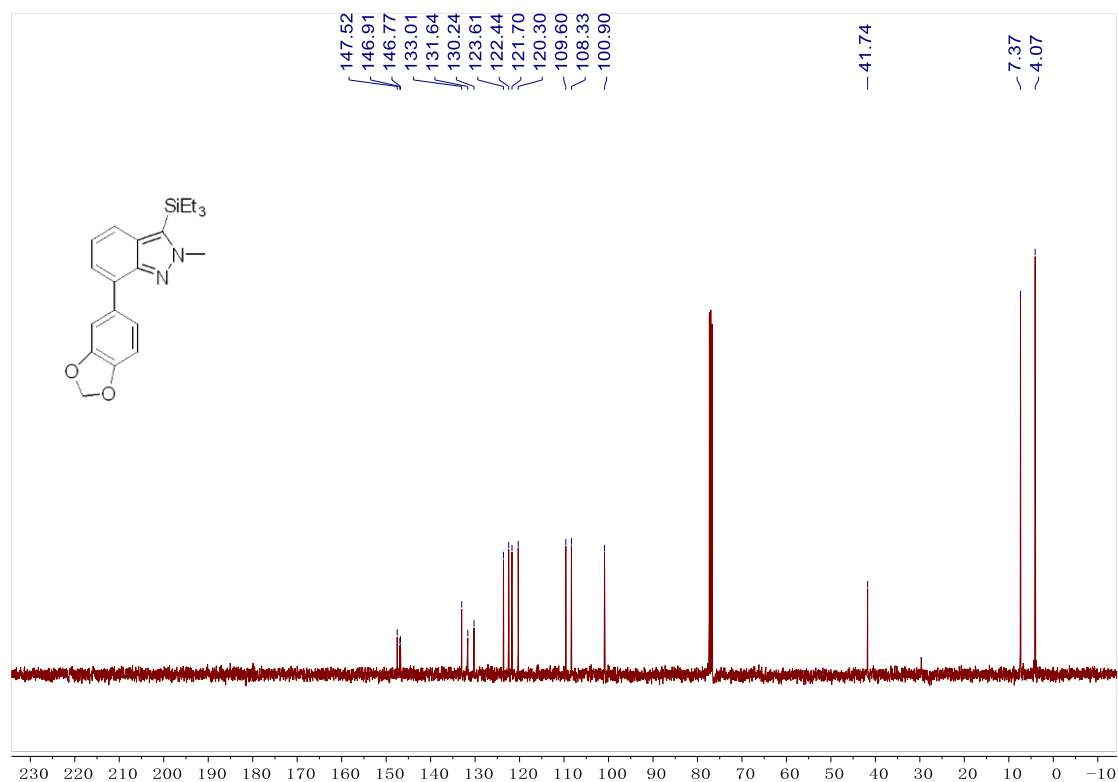

## 2-Methyl-3-(triethylsilyl)-7-(4-(trimethylsilyl)phenyl)-2H-indazole (28)

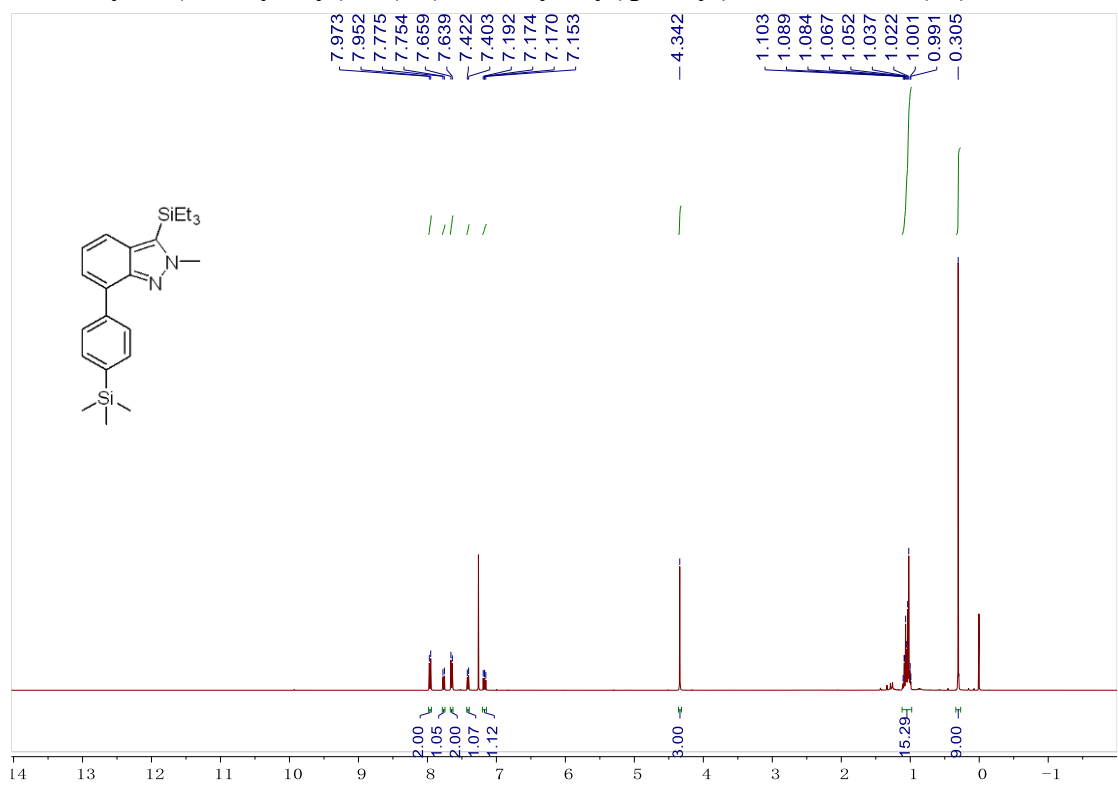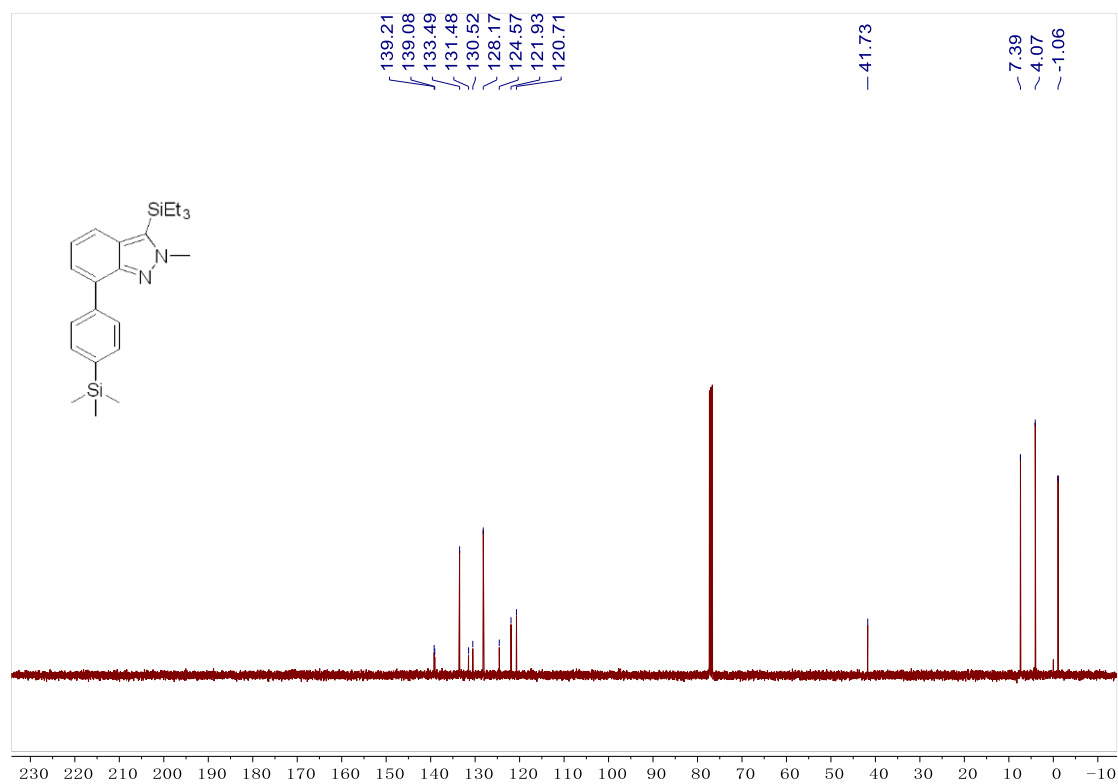

### 7-(4-Chlorophenyl)-2-methyl-3-(triethylsilyl)-2H-indazole (29)

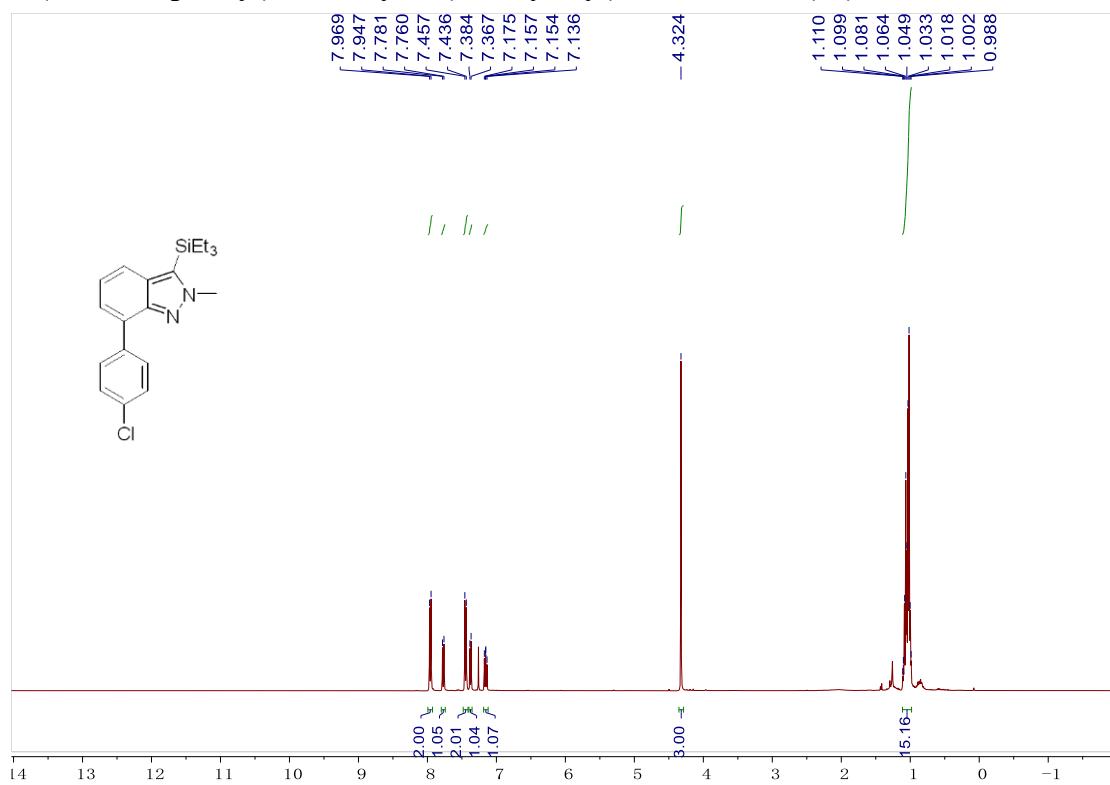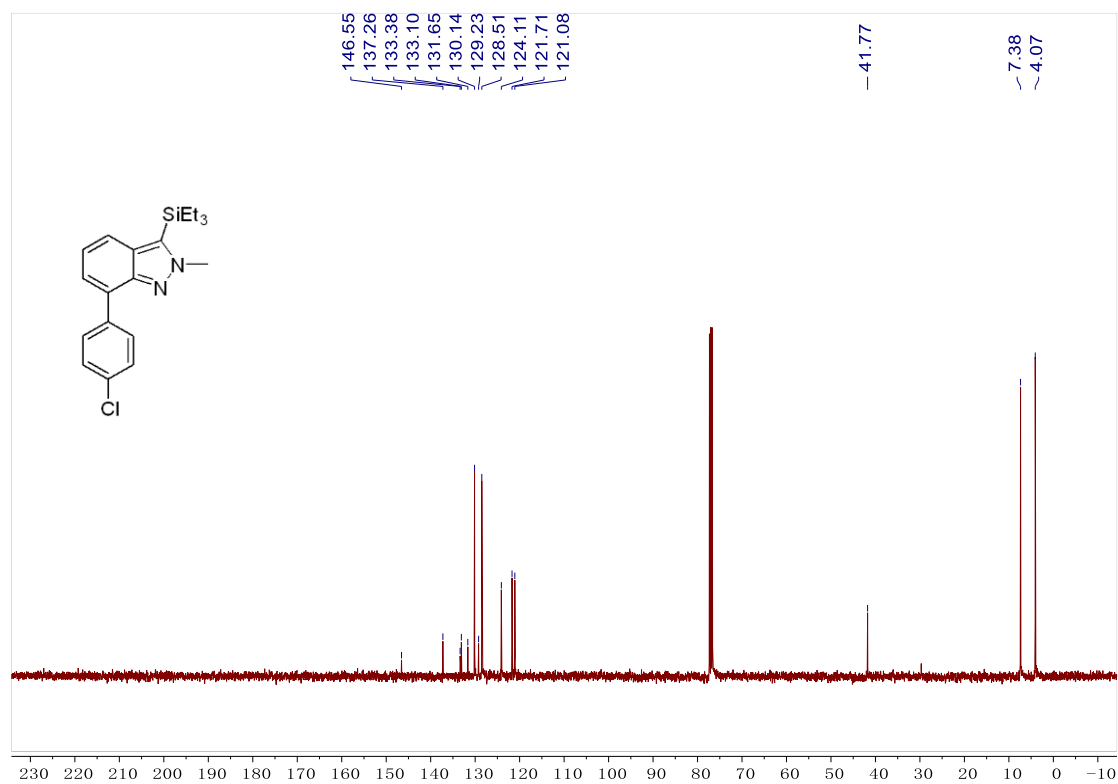



**4-(4-(2-Methyl-3-(triethylsilyl)-2H-indazol-7-yl)phenyl)morpholine (30)**

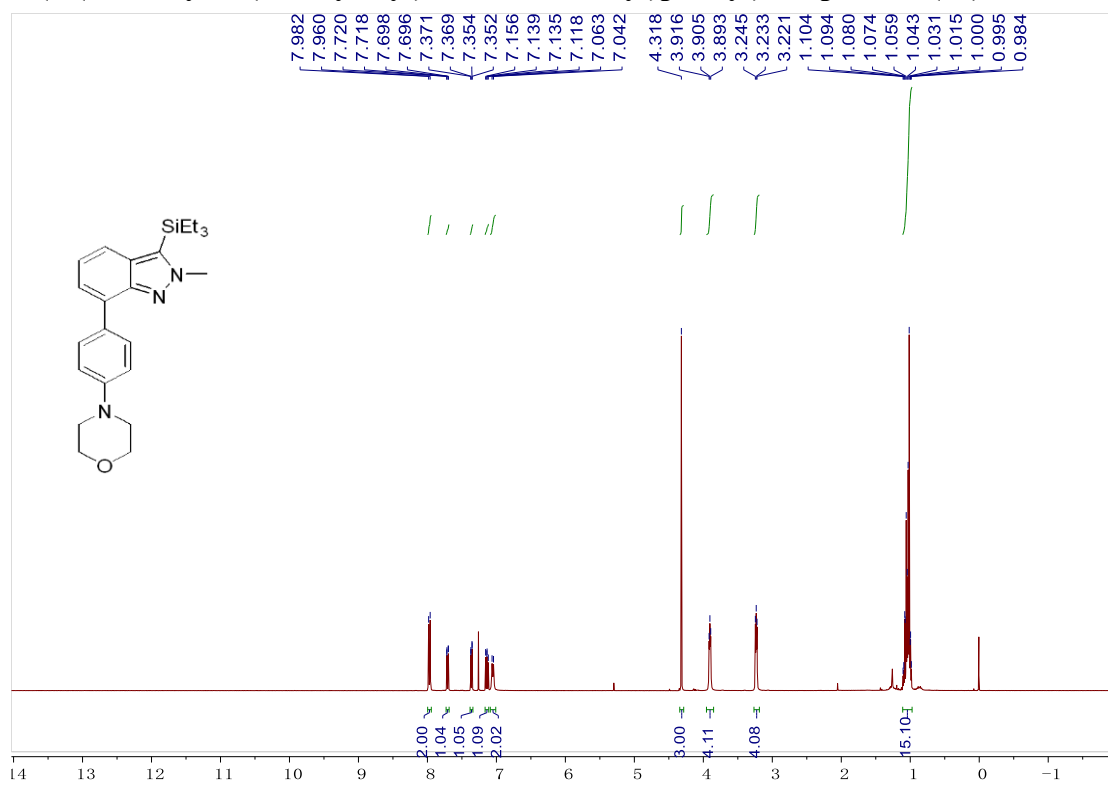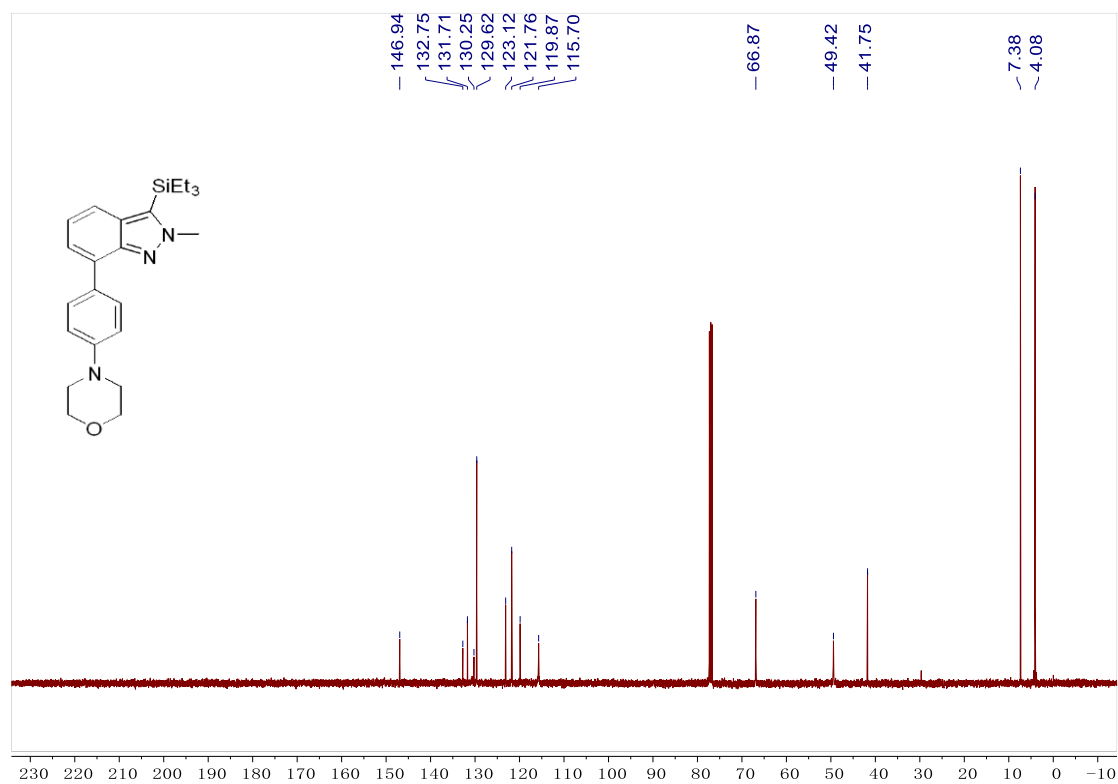

**7-(Furan-3-yl)-2-methyl-3-(triethylsilyl)-2H-indazole (31)**

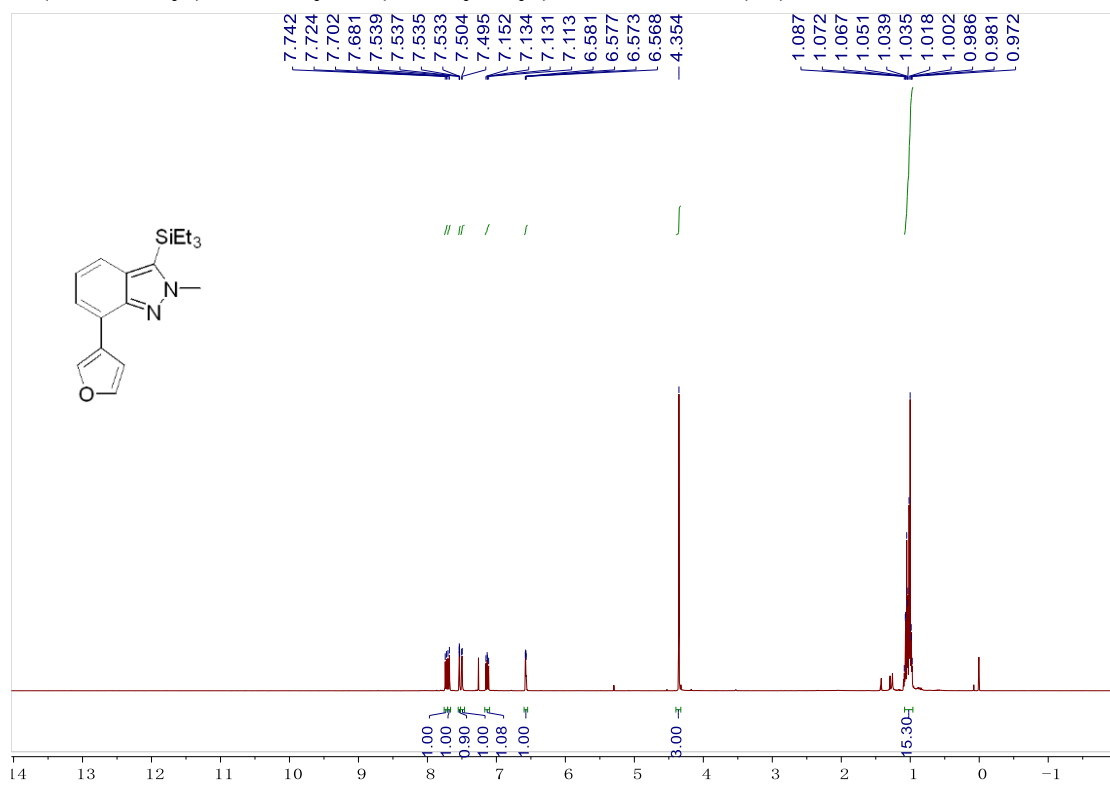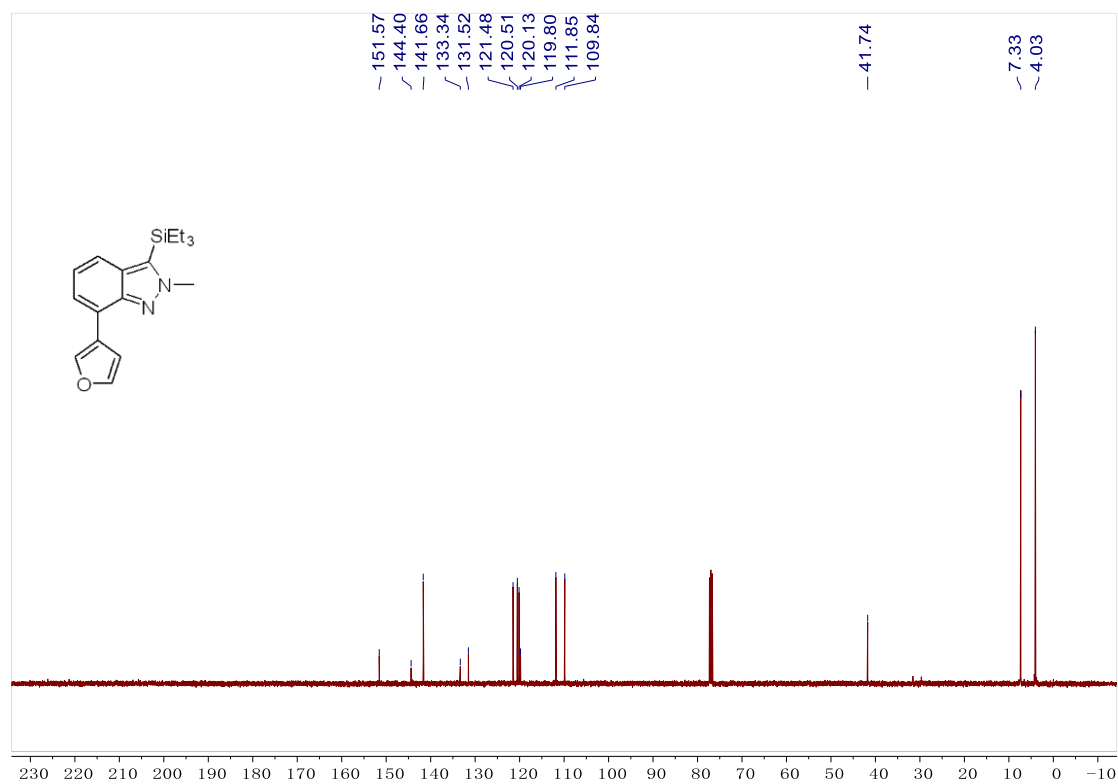

## 2-Phenyl-3-(triethylsilyl)-2H-indazole (32)

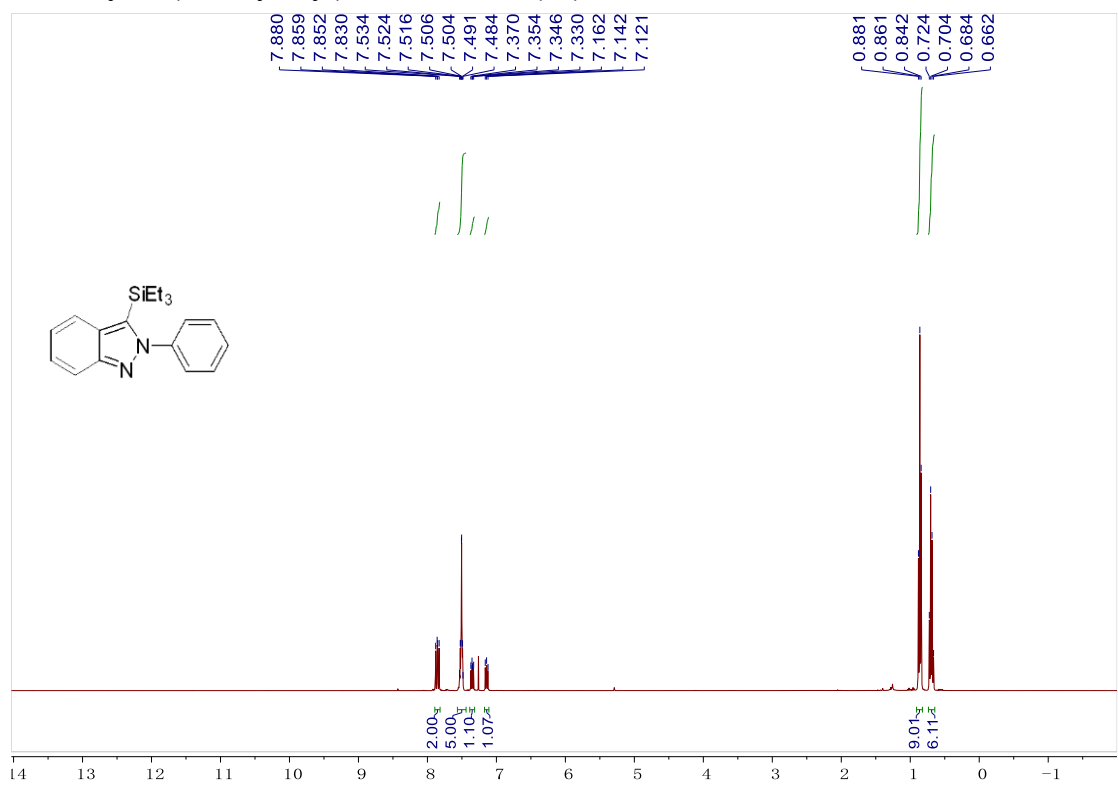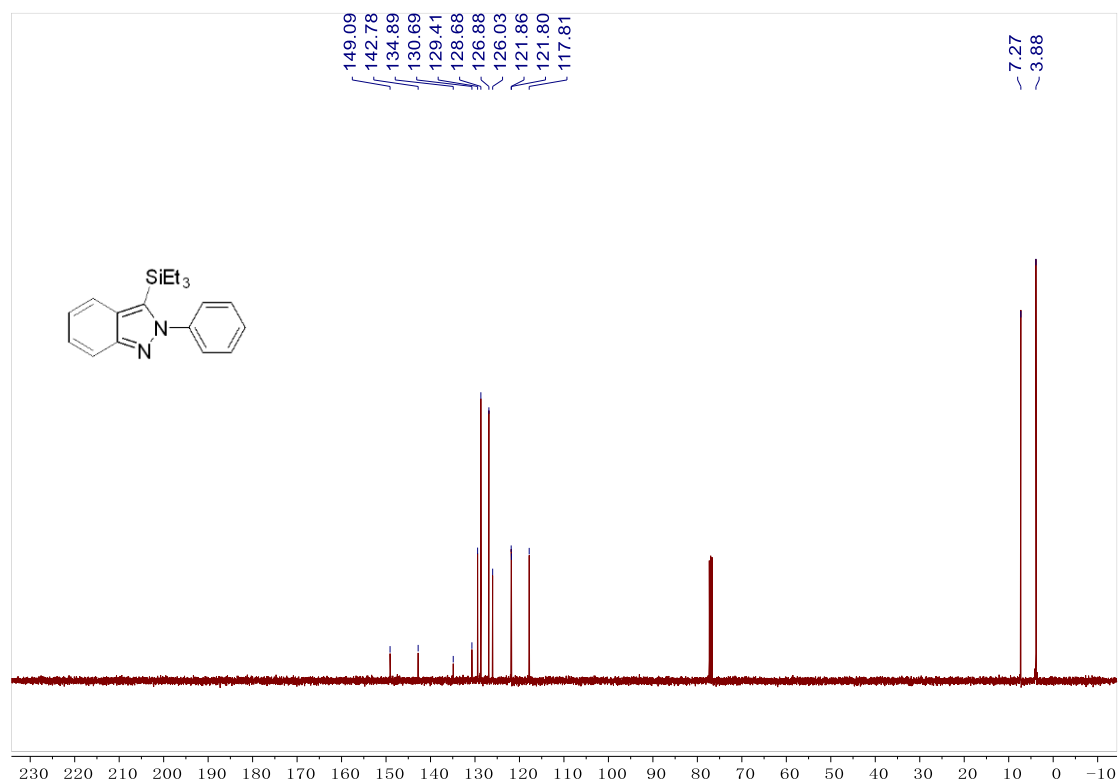

### 2-(3,5-Dimethylphenyl)-3-(triethylsilyl)-2H-indazole (33)

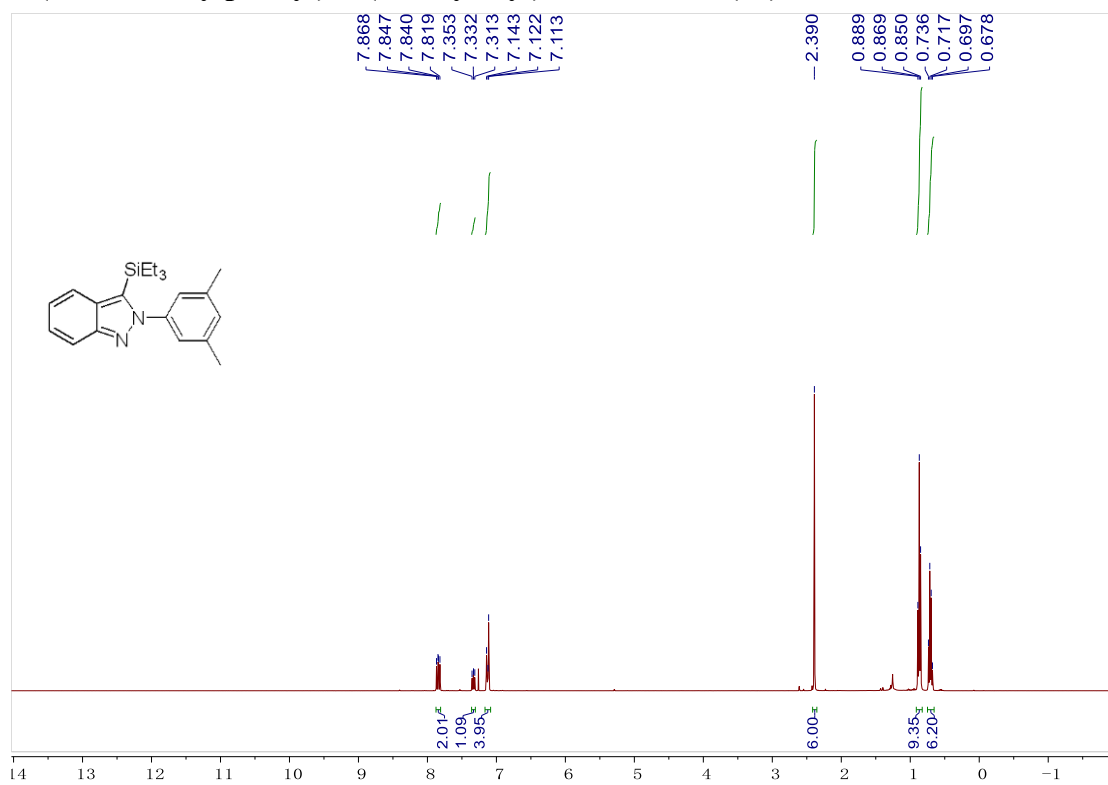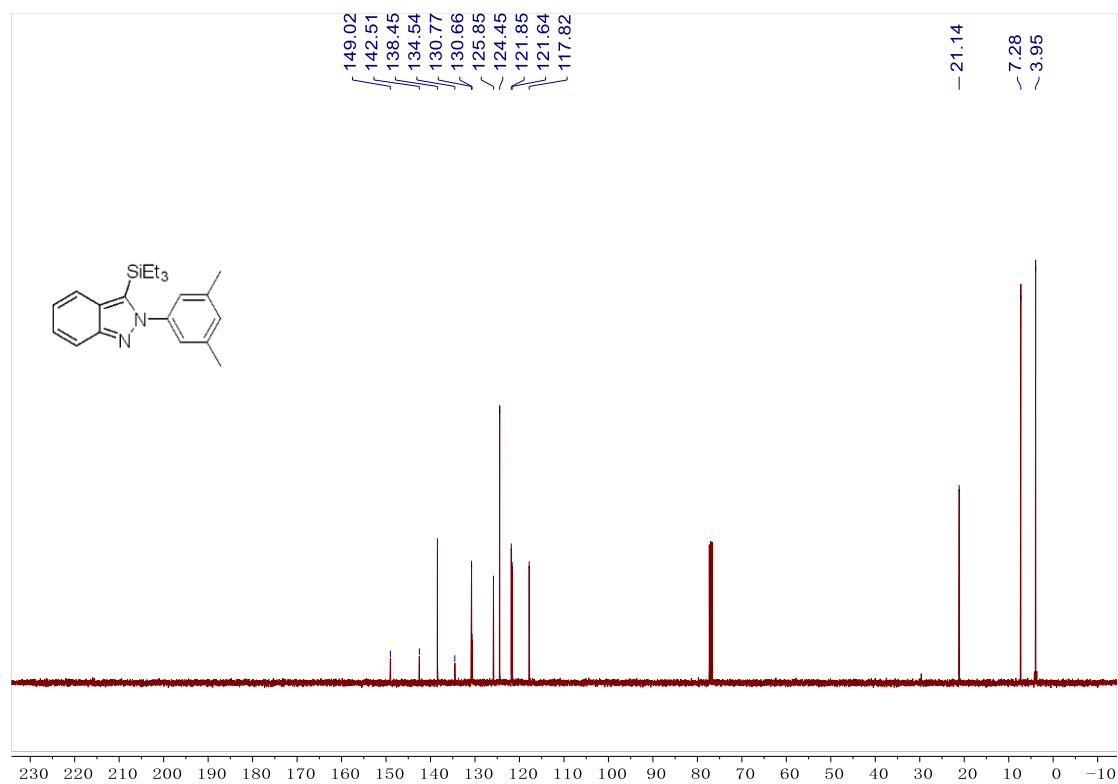

**2-(4-(4-Propylcyclohexyl)phenyl)-3-(triethylsilyl)-2H-indazole (34)**

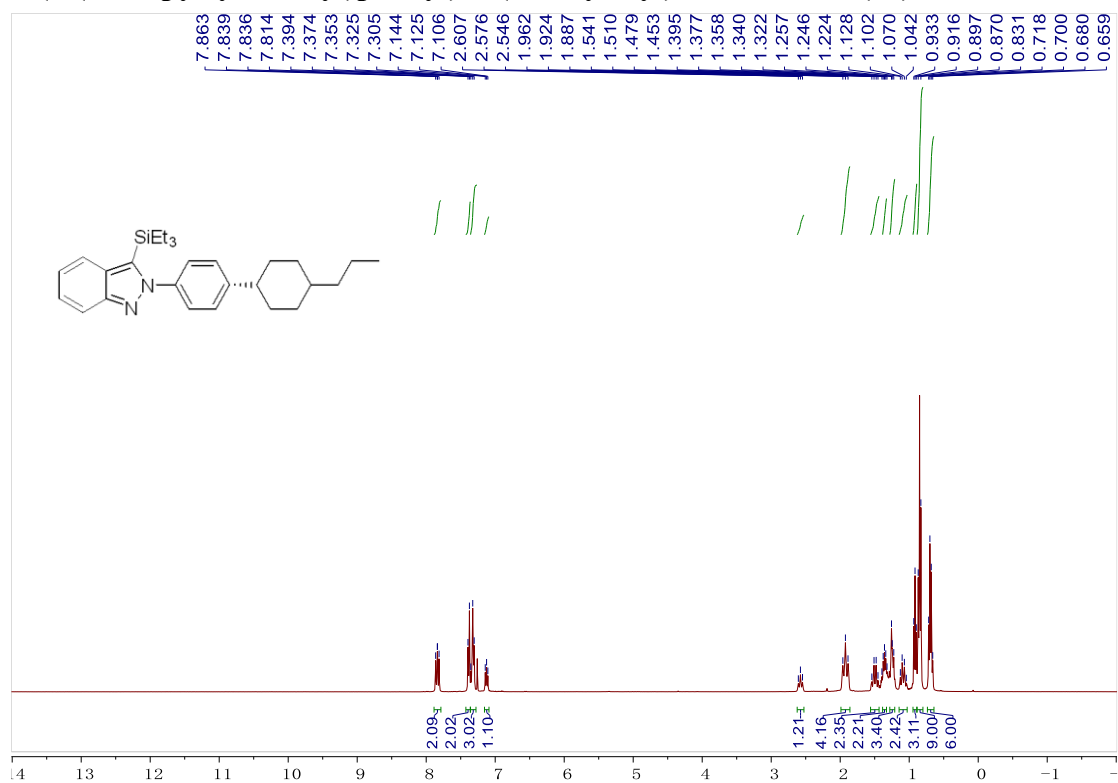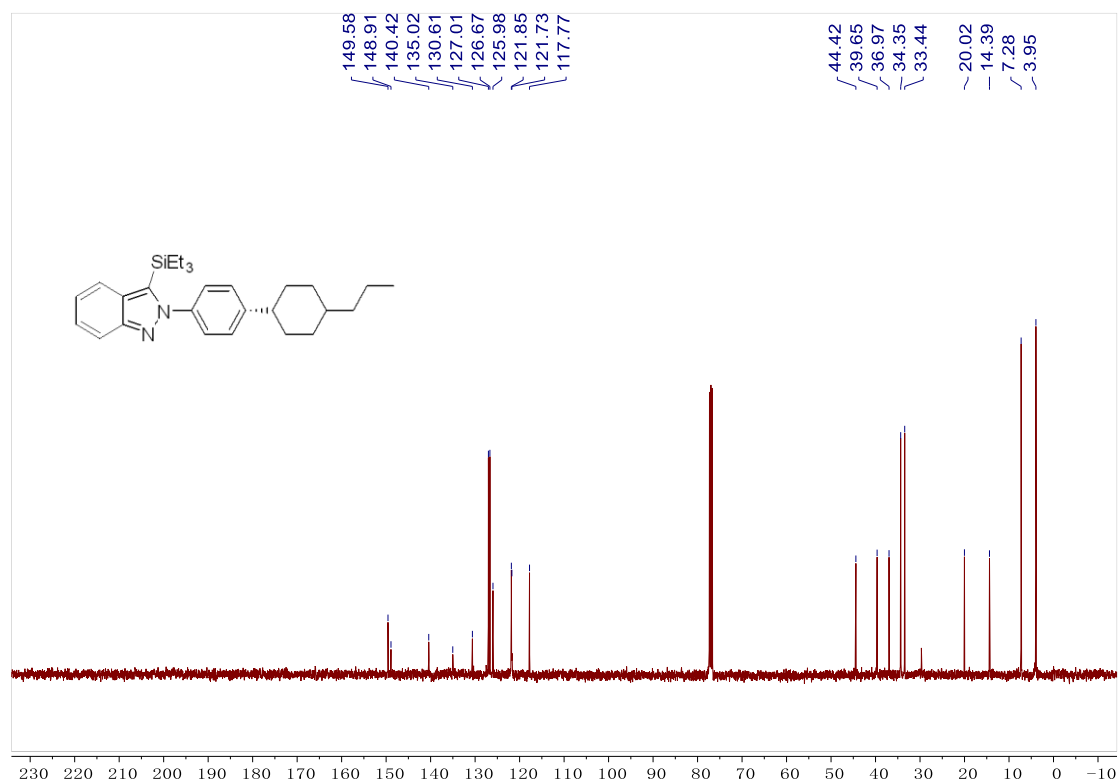

### 2-(4-Fluorophenyl)-3-(triethylsilyl)-2H-indazole (35)

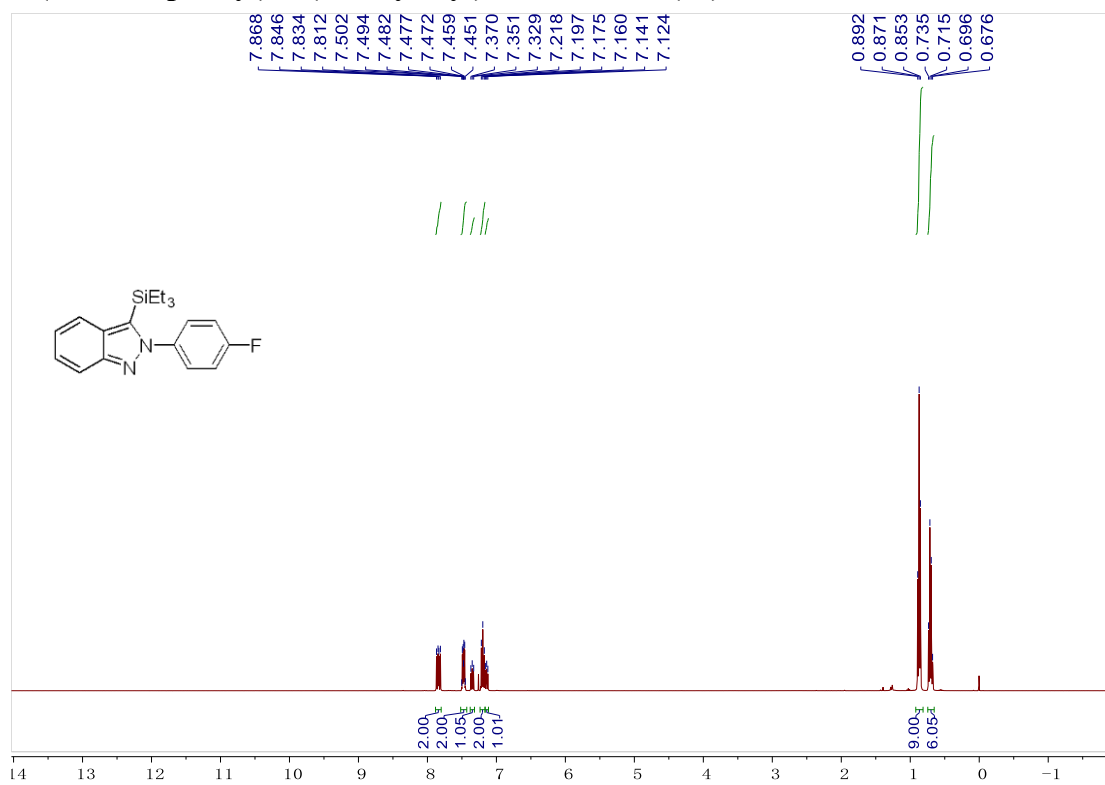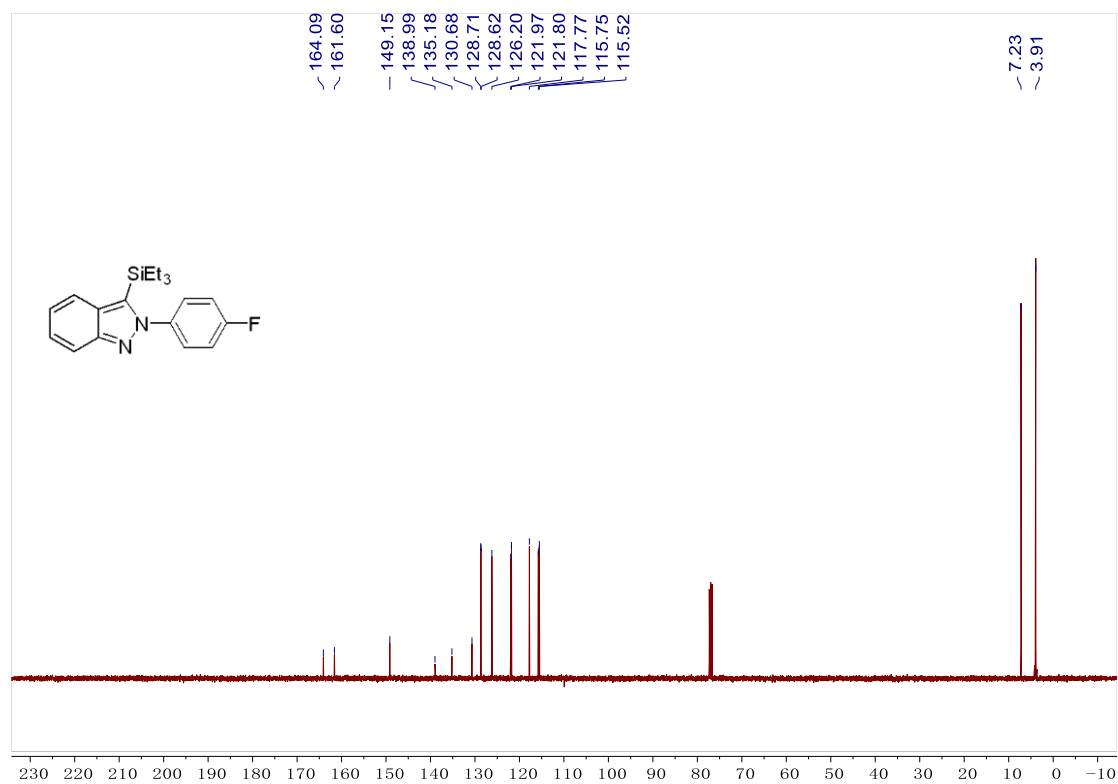

### 3-(Triethylsilyl)-1H-indazole (36)

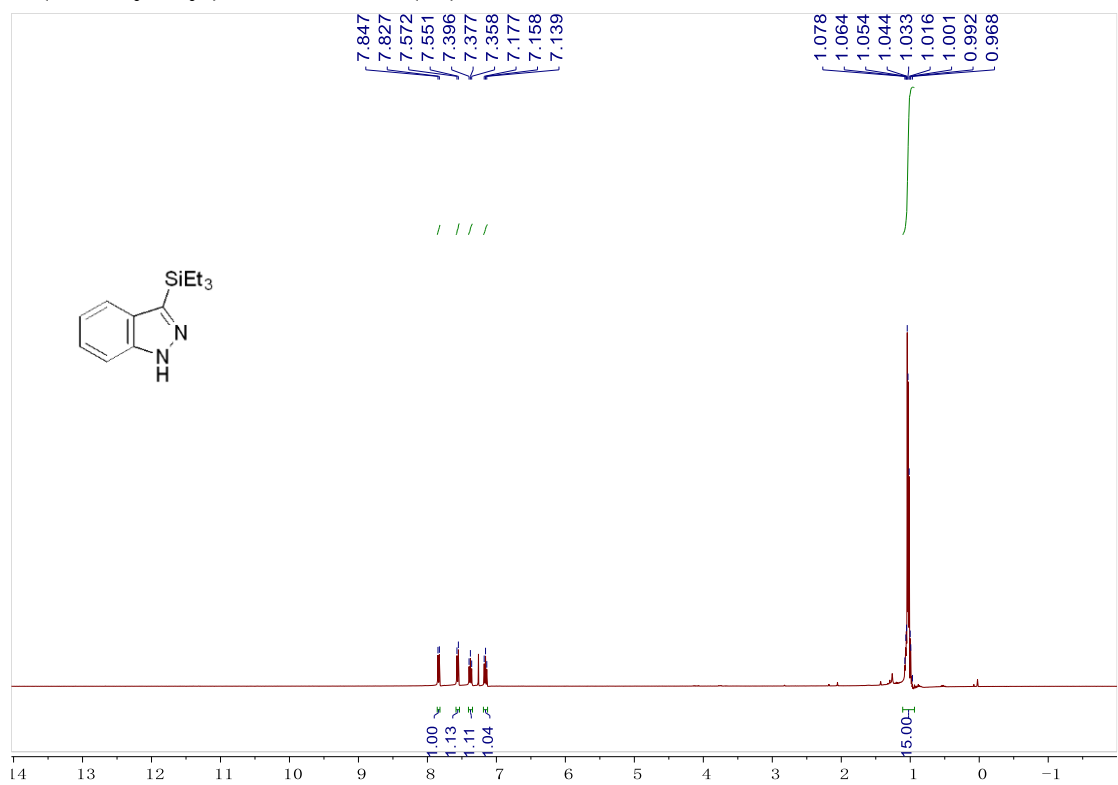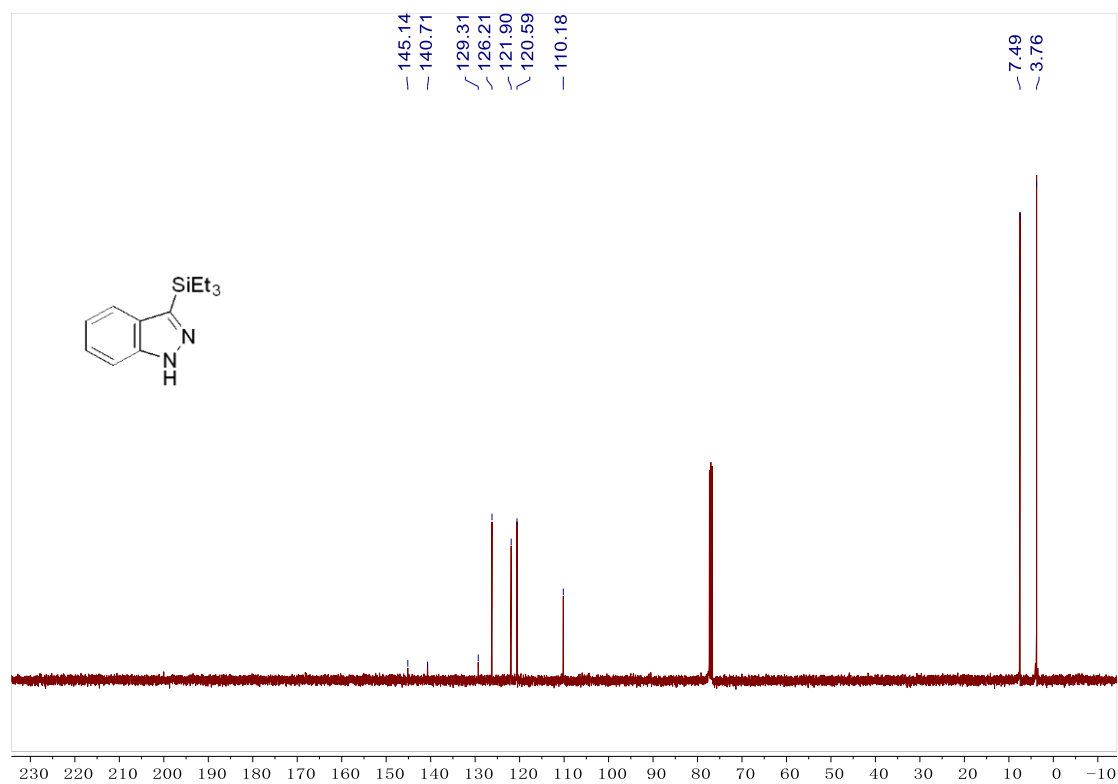

# 1-Phenyl-3-(triethylsilyl)-1H-indazole (36b)

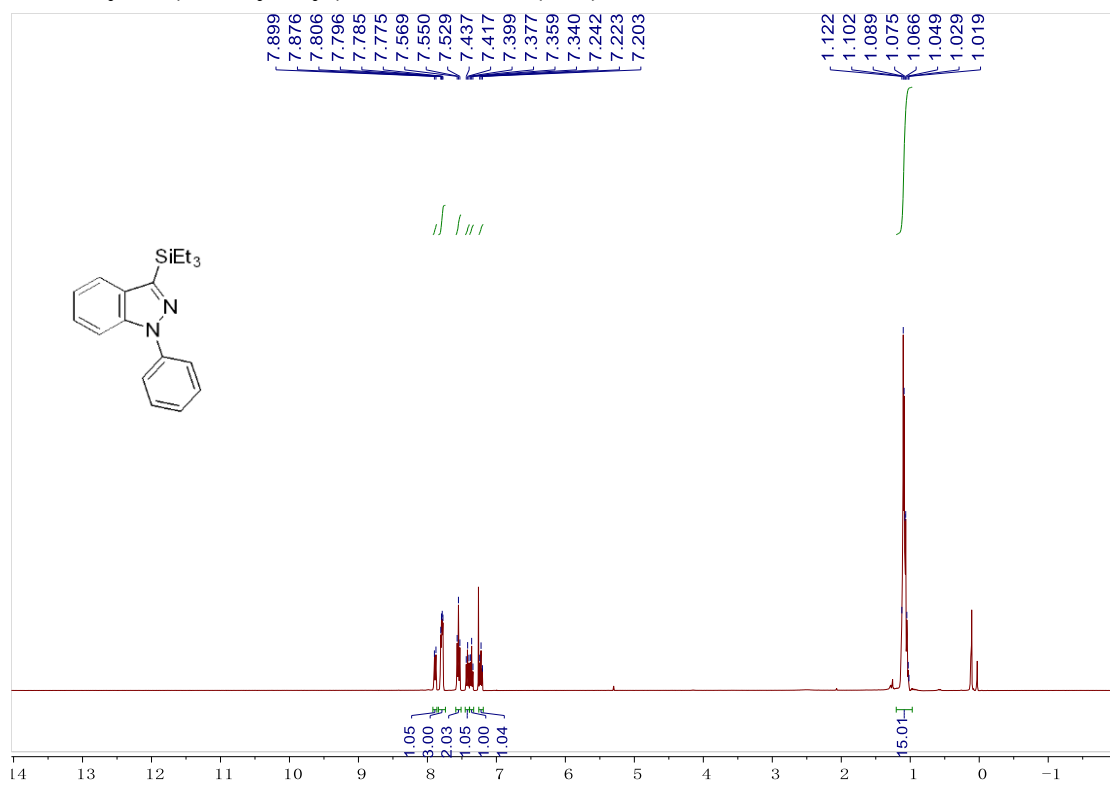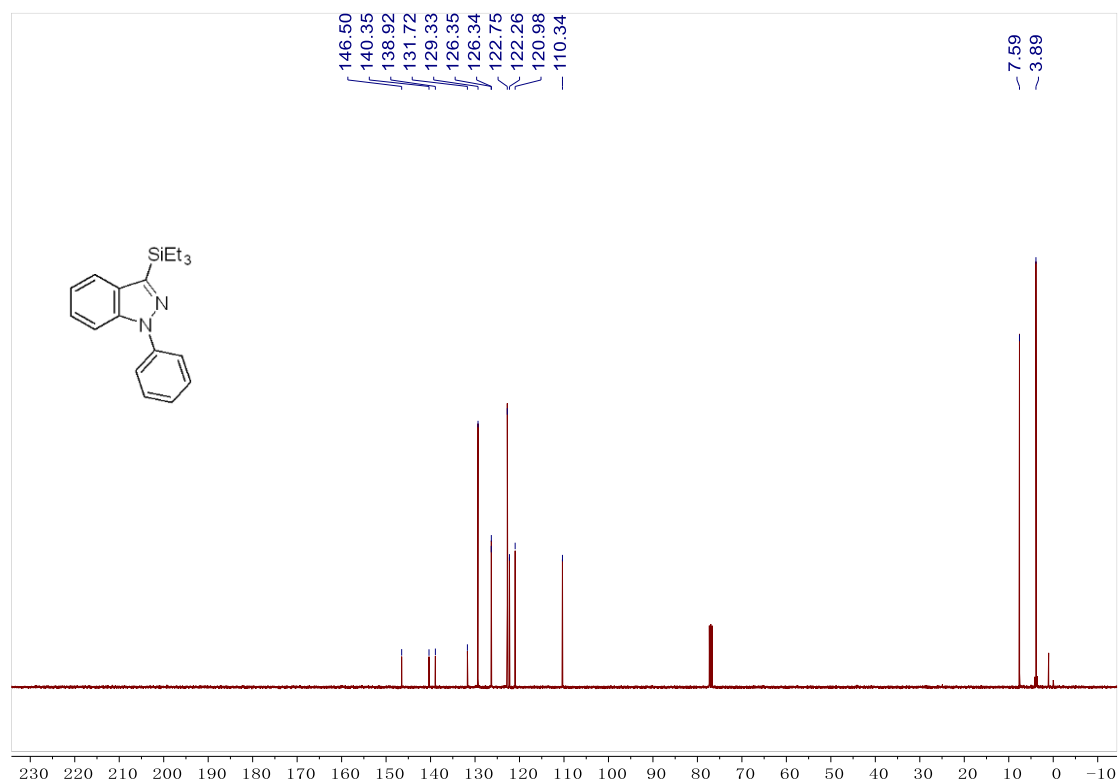



### 4-Phenyl-3-(triethylsilyl)-1H-indazole (37)

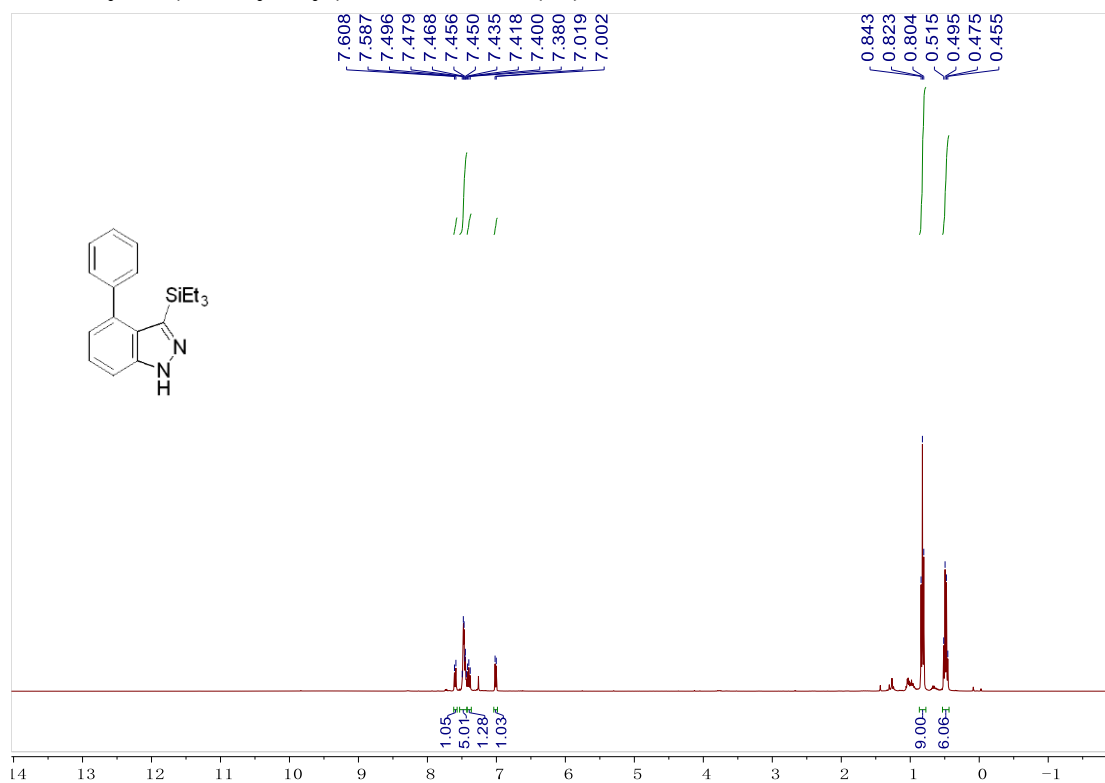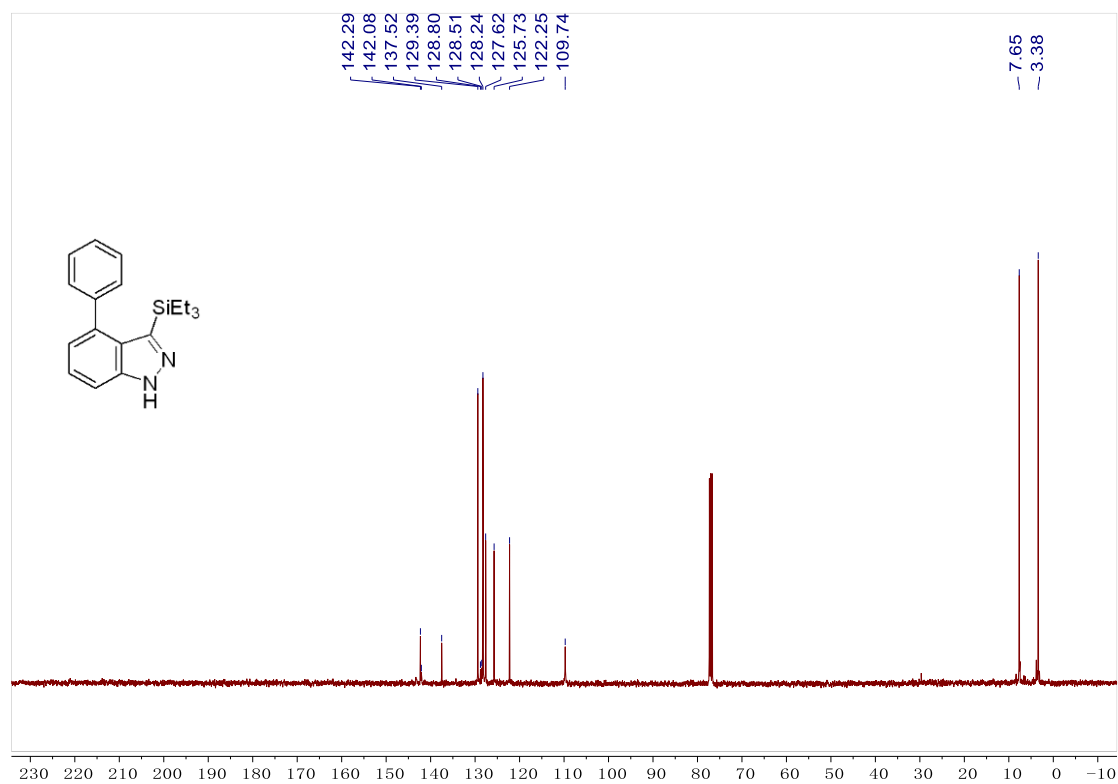

# 1,4-Diphenyl-3-(triethylsilyl)-1*H*-indazole (37b)

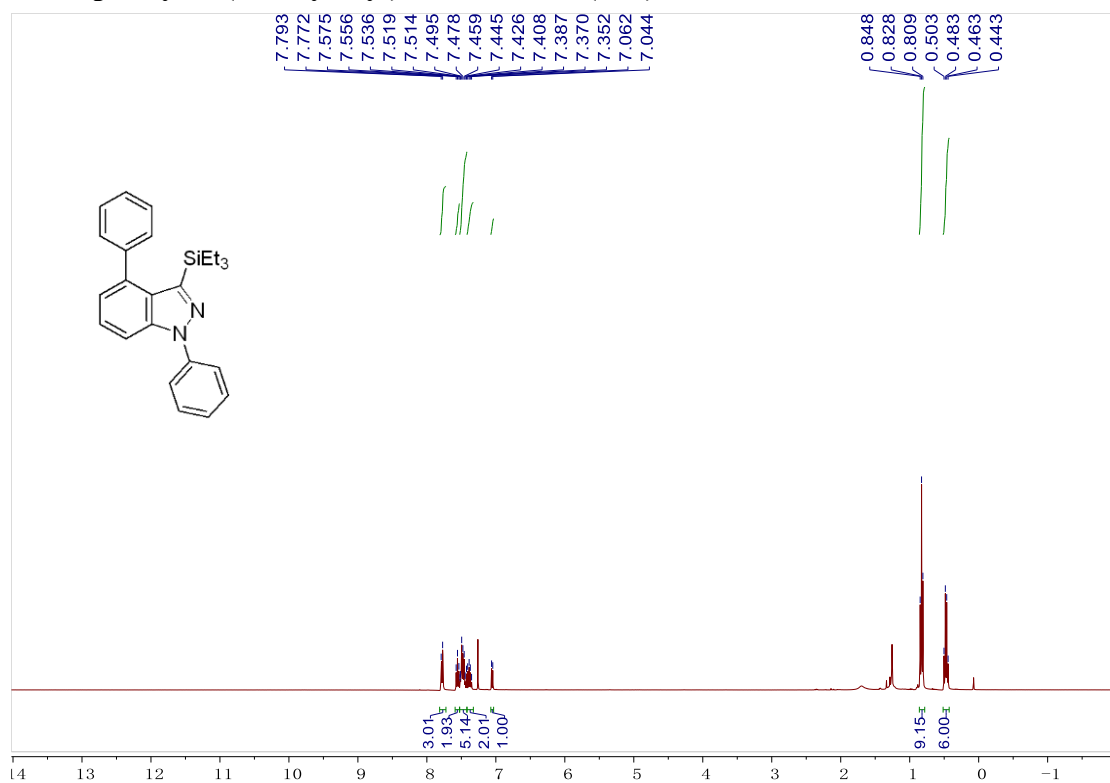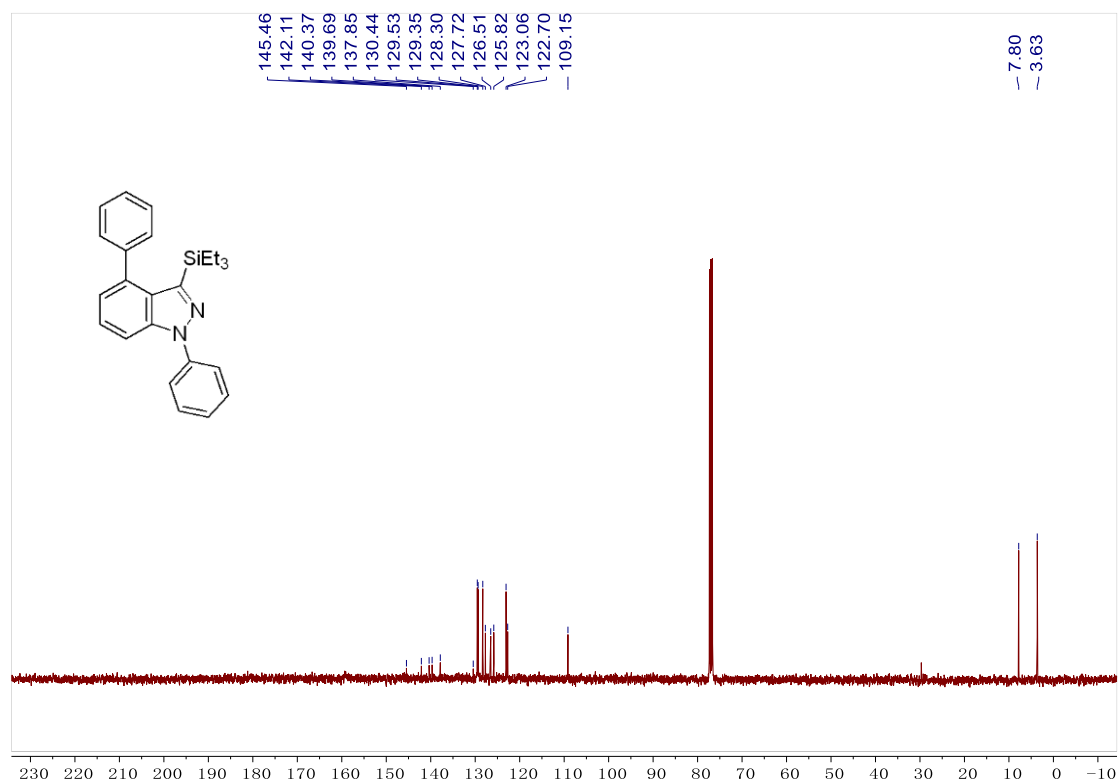

# 5-(4-(*tert*-Butyl)phenyl)-3-(triethylsilyl)-1*H*-indazole (38)

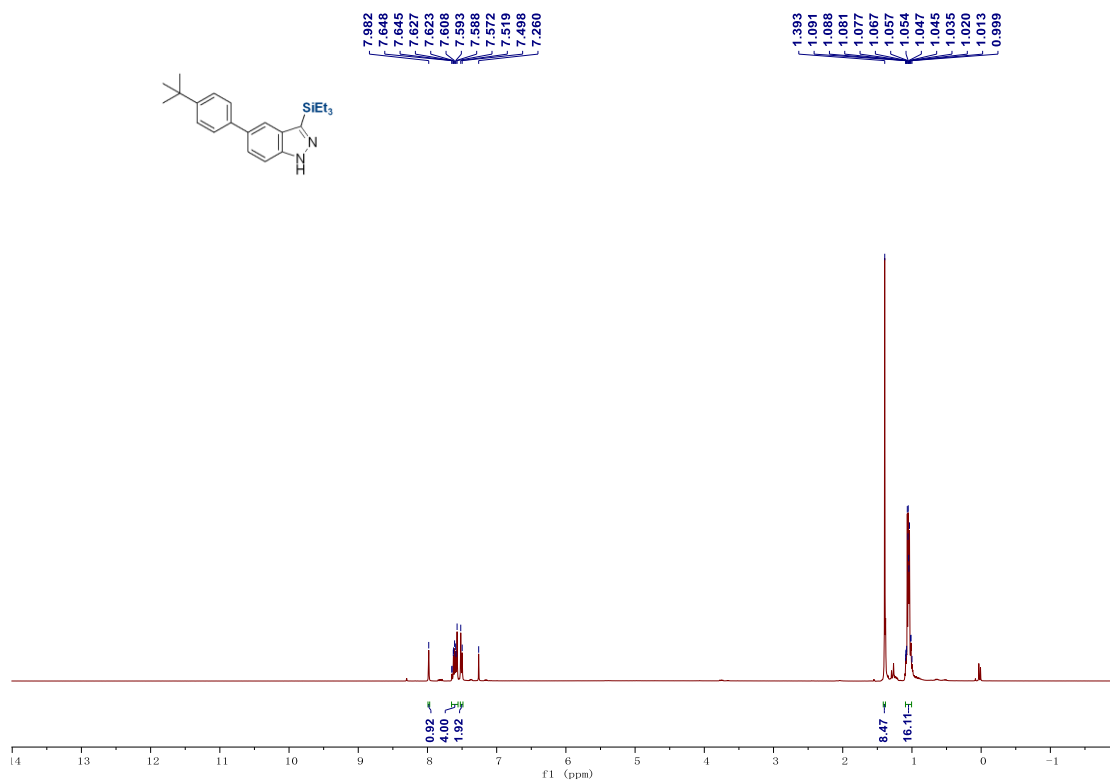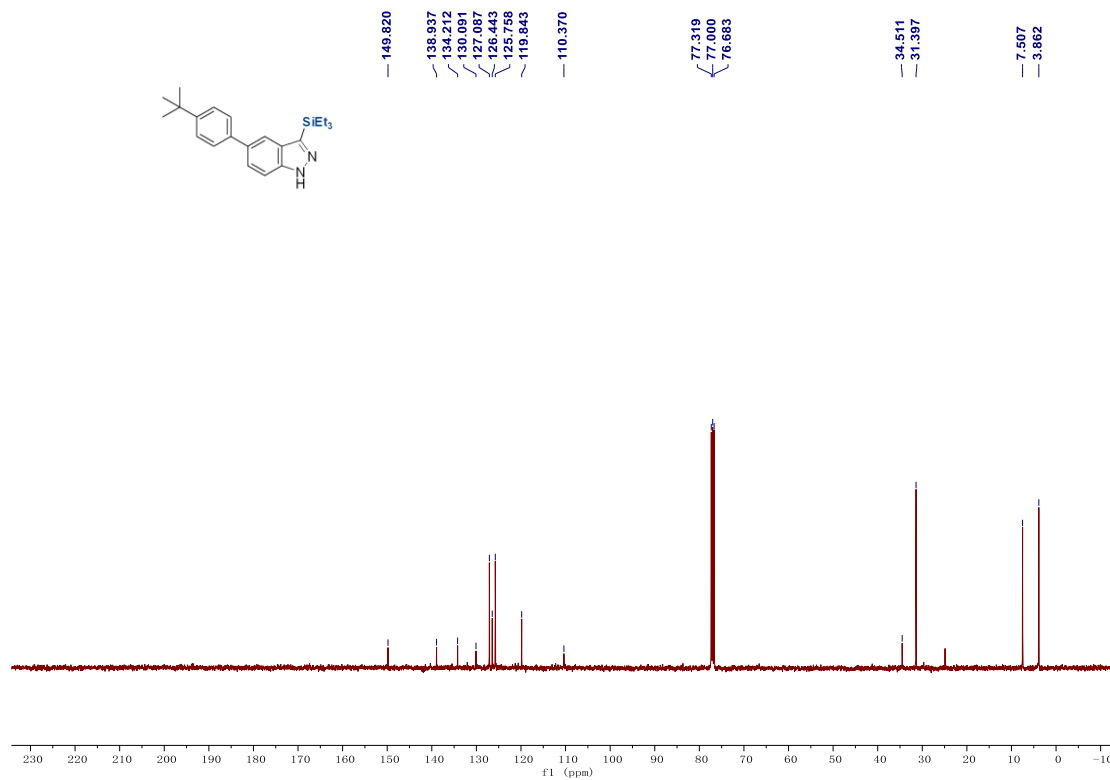

### 5-(4-*tert*-Butylphenyl)-1-phenyl-3-(triethylsilyl)-1*H*-indazole (38b)

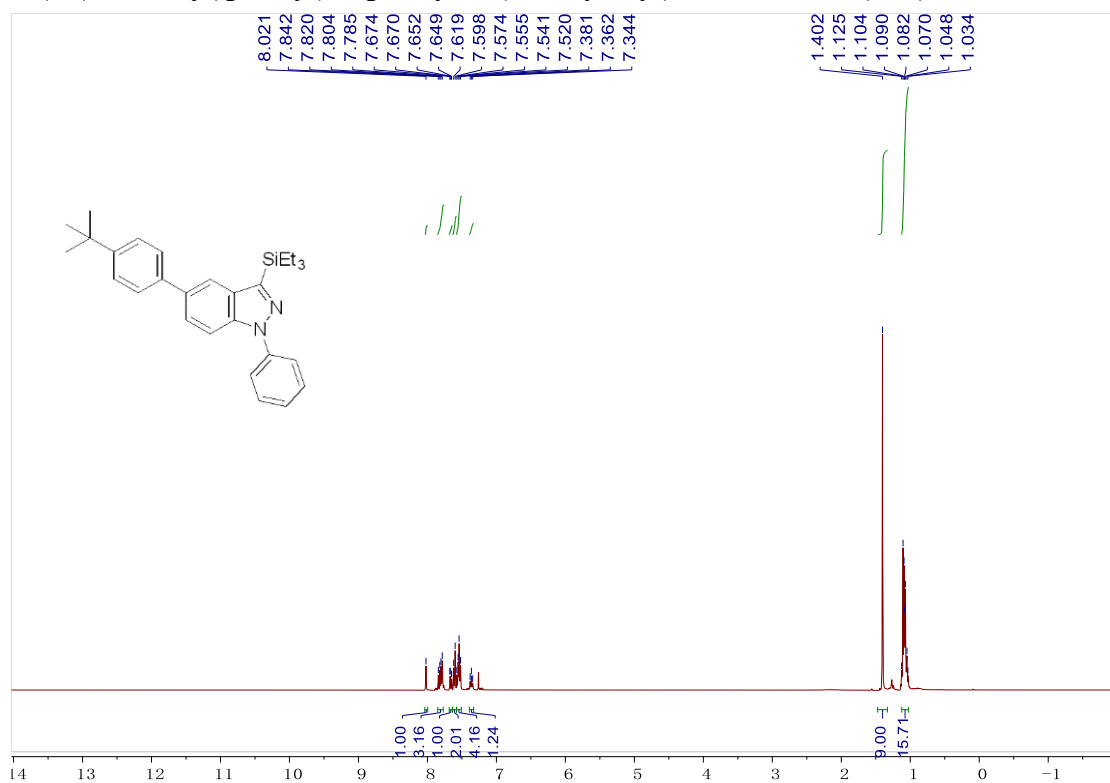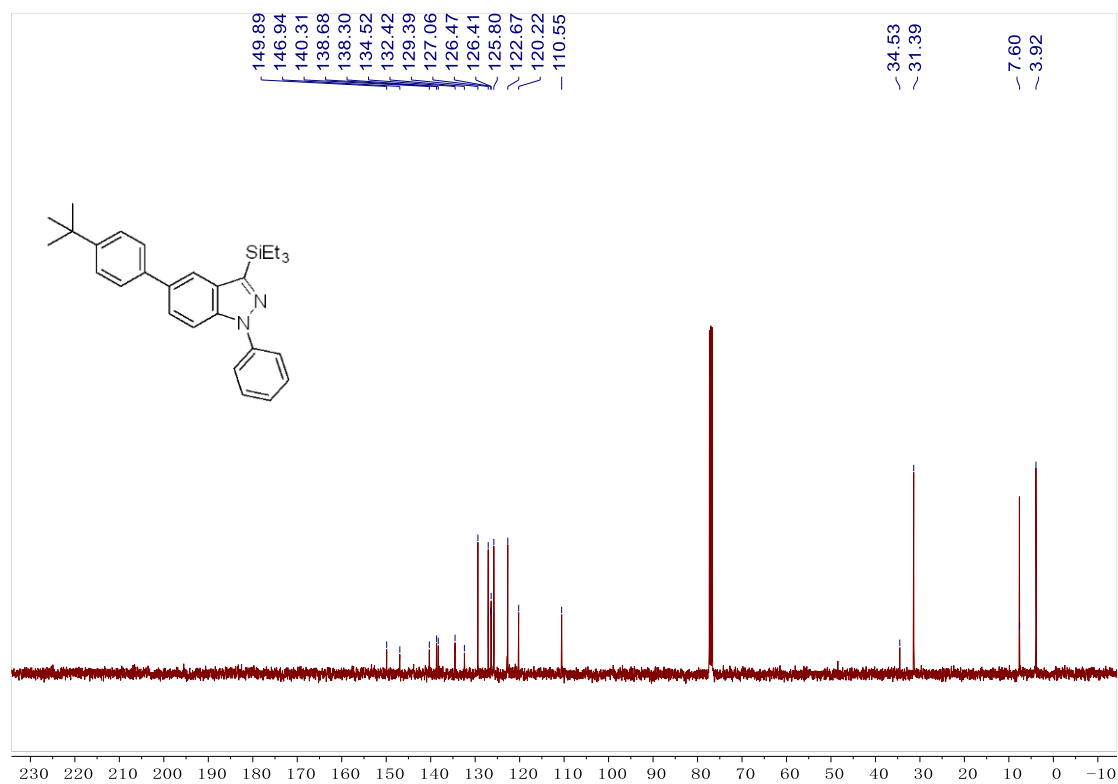

**6-(3,5-Dimethoxyphenyl)-3-(triethylsilyl)-1H-indazole (39)**

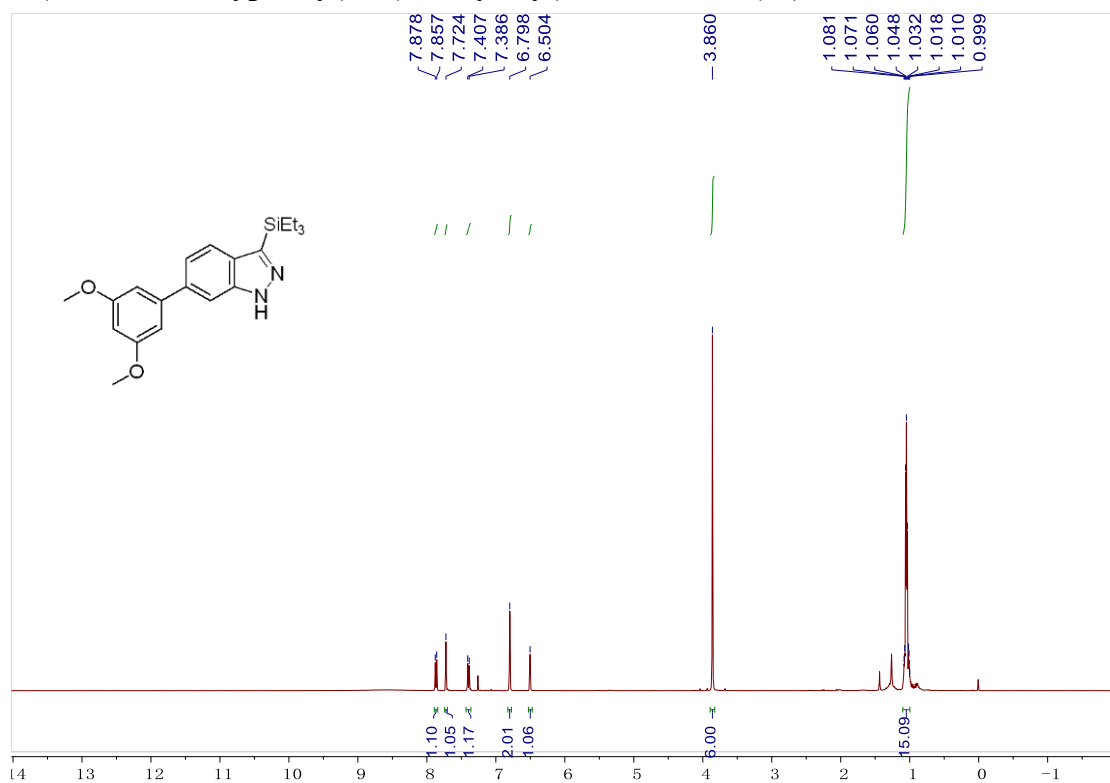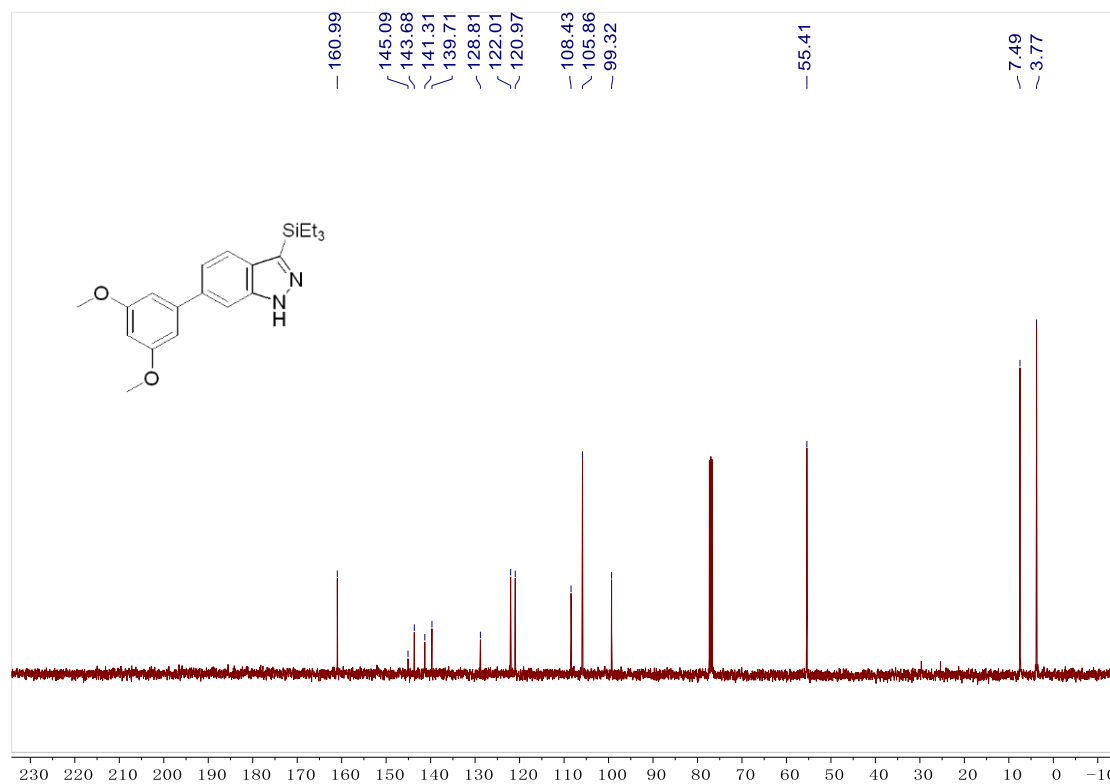

### 6-(3,5-Dimethoxyphenyl)-1-phenyl-3-(triethylsilyl)-1H-indazole (39b)

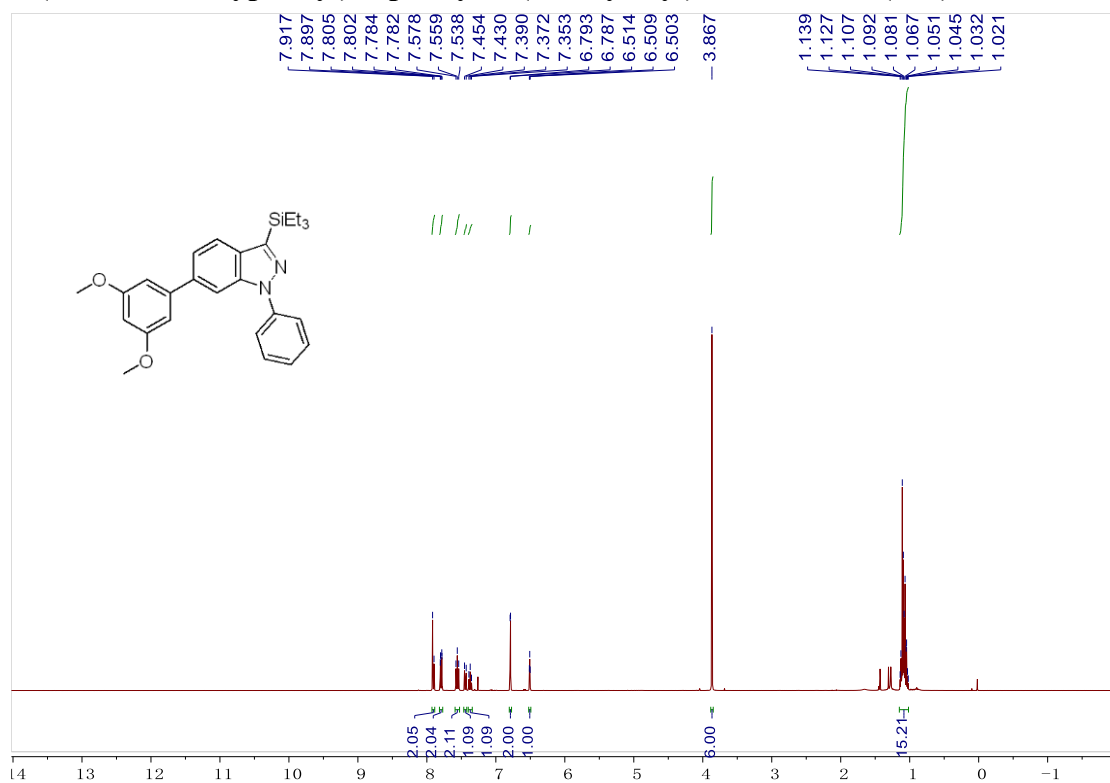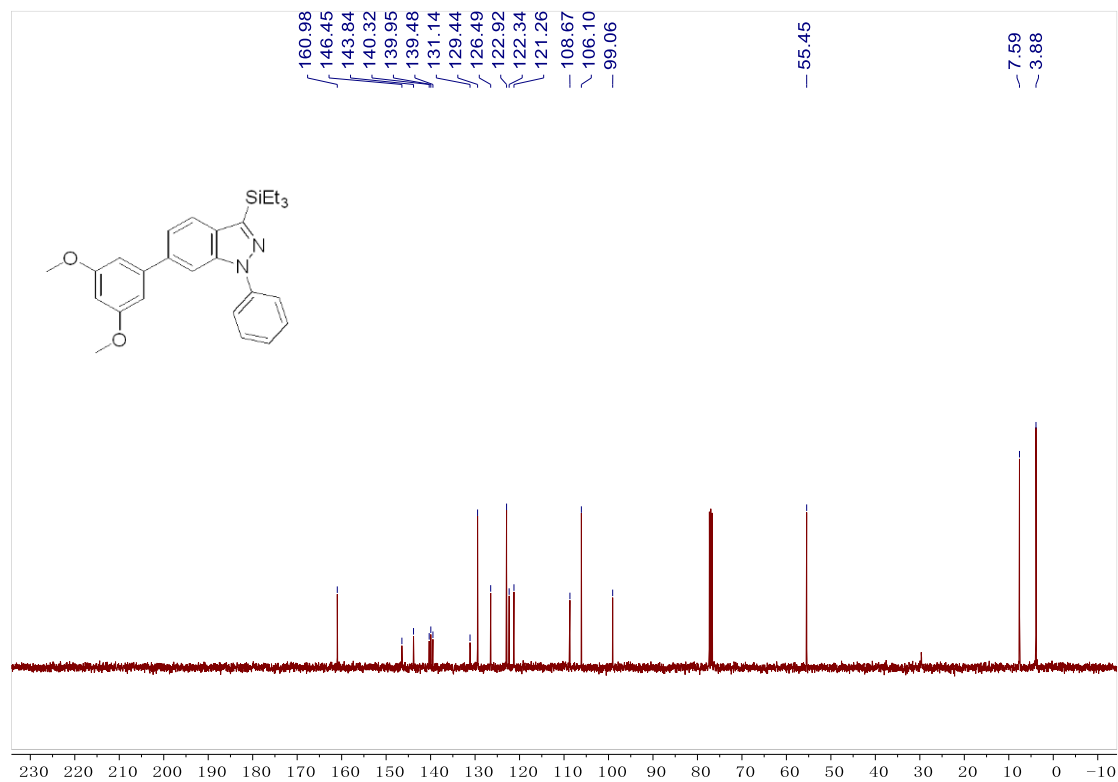

### 3-(Triethylsilyl)-7-(4-(trimethylsilyl)phenyl)-1H-indazole (40)

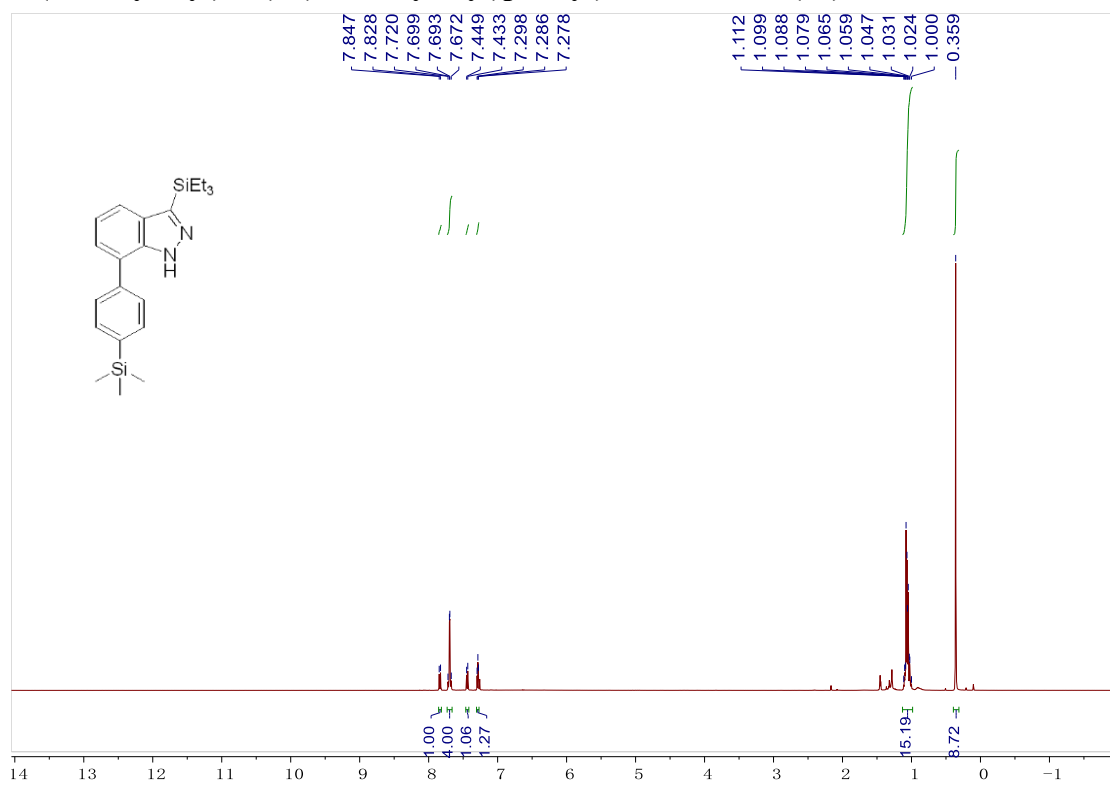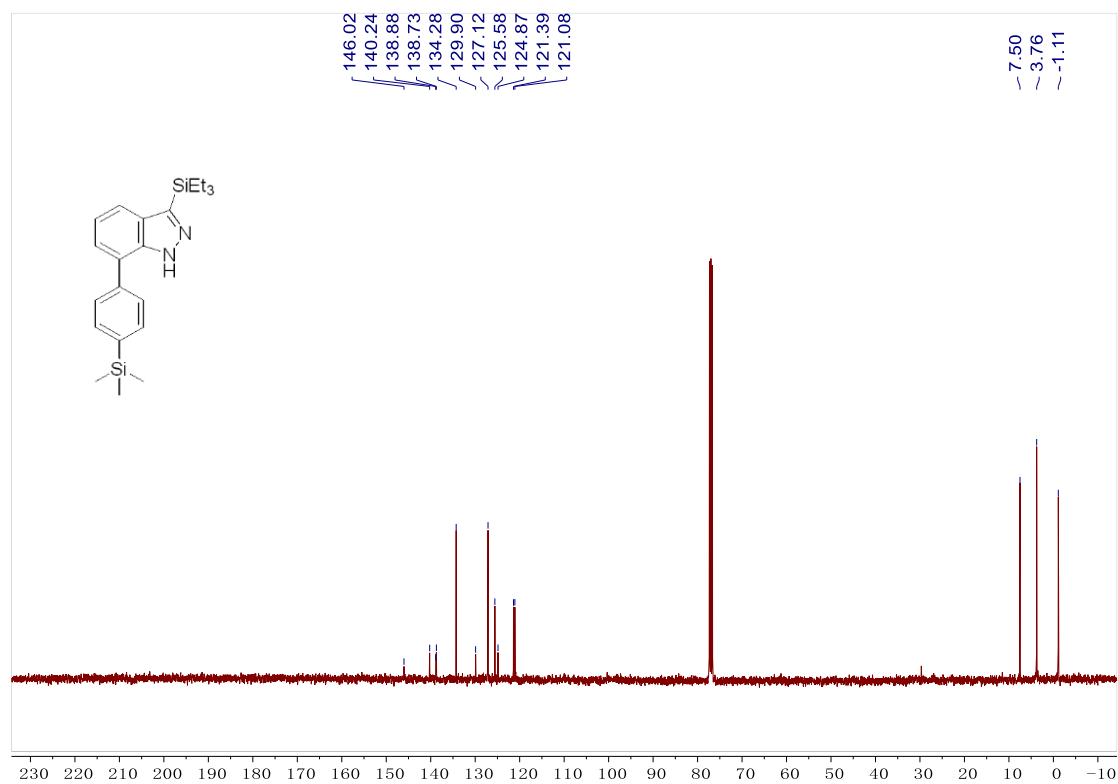

**1-phenyl-3-(triethylsilyl)-7-(4-(trimethylsilyl)phenyl)-1H-indazole (40b).**

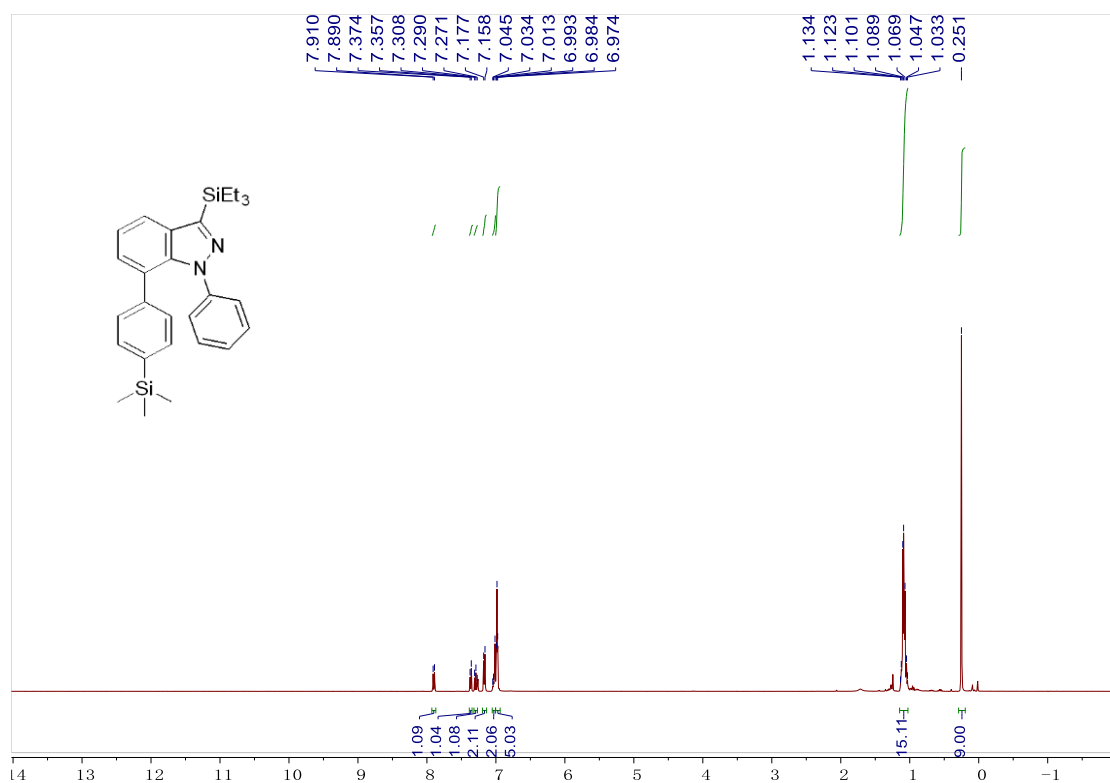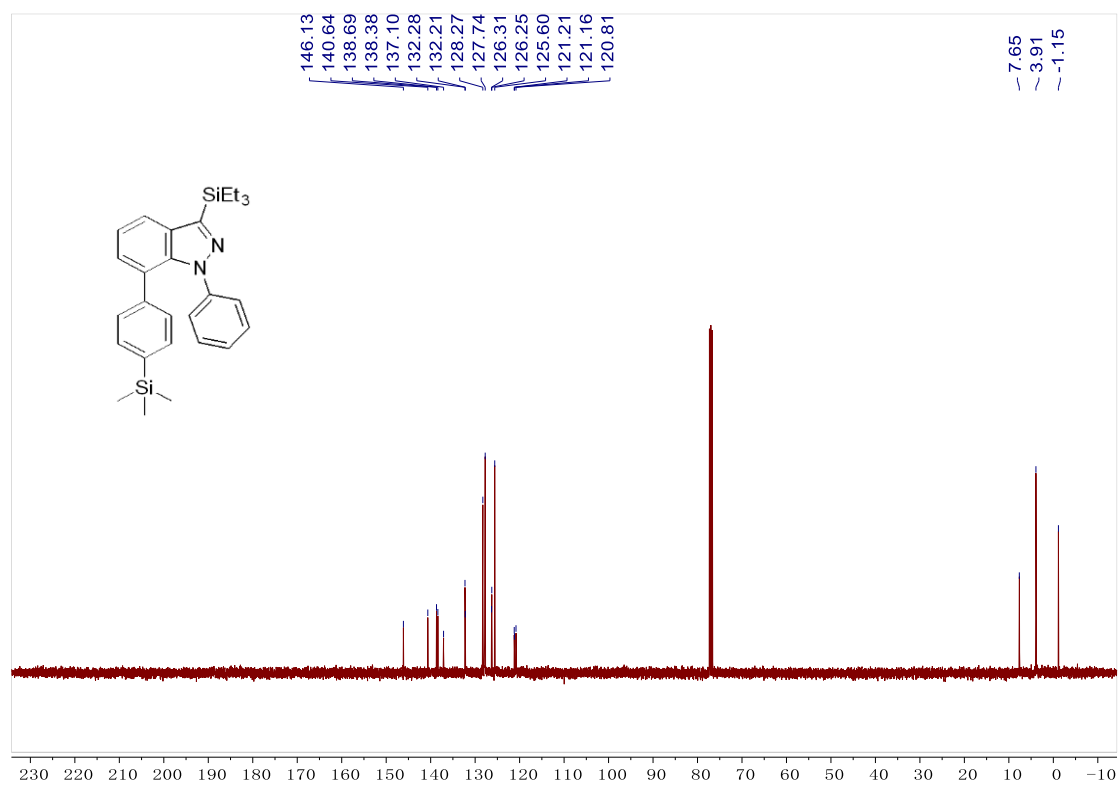



# 5-Methyl-3-(triethylsilyl)-3a,7a-dihydro-1H-indazole (41)

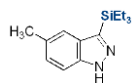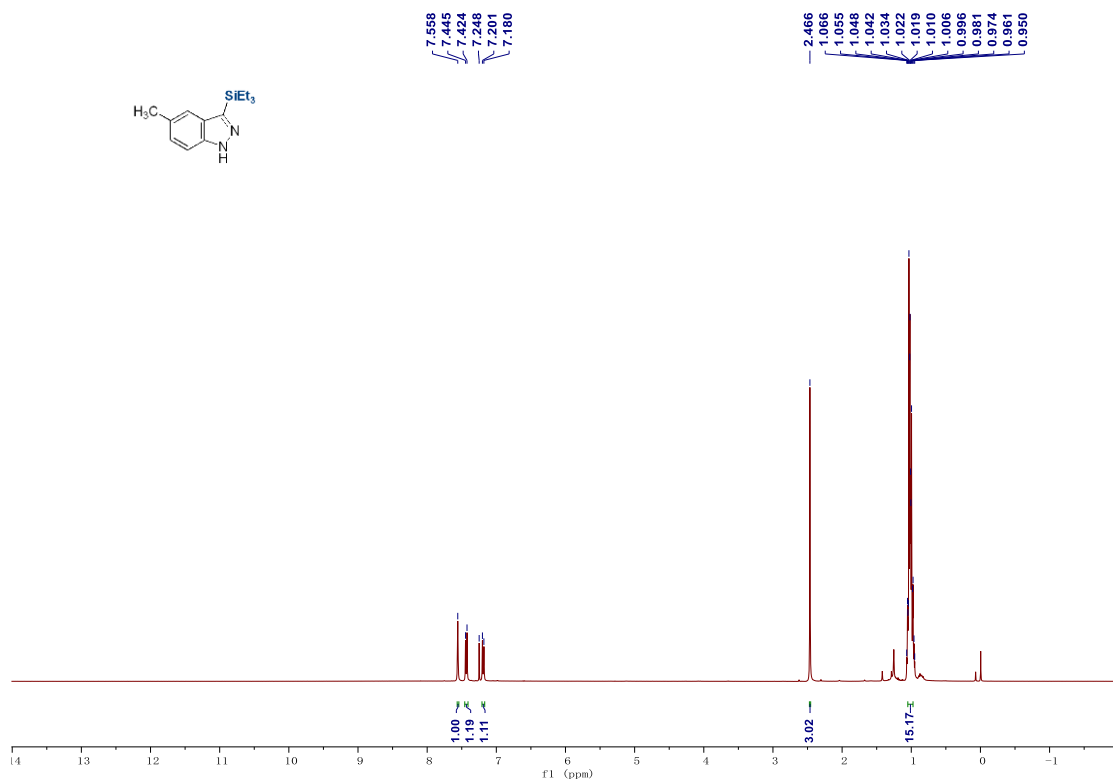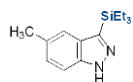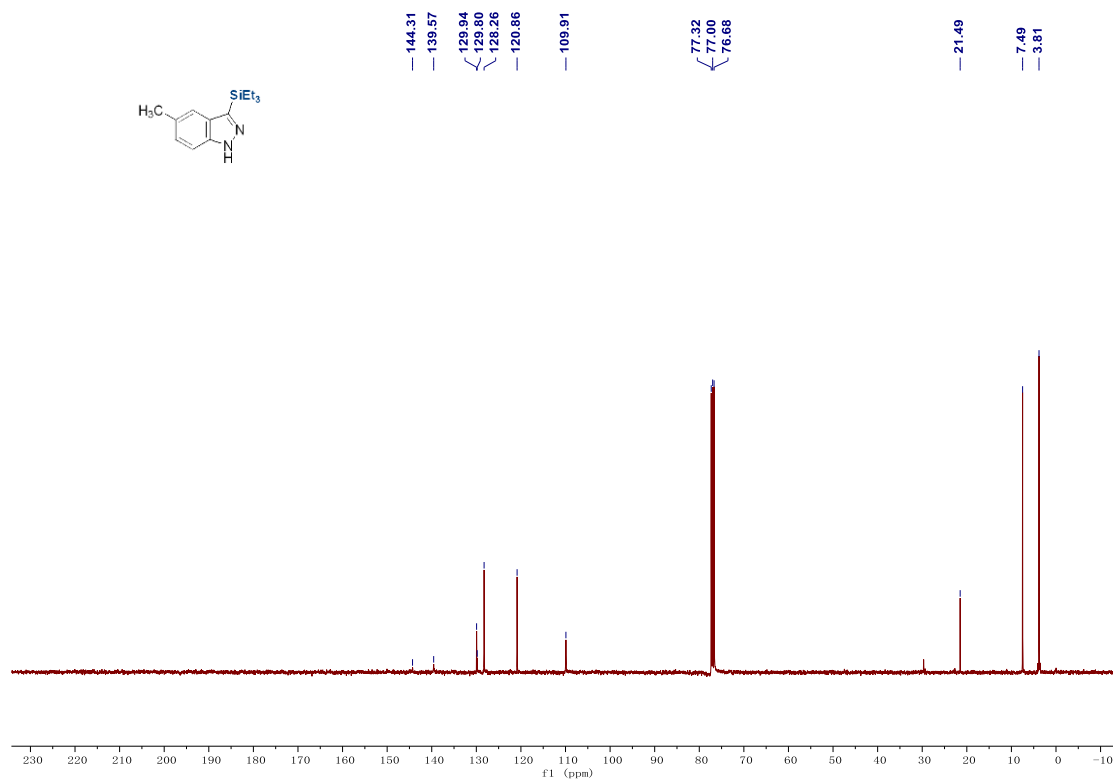

# 5-Methoxy-3-(triethylsilyl)-3a,7a-dihydro-1H-indazole (42)

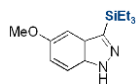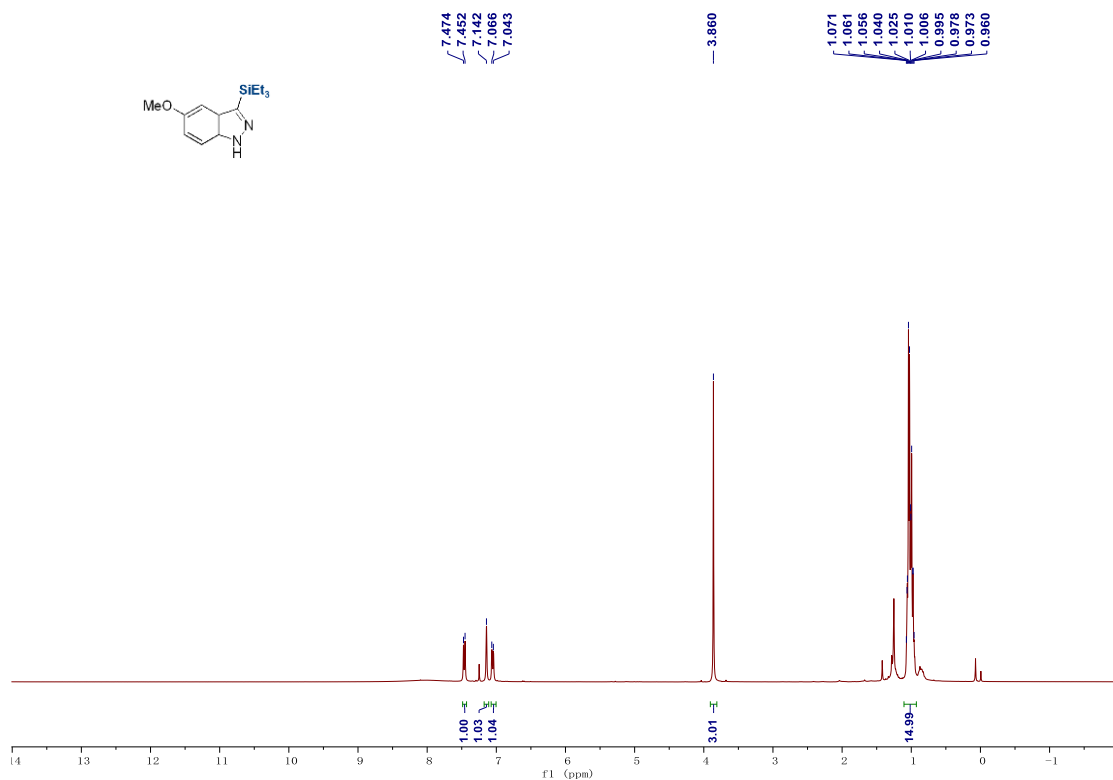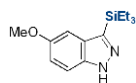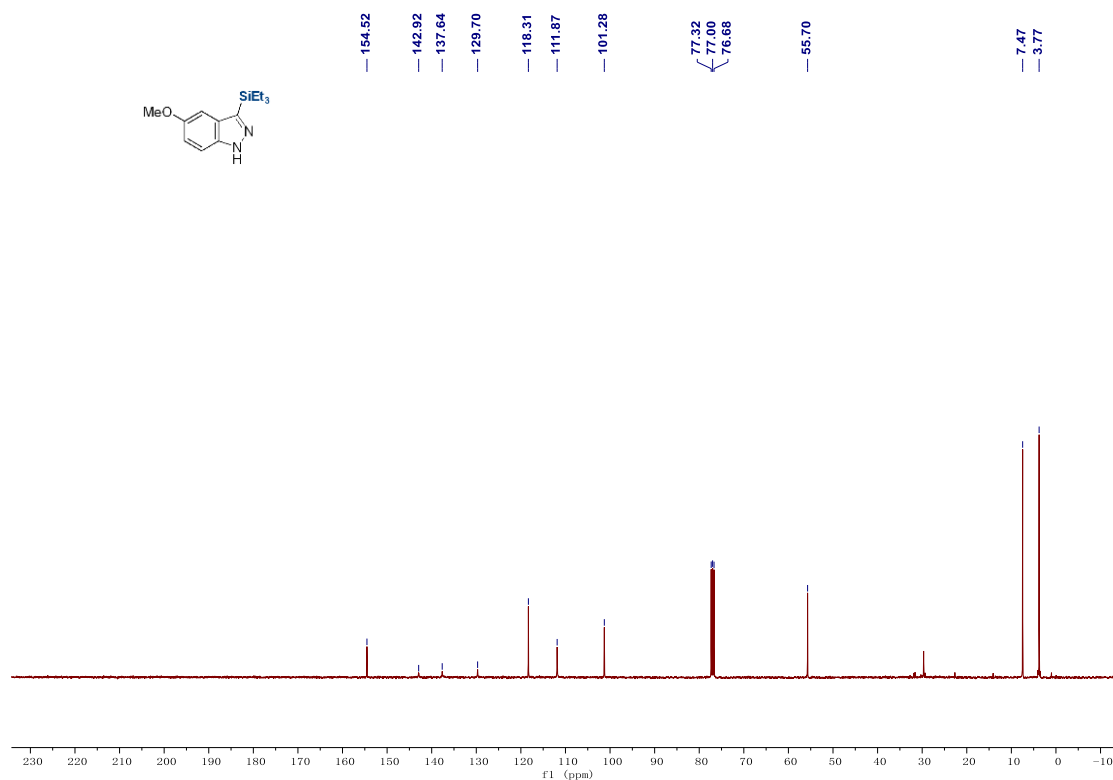

# 5-(4,4,5,5-tetramethyl-1,3,2-dioxaborolan-2-yl)-3-(triethylsilyl)-1H-indazole(43)

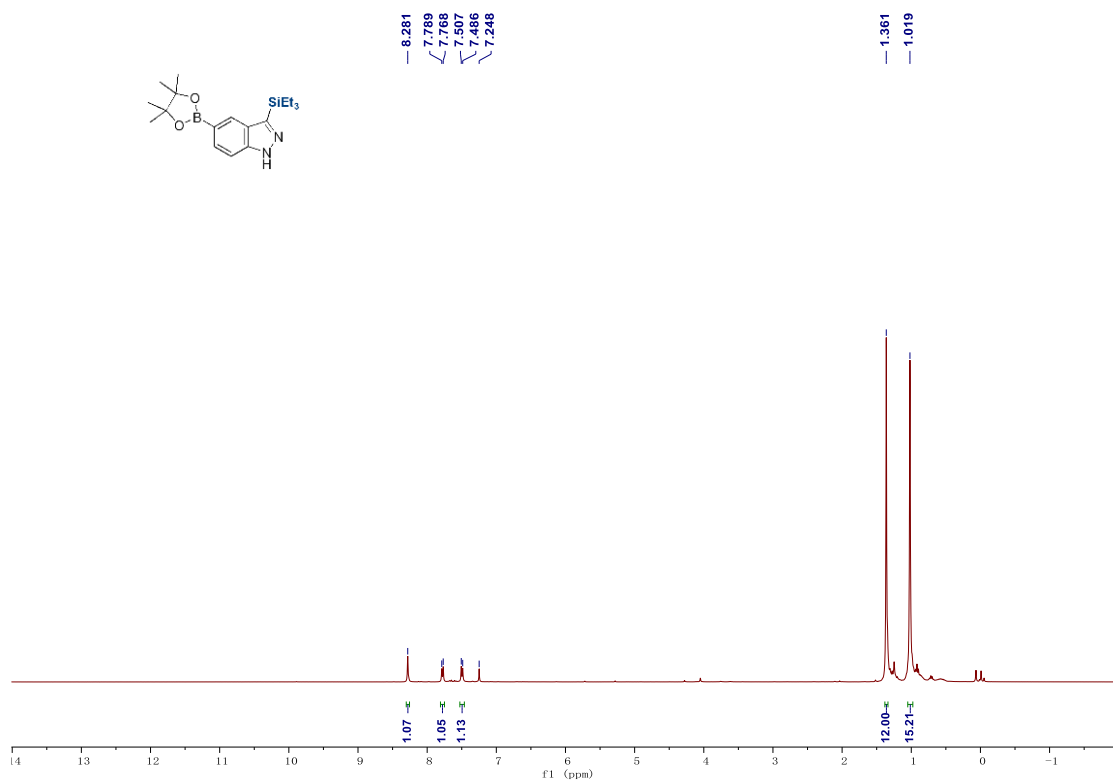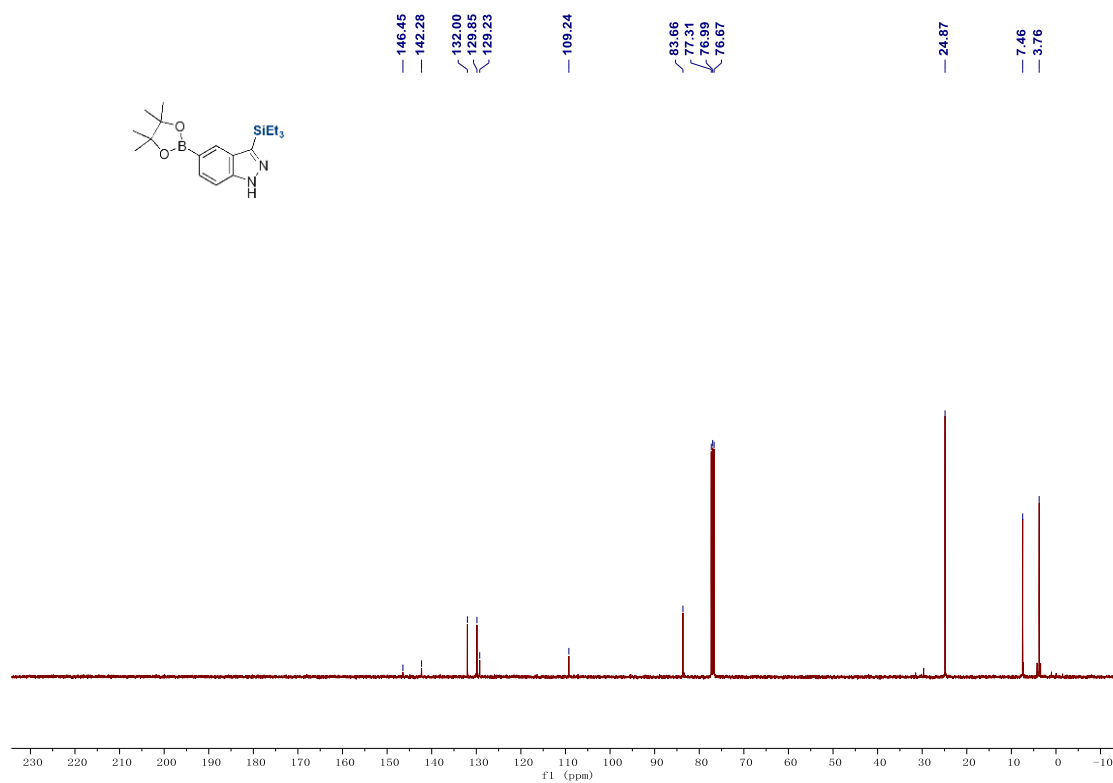

5-(4,4,5,5-tetramethyl-1,3,2-dioxaborolan-2-yl)-3-(triethylsilyl)-1H-indazole(44)

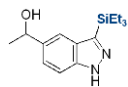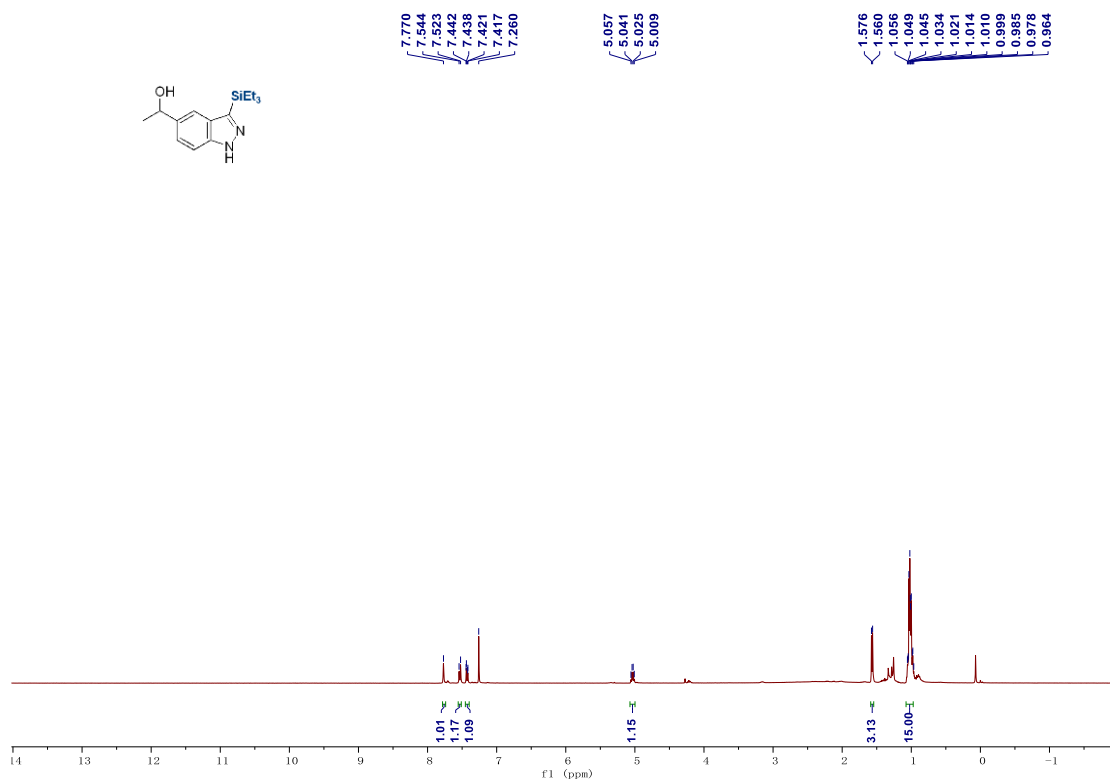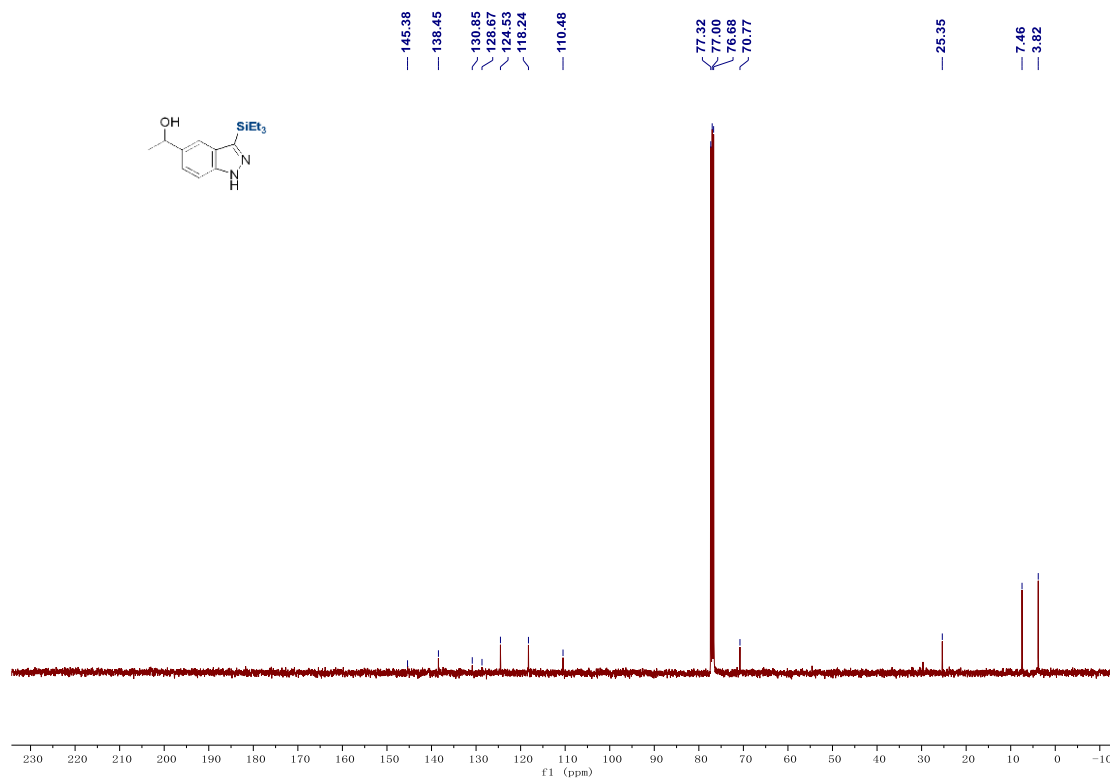

## 2-Phenyl-2H-indazol-3-yl acetate (45)

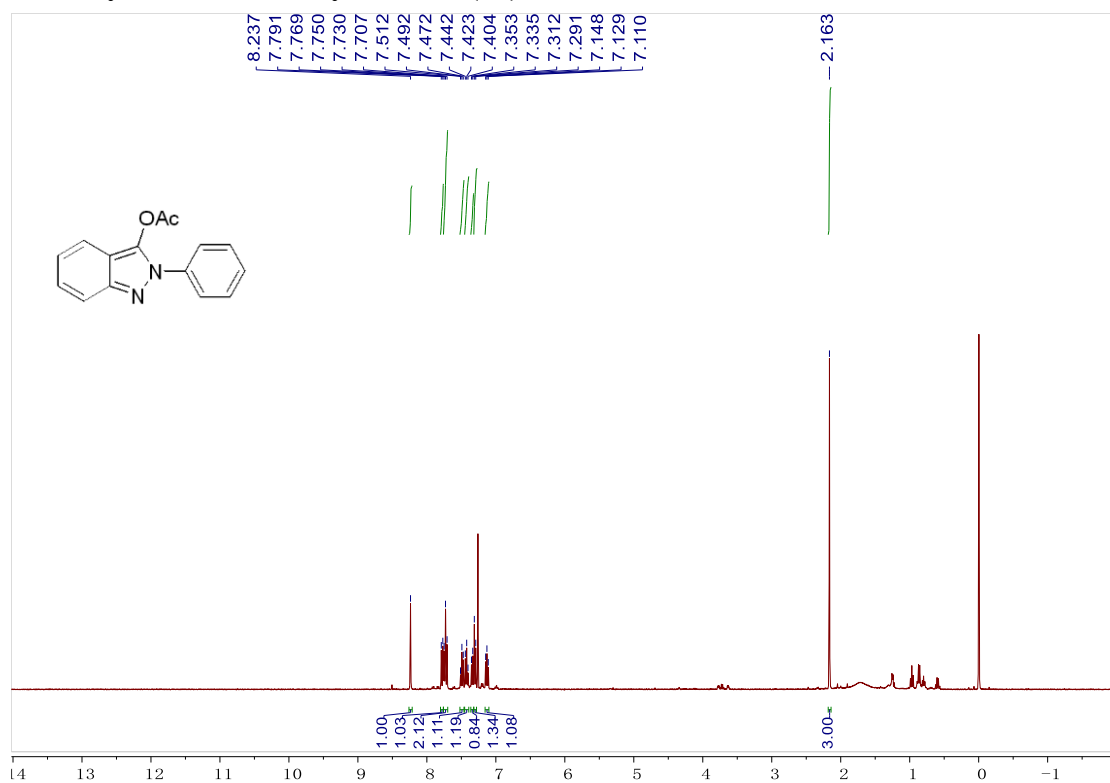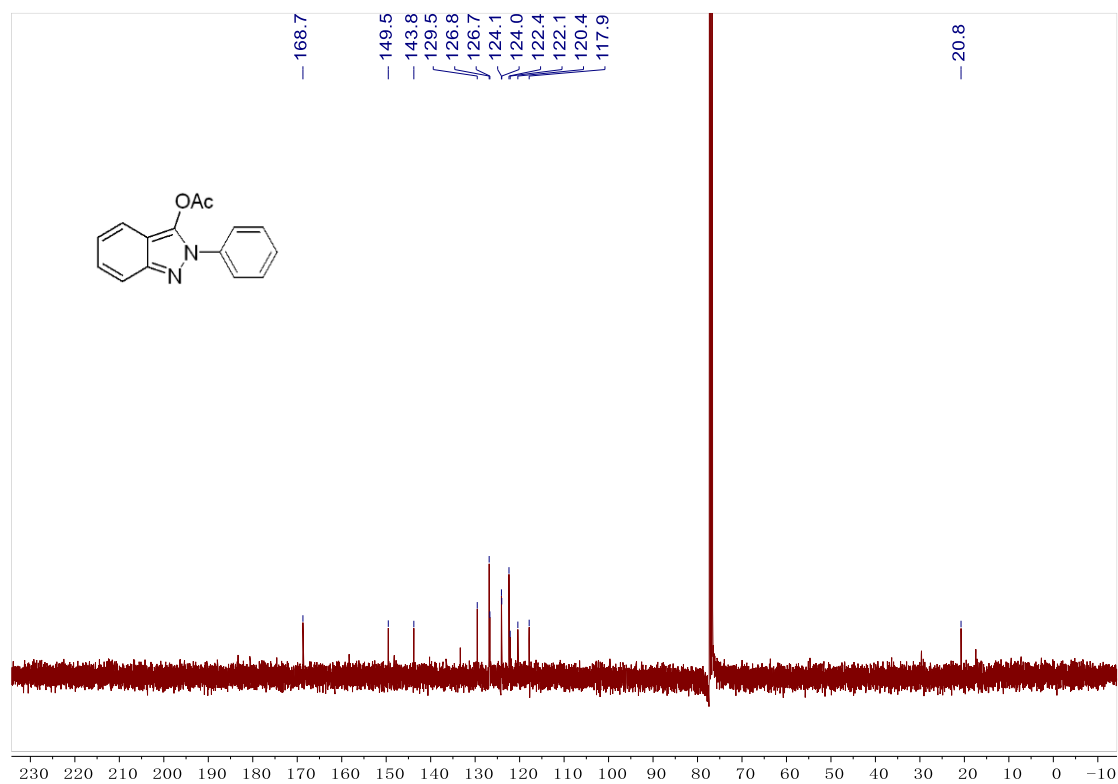

### 3-Chloro-2-phenyl-2H-indazole (46)

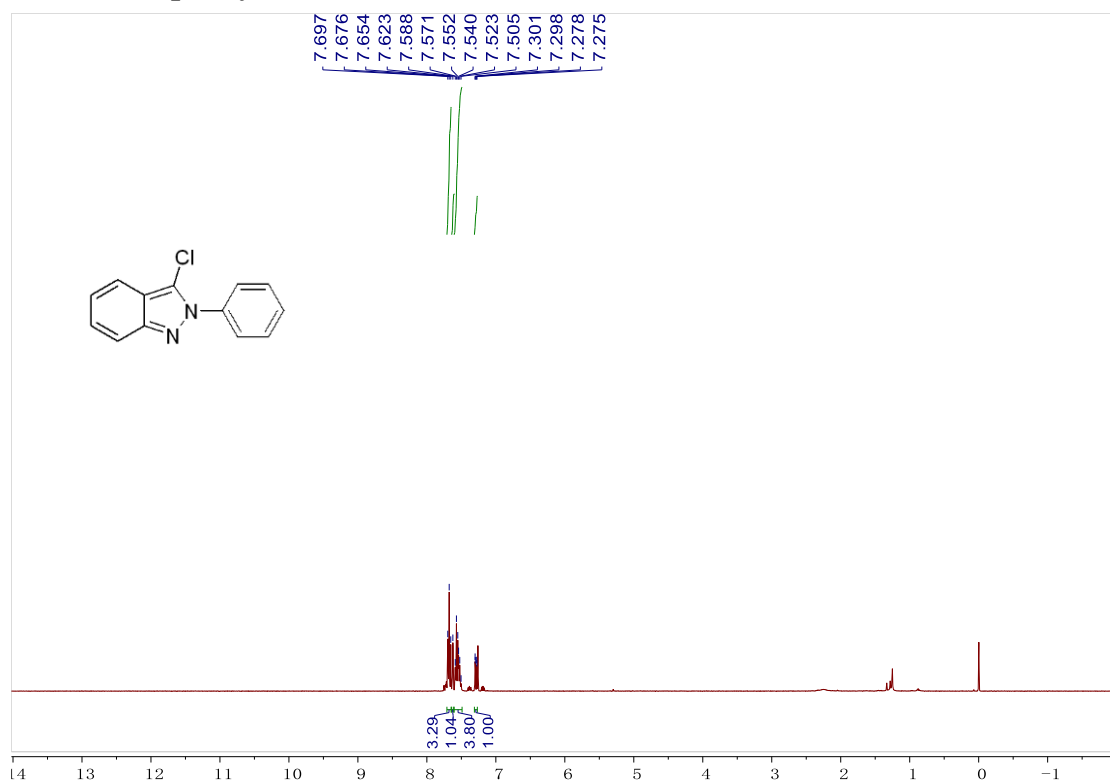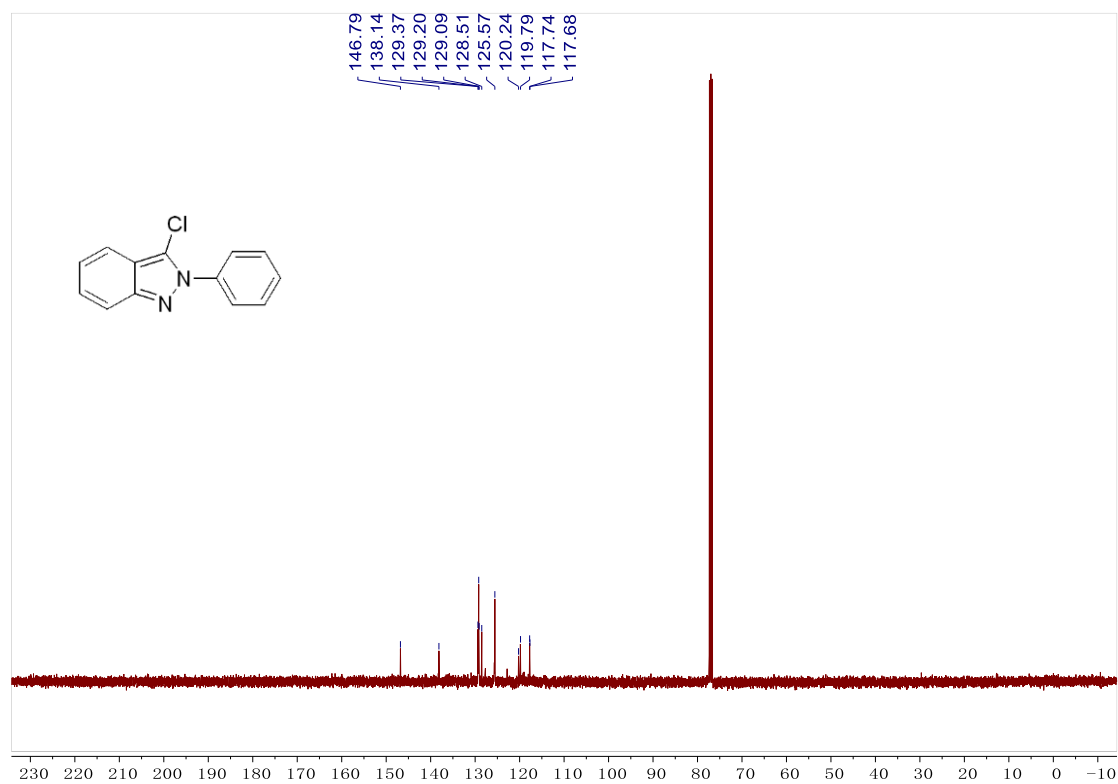

### 3-Bromo-2-phenyl-2H-indazole (47)

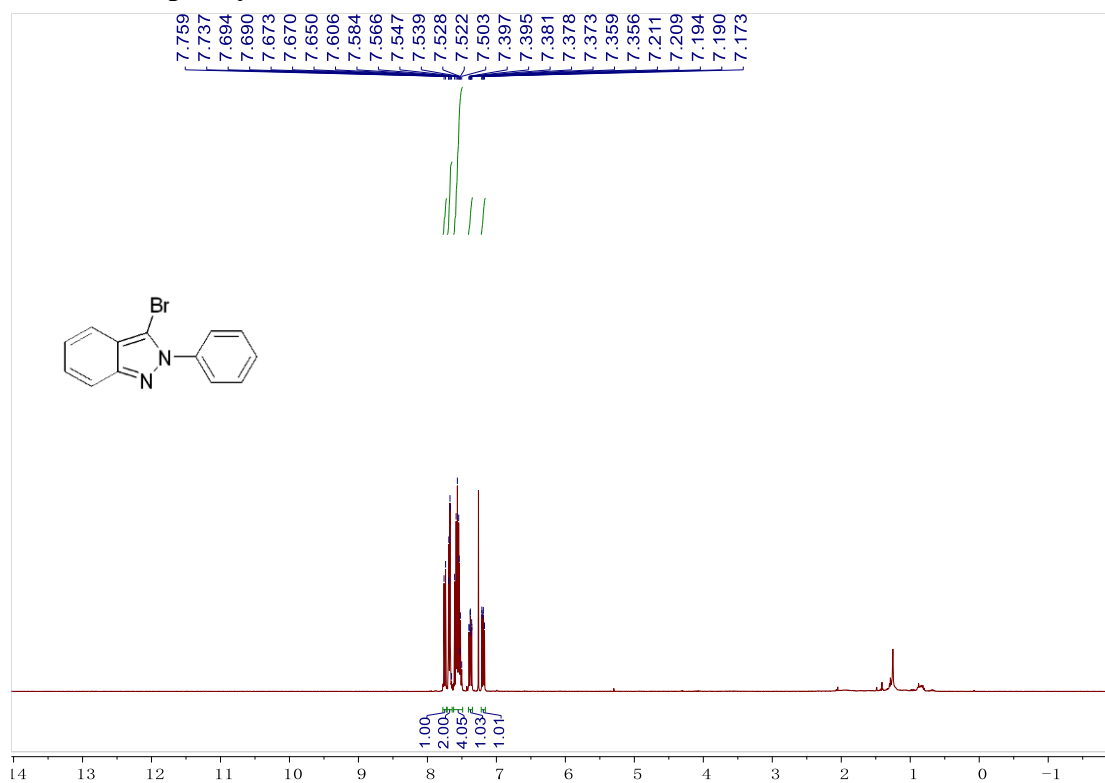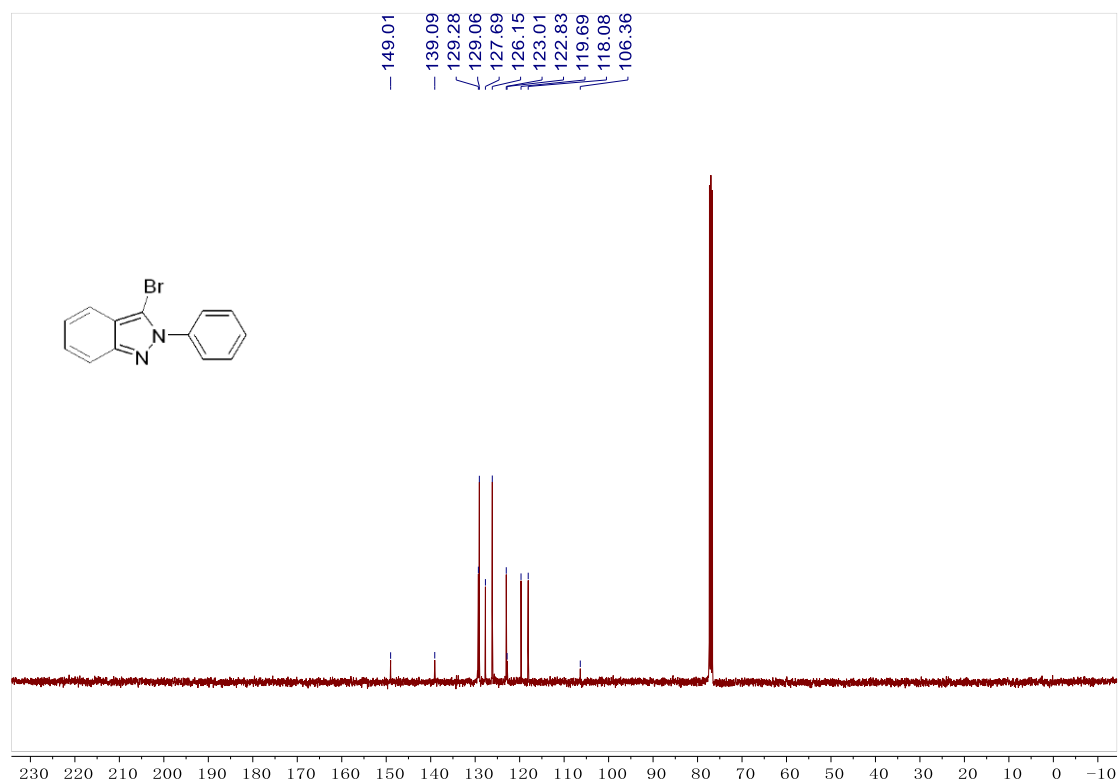

### 3-Iodo-2-phenyl-2H-indazole (48)

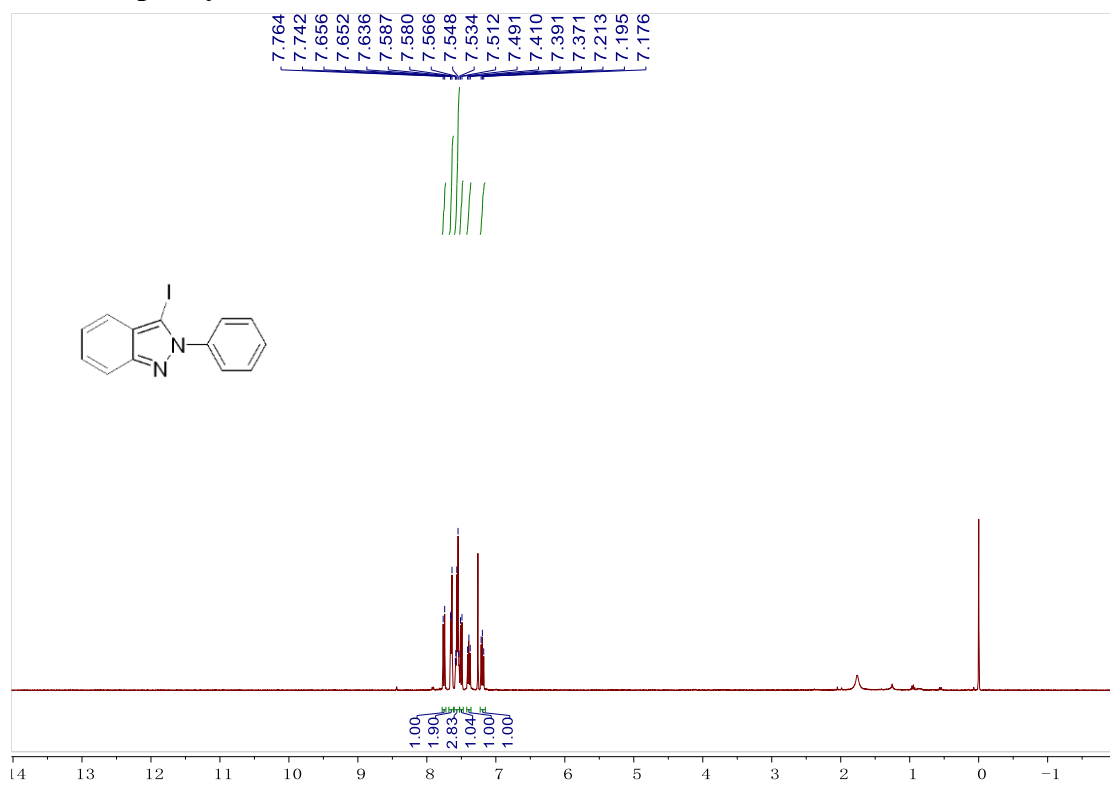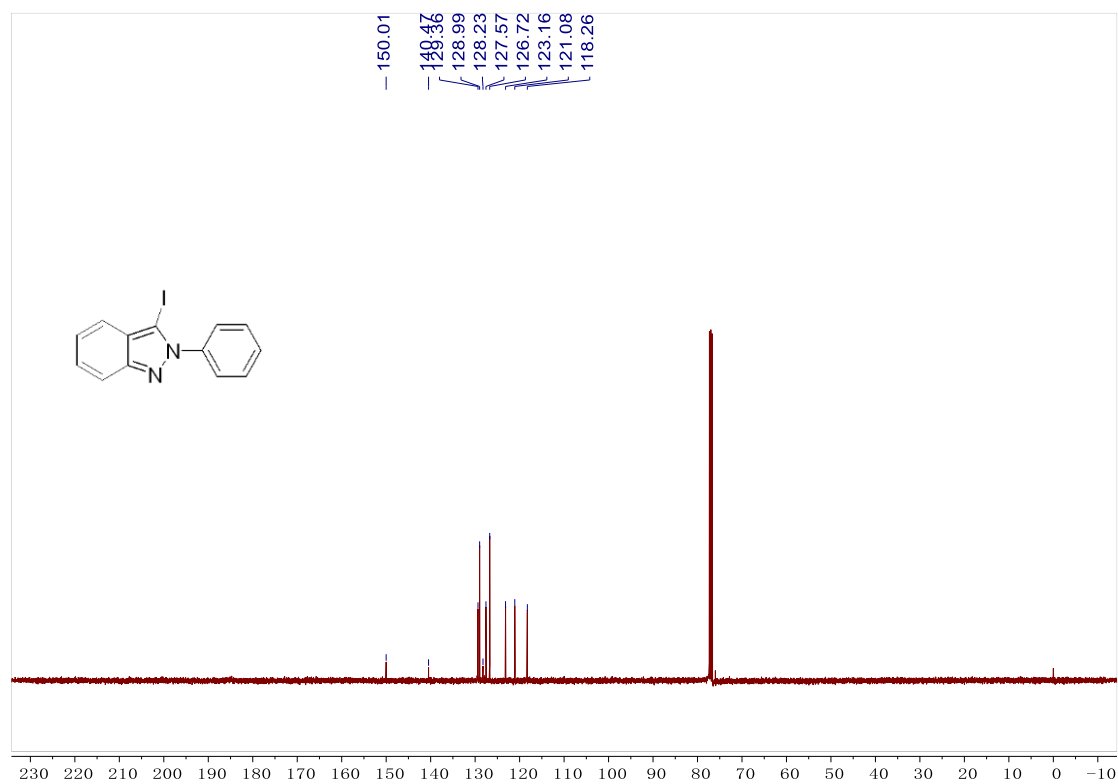

Supplement: d3qo01103h1.pdf [file d3qo01103h1.pdf]
